# Supplementary material for: An Alternative Strategy for Screening and Confirmation of 330 Pesticides in Ground- and Surface Water Using Liquid Chromatography Tandem Mass Spectrometry
Source: MDPI journal article supplement (doi:10.3390/molecules27061872), 2022-03-14
Supplement: s1 [file s1]

# An Alternative Strategy for Screening and Confirmation of 330 Pesticides in Ground- and Surface Water Using Liquid Chromatography Tandem Mass Spectrometry

Edgár Tóth <sup>1,†</sup>, Ádám Tölgyesi <sup>1,\*;†</sup>, Andrea Simon <sup>1</sup>, Mária Bálint <sup>1</sup>, Xingmao Ma <sup>2</sup>  
and Virender K. Sharma <sup>3,\*</sup>

<sup>1</sup> Bálint Analitika Ltd., Fehérvári út 144, 1116 Budapest, Hungary; ttedgar90@gmail.com (E.T.); schimocza@gmail.com (A.S.); hplc@balintanalitika.hu (M.B.)

<sup>2</sup> Department of Civil and Environmental Engineering, Texas A&M University, College Station, TX 77843, USA; samuelma@tamu.edu

<sup>3</sup> Program for the Environment and Sustainability, Department of Environmental and Occupational Health, School of Public Health, Texas A&M University, 212 Adriance Lab Road, 1266 TAMU, College Station, TX 77843, USA

\* Correspondence: tolgyesi83@gmail.com (Á.T.); vsharma@tamu.edu (V.K.S.)

† These authors contributed equally to this work.

**Citation:** Tóth, E.; Tölgyesi, Á.; Simon, A.; Bálint, M.; Ma, X.; Sharma, V.K. An Alternative Strategy for Screening and Confirmation of 330 Pesticides in Ground- and Surface Water Using Liquid Chromatography Tandem Mass Spectrometry. *Molecules* **2022**, *27*, 1872. <https://doi.org/10.3390/molecules27061872>

Academic Editors: Jean-Christophe Garrigues and Florence Benoit-Marquié

Received: 21 February 2022

Accepted: 11 March 2022

Published: 14 March 2022

**Publisher's Note:** MDPI stays neutral with regard to jurisdictional claims in published maps and institutional affiliations.

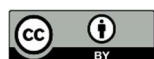

**Copyright:** © 2022 by the authors. Submitted for possible open access publication under the terms and conditions of the Creative Commons Attribution (CC BY) license (<https://creativecommons.org/licenses/by/4.0/>).

**Figure S1:** Extracted ion chromatogram of 480 pesticides in neat solvent at 100 ng/mL.

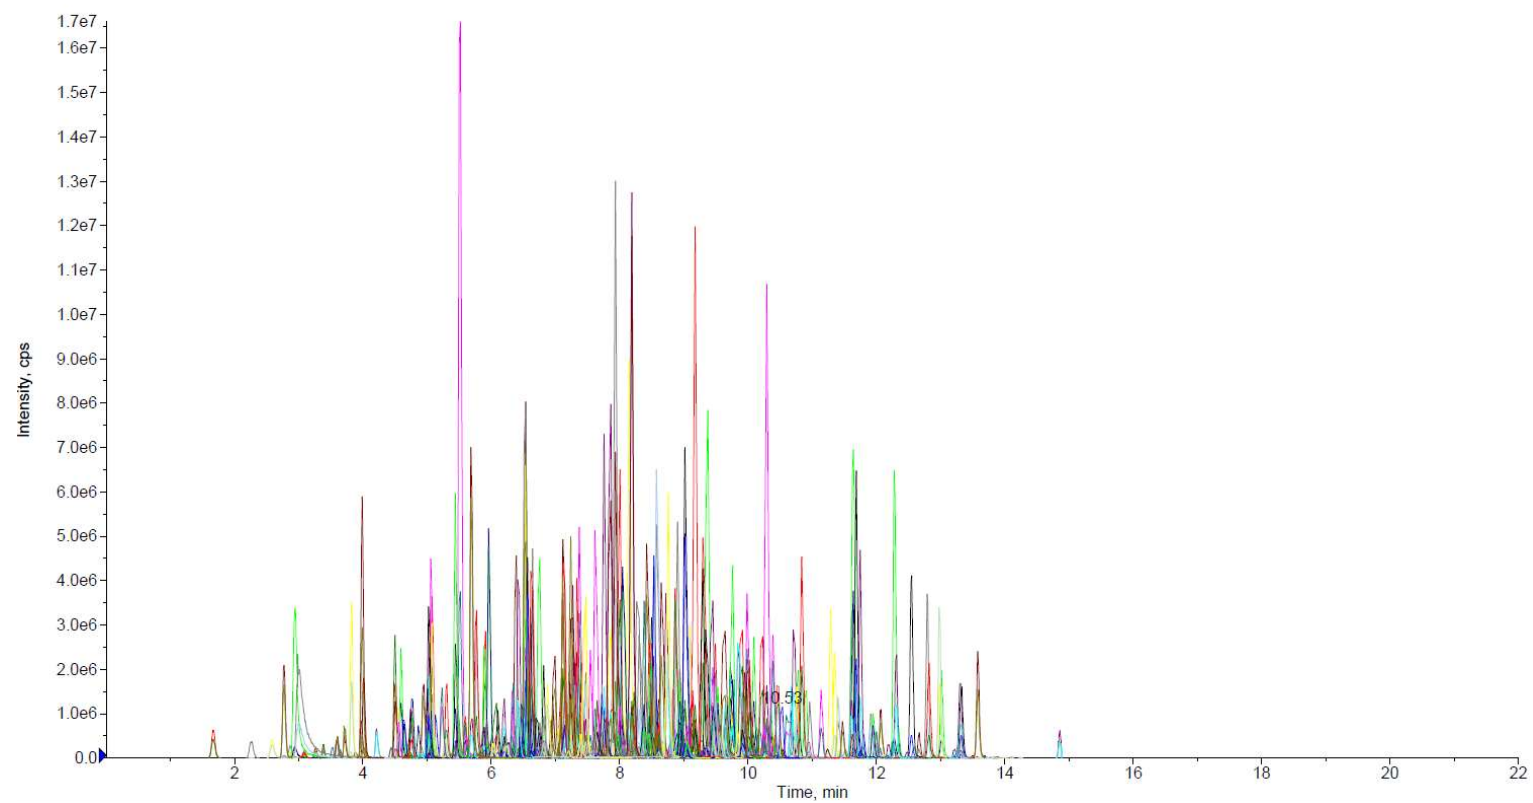

**Figure S2.** Recovery (%) *versus* retention time (min) at 100 ng/L in groundwater.

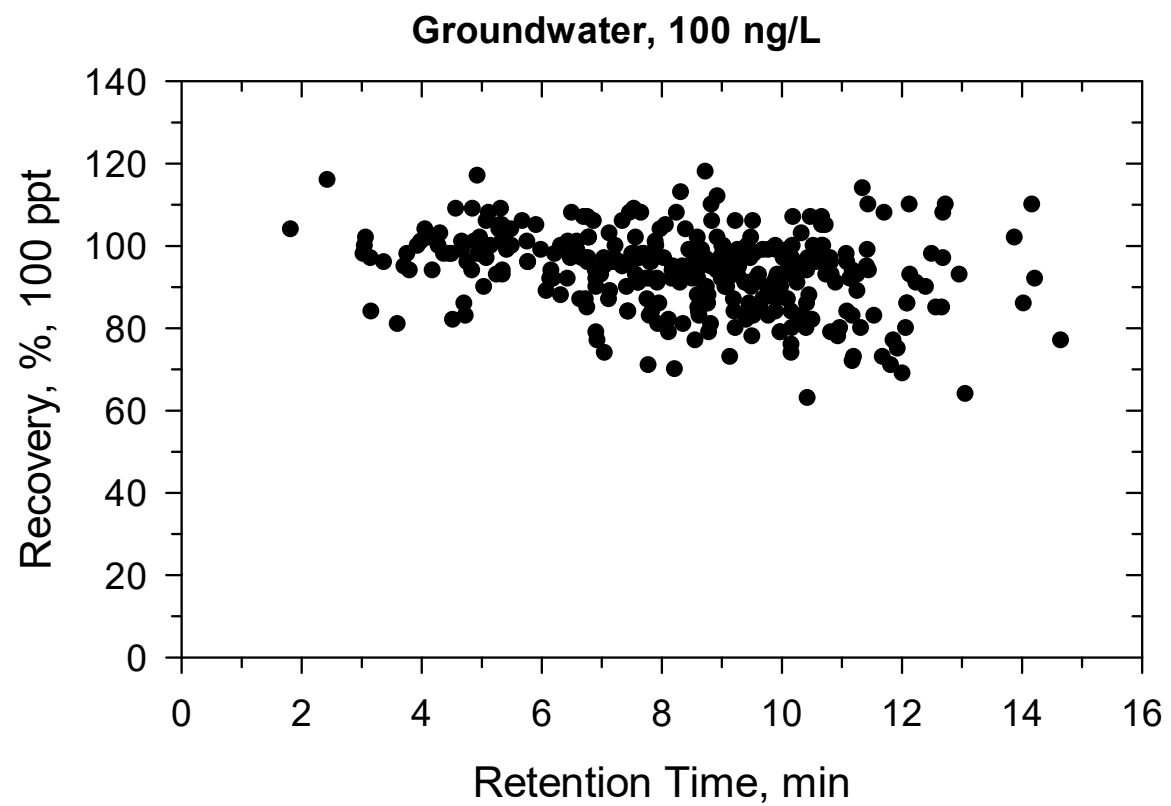

**Figure S3.** Precision (%) *versus* retention time (min) at 100 ng/L in groundwater.

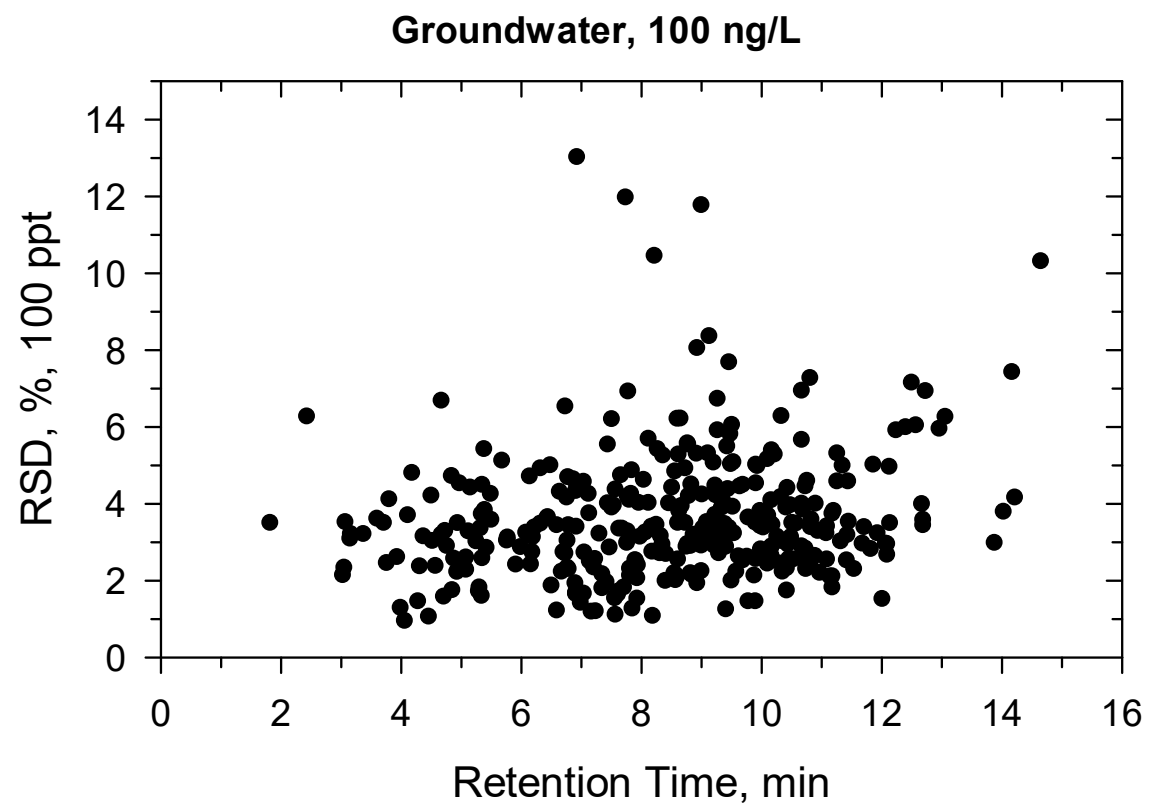

**Figure S4.** Recovery (%) *versus* retention time (min) at 100 ng/L in surface water.

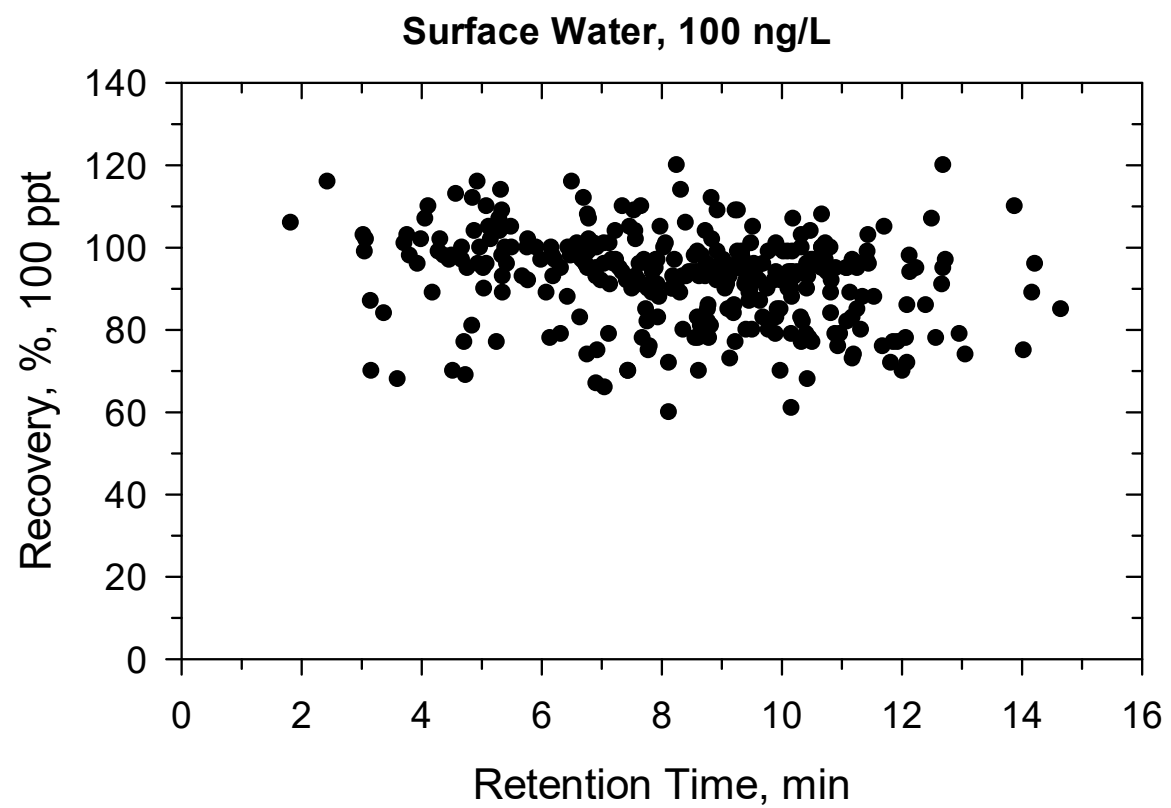

**Figure S5.** Precision (%) *versus* retention time (min) at 100 ng/L in surface water.

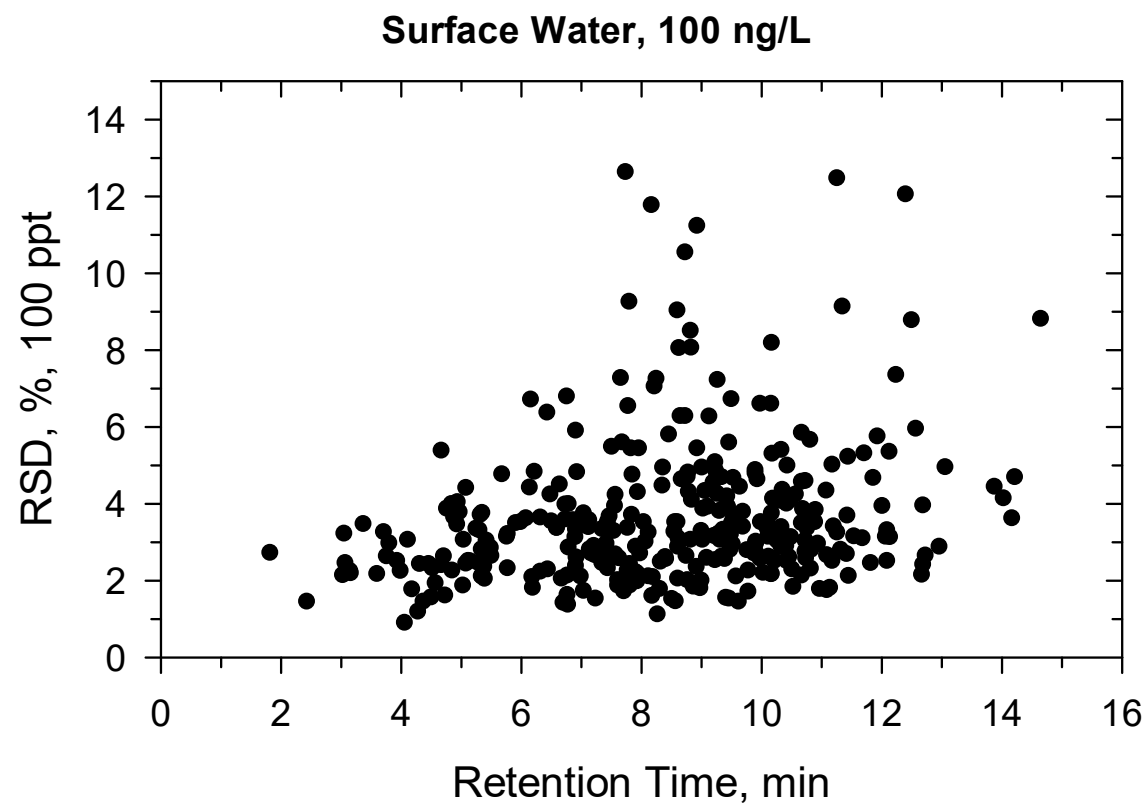

**Table S1:** The scheduled MRM ion transitions of the tested 480 pesticides, the MRM time window was 120 s, the cycle was 0.400 s. First ion transition was used for quantification and the second was used for confirmation. Those compounds are highlighted that did not fulfill the recovery criteria of 60-120%. CE: collision energy; CXP: collision cell exit potential; DP: declustering potential; EP: entrance potential; IS: internal standard; Rt: retention time.

| Compound               | Rt (min) | Precursor ion (m/z) | Product ion (m/z) | DP (V) | EP (V) | CE (V) | CXP (V) | IS               |
|------------------------|----------|---------------------|-------------------|--------|--------|--------|---------|------------------|
| 3-Hydroxycarbofuran.1  | 5.3      | 238.1               | 181.0             | 66     | 10     | 15     | 12      |                  |
| 3-Hydroxycarbofuran.2  | 5.3      | 238.1               | 163.0             | 66     | 10     | 19     | 10      |                  |
| Acephate.1             | 2.4      | 184.1               | 143.0             | 46     | 10     | 11     | 28      |                  |
| Acephate.2             | 2.4      | 184.1               | 49.0              | 46     | 10     | 35     | 0       |                  |
| Acetamiprid.1          | 5.3      | 223.0               | 126.0             | 68     | 10     | 29     | 8       | Acetamiprid-d3.1 |
| Acetamiprid.2          | 5.3      | 223.0               | 99.0              | 68     | 10     | 53     | 6       | Acetamiprid-d3.1 |
| Acetochlor.1           | 9.5      | 270.3               | 224.1             | 111    | 10     | 15     | 12      |                  |
| Acetochlor.2           | 9.5      | 270.3               | 148.0             | 111    | 10     | 25     | 16      |                  |
| Acibenzolar-S-methyl.1 | 8.5      | 211.0               | 136.2             | 70     | 10     | 41     | 8       |                  |
| Acibenzolar-S-methyl.2 | 8.5      | 211.0               | 91.2              | 70     | 10     | 29     | 4       |                  |
| Aclonifen.1            | 9.9      | 265.0               | 248.2             | 76     | 10     | 27     | 12      |                  |
| Aclonifen.2            | 9.9      | 265.0               | 182.2             | 76     | 10     | 39     | 12      |                  |
| Acrinathrin.1          | 12.9     | 559.1               | 208.1             | 36     | 10     | 19     | 12      |                  |
| Acrinathrin.2          | 12.9     | 559.1               | 181.0             | 36     | 10     | 33     | 10      |                  |
| Alachlor.1             | 9.5      | 270.0               | 162.0             | 91     | 10     | 27     | 16      |                  |
| Alachlor.2             | 9.5      | 270.0               | 147.0             | 91     | 10     | 47     | 18      |                  |
| Aldicarb.1             | 6.0      | 208.1               | 116.0             | 26     | 10     | 11     | 6       |                  |
| Aldicarb.2             | 6.0      | 208.1               | 89.0              | 26     | 10     | 23     | 4       |                  |
| Aldicarb-sulfone.1     | 3.6      | 240.1               | 148.2             | 36     | 10     | 25     | 6       |                  |
| Aldicarb-sulfone.2     | 3.6      | 240.1               | 86.2              | 36     | 10     | 29     | 12      |                  |
| Aldicarb-sulfoxide.1   | 3.3      | 207.1               | 132.1             | 56     | 10     | 9      | 8       |                  |
| Aldicarb-sulfoxide.2   | 3.3      | 207.1               | 89.1              | 56     | 10     | 19     | 6       |                  |

|                         |      |       |       |     |    |    |    |                            |
|-------------------------|------|-------|-------|-----|----|----|----|----------------------------|
| Ametoctradin.1          | 10.9 | 276.0 | 177.0 | 186 | 10 | 45 | 18 |                            |
| Ametoctradin.2          | 10.9 | 276.0 | 149.0 | 181 | 10 | 47 | 16 |                            |
| Ametryn.1               | 8.4  | 228.1 | 186.1 | 65  | 10 | 25 | 12 |                            |
| Ametryn.2               | 8.4  | 228.1 | 96.0  | 65  | 10 | 35 | 6  |                            |
| Amidosulfuron.1         | 4.5  | 370.0 | 261.1 | 65  | 10 | 20 | 12 |                            |
| Amidosulfuron.2         | 4.5  | 370.0 | 218.1 | 65  | 10 | 35 | 12 |                            |
| Aminocarb.1             | 6.8  | 209.1 | 137.1 | 56  | 10 | 33 | 8  |                            |
| Aminocarb.2             | 6.8  | 209.1 | 152.0 | 56  | 10 | 19 | 10 |                            |
| Amitraz.1               | 10.2 | 294.2 | 148.3 | 98  | 10 | 22 | 9  |                            |
| Amitraz.2               | 10.2 | 294.2 | 91.2  | 98  | 10 | 57 | 5  |                            |
| Anilofos.1              | 10.1 | 368.0 | 199.0 | 65  | 10 | 20 | 12 |                            |
| Anilofos.2              | 10.1 | 368.0 | 125.0 | 65  | 10 | 50 | 12 |                            |
| Atrazine.1              | 7.5  | 215.9 | 174.0 | 56  | 10 | 25 | 15 | Atrazine-d5.1              |
| Atrazine.2              | 7.5  | 215.9 | 104.1 | 56  | 10 | 39 | 15 | Atrazine-d5.1              |
| Atrazine-desethyl.1     | 5.7  | 188.1 | 145.9 | 1   | 10 | 23 | 16 |                            |
| Atrazine-desethyl.2     | 5.7  | 188.1 | 43.0  | 1   | 10 | 59 | 20 |                            |
| Atrazine-desisopropyl.1 | 4.7  | 174.0 | 104.0 | 51  | 10 | 31 | 14 | Atrazine-desisopropyl-d5.1 |
| Atrazine-desisopropyl.2 | 4.7  | 174.0 | 67.9  | 1   | 10 | 55 | 30 | Atrazine-desisopropyl-d5.1 |
| Azaconazole.1           | 7.7  | 300.0 | 159.1 | 65  | 10 | 35 | 12 |                            |
| Azaconazole.2           | 7.7  | 300.0 | 231.1 | 65  | 10 | 35 | 12 |                            |
| Azamethiphos.1          | 6.6  | 325.0 | 183.0 | 65  | 10 | 31 | 12 |                            |
| Azamethiphos.2          | 6.6  | 325.0 | 112.0 | 65  | 10 | 39 | 12 |                            |
| Azinphos-ethyl.1        | 9.2  | 346.0 | 132.1 | 50  | 10 | 31 | 15 |                            |
| Azinphos-ethyl.2        | 9.2  | 346.0 | 137.0 | 50  | 10 | 32 | 15 |                            |
| Azinphos-methyl.1       | 8.0  | 318.0 | 132.2 | 56  | 10 | 23 | 12 |                            |
| Azinphos-methyl.2       | 8.0  | 318.0 | 160.2 | 56  | 10 | 13 | 12 |                            |
| Aziprotryne.1           | 8.8  | 226.0 | 156.0 | 65  | 10 | 25 | 12 |                            |



|                             |      |       |       |     |    |    |    |               |
|-----------------------------|------|-------|-------|-----|----|----|----|---------------|
| Aziprotryne.2               | 8.8  | 226.0 | 125.0 | 65  | 10 | 27 | 12 |               |
| Azoxystrobin.1              | 8.2  | 404.1 | 372.1 | 65  | 10 | 19 | 10 |               |
| Azoxystrobin.2              | 8.2  | 404.1 | 344.1 | 65  | 10 | 33 | 10 |               |
| Benalaxyl.1                 | 10.2 | 326.2 | 148.1 | 60  | 10 | 29 | 8  |               |
| Benalaxyl.2                 | 10.2 | 326.2 | 294.1 | 60  | 10 | 15 | 8  |               |
| Bendiocarb.1                | 6.8  | 224.1 | 167.1 | 61  | 10 | 15 | 10 |               |
| Bendiocarb.2                | 6.8  | 224.1 | 109.0 | 61  | 10 | 33 | 6  |               |
| Benflutamid.1               | 9.9  | 356.0 | 91.0  | 111 | 10 | 77 | 10 |               |
| Benflutamid.2               | 9.9  | 356.0 | 162.0 | 111 | 10 | 33 | 20 |               |
| Bensulfuron-metil.1         | 7.2  | 411.1 | 149.1 | 65  | 10 | 35 | 12 |               |
| Bensulfuron-metil.2         | 7.2  | 411.1 | 182.1 | 65  | 10 | 26 | 12 |               |
| Benthiavalicarb-isopropyl.1 | 8.8  | 382.2 | 197.0 | 65  | 10 | 29 | 12 |               |
| Benthiavalicarb-isopropyl.2 | 8.8  | 382.2 | 116.0 | 65  | 10 | 37 | 12 |               |
| Benzolyp-ethyl.1            | 10.3 | 366.0 | 105.0 | 66  | 10 | 17 | 12 |               |
| Benzolyp-ethyl.2            | 10.3 | 366.0 | 320.0 | 66  | 10 | 13 | 20 |               |
| Benzoximate.1               | 10.6 | 364.0 | 199.0 | 31  | 10 | 11 | 12 |               |
| Benzoximate.2               | 10.6 | 364.0 | 105.0 | 31  | 10 | 31 | 6  |               |
| Benzthiazuron.1             | 8.6  | 208.0 | 151.0 | 65  | 10 | 16 | 12 |               |
| Benzthiazuron.2             | 8.6  | 208.0 | 109.0 | 65  | 10 | 16 | 12 |               |
| Bifenazate.1                | 9.1  | 301.1 | 198.1 | 66  | 10 | 13 | 12 |               |
| Bifenazate.2                | 9.1  | 301.1 | 170.1 | 66  | 10 | 27 | 10 |               |
| Bitertanol.1                | 10.6 | 338.2 | 269.2 | 56  | 10 | 13 | 2  |               |
| Bitertanol.2                | 10.6 | 338.2 | 70.0  | 56  | 10 | 29 | 12 |               |
| Boscalid.1                  | 8.6  | 343.0 | 140.0 | 35  | 10 | 25 | 8  | Boscalid-d4.1 |
| Boscalid.2                  | 8.6  | 343.0 | 307.0 | 35  | 10 | 27 | 8  | Boscalid-d4.1 |
| Bromacil.1                  | 6.7  | 261.0 | 205.0 | 65  | 10 | 35 | 12 |               |
| Bromacil.2                  | 6.7  | 261.0 | 188.0 | 65  | 10 | 42 | 12 |               |
| Bromucanazole-Isomer.1.1    | 9.0  | 378.0 | 159.0 | 46  | 10 | 37 | 2  |               |

|                          |      |       |       |    |    |    |    |                  |
|--------------------------|------|-------|-------|----|----|----|----|------------------|
| Bromucanazole-Isomer.1.2 | 9.0  | 378.0 | 70.0  | 46 | 10 | 47 | 6  |                  |
| Bromucanazole-Isomer.2.1 | 9.8  | 378.0 | 159.0 | 46 | 10 | 37 | 2  |                  |
| Bromucanazole-Isomer.2.2 | 9.8  | 378.0 | 70.0  | 46 | 10 | 47 | 6  |                  |
| Bupirimate.1             | 9.7  | 317.0 | 166.1 | 91 | 10 | 33 | 10 |                  |
| Bupirimate.2             | 9.7  | 317.0 | 108.0 | 91 | 10 | 35 | 6  |                  |
| Buprofezin.1             | 11.8 | 306.2 | 201.1 | 56 | 10 | 17 | 12 |                  |
| Buprofezin.2             | 11.8 | 306.2 | 116.2 | 36 | 10 | 23 | 6  |                  |
| Butachlor.1              | 11.9 | 312.2 | 238.2 | 65 | 10 | 21 | 12 |                  |
| Butachlor.2              | 11.9 | 312.2 | 57.3  | 65 | 10 | 46 | 12 |                  |
| Butafenacil.1            | 9.2  | 492.1 | 331.0 | 68 | 10 | 27 | 8  |                  |
| Butafenacil.2            | 9.2  | 492.1 | 349.0 | 68 | 10 | 19 | 10 |                  |
| Butocarboxim.1           | 6.1  | 213.1 | 75.1  | 86 | 10 | 19 | 3  |                  |
| Butocarboxim.2           | 6.1  | 213.1 | 116.0 | 86 | 10 | 17 | 6  |                  |
| Butocarboxim-sulfoxide.1 | 3.1  | 207.0 | 74.9  | 56 | 10 | 19 | 12 |                  |
| Butocarboxim-sulfoxide.2 | 3.1  | 207.0 | 90.0  | 56 | 10 | 19 | 12 |                  |
| Butoxycarboxim.1         | 3.5  | 223.1 | 106.0 | 61 | 10 | 13 | 6  |                  |
| Butoxycarboxim.2         | 3.5  | 223.1 | 166.0 | 61 | 10 | 11 | 10 |                  |
| Buturon.1                | 7.6  | 237.1 | 126.1 | 65 | 10 | 50 | 12 |                  |
| Buturon.2                | 7.6  | 237.1 | 99.0  | 65 | 10 | 50 | 12 |                  |
| Cadusafos.1              | 10.5 | 271.0 | 158.9 | 65 | 10 | 20 | 12 |                  |
| Cadusafos.2              | 10.5 | 271.1 | 130.9 | 65 | 10 | 38 | 12 |                  |
| Carbaryl.1               | 7.0  | 202.1 | 145.0 | 51 | 10 | 13 | 8  | Carbaryl-d7.1    |
| Carbaryl.2               | 7.0  | 202.1 | 127.0 | 51 | 10 | 39 | 32 | Carbaryl-d7.1    |
| Carbendazim.1            | 5.8  | 192.2 | 160.2 | 61 | 10 | 25 | 10 | Carbendazim-d3.1 |
| Carbendazim.2            | 5.8  | 192.2 | 132.1 | 61 | 10 | 41 | 8  | Carbendazim-d3.1 |
| Carbetamide.1            | 6.4  | 237.1 | 192.0 | 56 | 10 | 13 | 12 |                  |
| Carbetamide.2            | 6.4  | 237.1 | 118.1 | 56 | 10 | 17 | 6  |                  |
| Carbofuran.1             | 6.8  | 222.1 | 165.1 | 65 | 10 | 17 | 10 |                  |

|                       |      |       |       |     |    |    |    |                    |
|-----------------------|------|-------|-------|-----|----|----|----|--------------------|
| Carbofuran.2          | 6.8  | 222.1 | 123.0 | 65  | 10 | 29 | 8  |                    |
| Carboxin.1            | 7.0  | 236.1 | 143.0 | 66  | 10 | 21 | 8  |                    |
| Carboxin.2            | 7.0  | 236.1 | 87.0  | 66  | 10 | 33 | 6  |                    |
| Carfentrazon.1        | 10.0 | 429.0 | 366.0 | 106 | 10 | 31 | 18 |                    |
| Carfentrazon.2        | 10.0 | 429.0 | 345.9 | 106 | 10 | 37 | 18 |                    |
| Carfentrazon-ethyl.1  | 9.9  | 412.0 | 346.0 | 91  | 10 | 31 | 6  |                    |
| Carfentrazon-ethyl.2  | 9.9  | 412.0 | 366.0 | 91  | 10 | 25 | 10 |                    |
| Chlorantraniliprole.1 | 7.9  | 484.0 | 452.9 | 61  | 10 | 21 | 12 |                    |
| Chlorantraniliprole.2 | 7.9  | 484.0 | 285.9 | 61  | 10 | 17 | 8  |                    |
| Chlorbromuron.1       | 8.5  | 293.0 | 204.0 | 76  | 10 | 29 | 12 |                    |
| Chlorbromuron.2       | 8.5  | 293.0 | 182.0 | 76  | 10 | 25 | 12 |                    |
| Chlorbufam NH4.1      | 8.3  | 241.0 | 224.0 | 1   | 10 | 9  | 20 |                    |
| Chlorbufam NH4.2      | 8.3  | 241.0 | 171.9 | 1   | 10 | 17 | 8  |                    |
| Chlorbufam.1          | 8.3  | 224.1 | 171.9 | 56  | 10 | 13 | 12 |                    |
| Chlorbufam.2          | 8.3  | 224.1 | 153.9 | 56  | 10 | 25 | 12 |                    |
| Chlorbufam.3          | 8.3  | 224.0 | 172.0 | 1   | 10 | 11 | 10 |                    |
| Chlorbufam.4          | 8.3  | 224.0 | 153.9 | 1   | 10 | 23 | 18 |                    |
| Chlorfenvinphos.1     | 10.3 | 359.0 | 155.0 | 61  | 10 | 19 | 12 |                    |
| Chlorfenvinphos.2     | 10.3 | 358.9 | 99.0  | 61  | 10 | 50 | 12 |                    |
| Chlorfluazuron.1      | 12.8 | 540.0 | 383.0 | 93  | 10 | 27 | 10 |                    |
| Chlorfluazuron.2      | 12.8 | 540.0 | 158.0 | 93  | 10 | 29 | 10 |                    |
| Chloridazon.1         | 5.4  | 222.0 | 51.0  | 111 | 10 | 50 | 24 |                    |
| Chloridazon.2         | 5.4  | 222.0 | 77.0  | 111 | 10 | 55 | 10 |                    |
| Chlorotoluron.1       | 7.3  | 213.1 | 72.2  | 68  | 10 | 31 | 4  | Chlorotoluron-d6.1 |
| Chlorotoluron.2       | 7.3  | 213.1 | 46.2  | 68  | 10 | 35 | 8  | Chlorotoluron-d6.1 |
| Chloroxuron.1         | 9.0  | 291.1 | 72.4  | 81  | 10 | 47 | 4  |                    |
| Chloroxuron.2         | 9.0  | 291.1 | 218.1 | 81  | 10 | 33 | 14 |                    |
| Chlorpyrifos.1        | 12.0 | 349.8 | 197.8 | 56  | 10 | 25 | 54 |                    |

|                       |      |       |       |    |    |    |    |  |
|-----------------------|------|-------|-------|----|----|----|----|--|
| Chlorpyrifos.2        | 12.0 | 349.8 | 96.9  | 56 | 10 | 69 | 12 |  |
| Chlorpyrifos-methyl.1 | 10.7 | 321.9 | 124.9 | 81 | 10 | 29 | 12 |  |
| Chlorpyrifos-methyl.2 | 10.7 | 321.9 | 289.9 | 81 | 10 | 21 | 12 |  |
| Chlorsulfuron.1       | 5.1  | 358.1 | 167.2 | 65 | 10 | 35 | 12 |  |
| Chlorsulfuron.2       | 5.1  | 358.1 | 141.1 | 65 | 10 | 50 | 12 |  |
| Chlorthiophos.1       | 12.5 | 360.9 | 305.0 | 56 | 10 | 20 | 12 |  |
| Chlorthiophos.2       | 12.5 | 360.9 | 192.0 | 56 | 10 | 40 | 12 |  |
| Chromafenozide.1      | 9.1  | 395.1 | 175.0 | 65 | 10 | 22 | 12 |  |
| Chromafenozide.2      | 9.1  | 395.1 | 339.0 | 65 | 10 | 10 | 12 |  |
| Cinosulfuron.1        | 5.1  | 414.1 | 183.2 | 65 | 10 | 29 | 12 |  |
| Cinosulfuron.2        | 5.1  | 414.1 | 157.1 | 65 | 10 | 35 | 12 |  |
| Cirimidine.1          | 6.1  | 172.0 | 136.0 | 61 | 10 | 27 | 16 |  |
| Cirimidine.2          | 6.1  | 172.0 | 107.0 | 56 | 10 | 41 | 12 |  |
| Clethodim-Isomer.1.1  | 7.4  | 360.1 | 164.0 | 51 | 10 | 29 | 10 |  |
| Clethodim-Isomer.1.2  | 7.4  | 360.1 | 268.1 | 51 | 10 | 17 | 18 |  |
| Clethodim-Isomer.2.1  | 9.1  | 360.1 | 164.0 | 51 | 10 | 29 | 10 |  |
| Clethodim-Isomer.2.2  | 9.1  | 360.1 | 268.1 | 51 | 10 | 17 | 18 |  |
| Clofentezine.1        | 10.7 | 303.0 | 138.0 | 56 | 10 | 19 | 8  |  |
| Clofentezine.2        | 10.7 | 303.0 | 102.0 | 56 | 10 | 51 | 6  |  |
| Clomazone.1           | 8.1  | 240.1 | 125.0 | 66 | 10 | 27 | 12 |  |
| Clomazone.2           | 8.1  | 240.1 | 89.1  | 66 | 10 | 65 | 12 |  |
| Cloquintocet-mexyl.1  | 11.8 | 336.2 | 238.0 | 65 | 10 | 23 | 12 |  |
| Cloquintocet-mexyl.2  | 11.8 | 336.2 | 192.1 | 65 | 10 | 38 | 12 |  |
| Clothianidin.1        | 4.9  | 250.0 | 169.0 | 56 | 10 | 19 | 10 |  |
| Clothianidin.2        | 4.9  | 250.0 | 132.0 | 56 | 10 | 21 | 8  |  |
| Coumaphos.1           | 10.2 | 363.0 | 227.0 | 60 | 10 | 35 | 10 |  |
| Coumaphos.2           | 10.2 | 363.0 | 211.1 | 60 | 10 | 53 | 10 |  |
| Cruformat(Ruelene).1  | 9.7  | 292.0 | 108.1 | 65 | 10 | 39 | 12 |  |

|                          |      |       |       |     |    |    |    |                 |
|--------------------------|------|-------|-------|-----|----|----|----|-----------------|
| Cruformat(Ruelene).2     | 9.7  | 292.0 | 236.1 | 65  | 10 | 18 | 12 |                 |
| Cyanazine.1              | 6.5  | 241.1 | 214.1 | 65  | 10 | 35 | 12 |                 |
| Cyanazine.2              | 6.5  | 241.1 | 104.0 | 65  | 10 | 45 | 12 |                 |
| Cyanofenphos.1           | 10.0 | 304.0 | 275.9 | 121 | 10 | 17 | 32 |                 |
| Cyanofenphos.2           | 10.0 | 304.0 | 156.9 | 121 | 10 | 29 | 16 |                 |
| Cyanophos.1              | 7.9  | 261.0 | 125.0 | 65  | 10 | 35 | 12 |                 |
| Cyanophos.2              | 7.9  | 261.0 | 78.9  | 65  | 10 | 50 | 12 |                 |
| Cyantraniliprole.1       | 7.0  | 475.1 | 286.0 | 71  | 10 | 19 | 10 |                 |
| Cyantranilipore.2        | 7.0  | 475.1 | 444.0 | 71  | 10 | 23 | 10 |                 |
| Cyazofamid.1             | 9.4  | 325.2 | 108.0 | 50  | 10 | 18 | 6  |                 |
| Cyazofamid.2             | 9.4  | 325.2 | 261.2 | 50  | 10 | 14 | 6  |                 |
| Cybutrine.1              | 9.6  | 254.3 | 198.0 | 121 | 10 | 25 | 20 |                 |
| Cybutrine.2              | 9.6  | 254.3 | 68.0  | 121 | 10 | 57 | 8  |                 |
| Cyflufenamid.1           | 10.6 | 413.2 | 295.1 | 65  | 10 | 15 | 12 |                 |
| Cyflufenamid.2           | 10.6 | 413.2 | 203.0 | 65  | 10 | 32 | 12 |                 |
| Cymiazole.1              | 9.0  | 219.0 | 144.0 | 1   | 10 | 49 | 20 |                 |
| Cymiazole.2              | 9.0  | 219.0 | 171.0 | 101 | 10 | 37 | 22 |                 |
| Cymoxanil.1              | 5.6  | 198.9 | 128.2 | 56  | 10 | 12 | 7  |                 |
| Cymoxanil.2              | 5.6  | 198.9 | 111.2 | 56  | 10 | 23 | 6  |                 |
| Cyproconazole-Isomer.1.1 | 8.8  | 292.0 | 70.0  | 66  | 10 | 31 | 2  |                 |
| Cyproconazole-Isomer.1.2 | 8.8  | 292.0 | 125.0 | 66  | 10 | 29 | 10 |                 |
| Cyproconazole-Isomer.2.1 | 9.1  | 292.0 | 70.0  | 66  | 10 | 31 | 2  |                 |
| Cyproconazole-Isomer.2.2 | 9.1  | 292.0 | 125.0 | 66  | 10 | 29 | 10 |                 |
| Cyprodinil.1             | 10.2 | 226.0 | 93.0  | 91  | 10 | 47 | 6  |                 |
| Cyprodinil.2             | 10.2 | 226.0 | 77.0  | 91  | 10 | 61 | 4  |                 |
| Cyromazine.1             | 2.9  | 167.1 | 85.1  | 89  | 10 | 26 | 4  | Cyromazine-d4.1 |
| Cyromazine.2             | 2.9  | 167.1 | 125.1 | 89  | 10 | 24 | 7  | Cyromazine-d4.1 |
| Demeton-S.1              | 8.1  | 259.0 | 89.0  | 65  | 10 | 45 | 12 |                 |

|                            |      |       |       |     |    |    |    |                     |
|----------------------------|------|-------|-------|-----|----|----|----|---------------------|
| Demeton-S.2                | 8.1  | 259.0 | 61.1  | 65  | 10 | 52 | 12 |                     |
| Demeton-S-methyl NH4.1     | 7.5  | 230.9 | 61.0  | 46  | 10 | 47 | 12 |                     |
| Demeton-S-methyl NH4.2     | 7.5  | 230.9 | 89.1  | 46  | 10 | 17 | 12 |                     |
| Demeton-S-methylsulphone.1 | 4.2  | 263.0 | 168.9 | 61  | 10 | 23 | 14 |                     |
| Demeton-S-methylsulphone.2 | 4.2  | 262.9 | 108.9 | 106 | 10 | 37 | 10 |                     |
| Demeton-S-sulfone.1        | 5.7  | 291.0 | 121.0 | 61  | 10 | 23 | 14 |                     |
| Demeton-S-sulfone.2        | 5.7  | 291.0 | 197.0 | 61  | 10 | 23 | 10 |                     |
| Demeton-S-sulfoxide.1      | 5.6  | 275.0 | 197.0 | 61  | 10 | 23 | 10 |                     |
| Demeton-S-sulfoxide.2      | 5.6  | 275.0 | 105.0 | 61  | 10 | 23 | 14 |                     |
| Desmedipham.1              | 7.8  | 318.1 | 182.0 | 36  | 10 | 19 | 12 |                     |
| Desmedipham.2              | 7.8  | 318.1 | 154.0 | 36  | 10 | 35 | 26 |                     |
| Desmetryn.1                | 7.5  | 214.1 | 172.2 | 65  | 10 | 35 | 12 |                     |
| Desmetryn.2                | 7.5  | 214.1 | 82.0  | 65  | 10 | 50 | 12 |                     |
| Diafenthiuron.1            | 12.6 | 385.2 | 328.8 | 116 | 10 | 31 | 14 |                     |
| Diafenthiuron.2            | 12.6 | 385.2 | 286.8 | 116 | 10 | 37 | 14 |                     |
| Diallát.1                  | 11.3 | 270.0 | 109.0 | 65  | 10 | 50 | 12 |                     |
| Diallát.2                  | 11.3 | 270.0 | 228.0 | 65  | 10 | 20 | 12 |                     |
| Diazinon.1                 | 10.3 | 305.1 | 169.1 | 61  | 10 | 29 | 14 | Diazinon-d10.1      |
| Diazinon.2                 | 10.3 | 305.1 | 97.0  | 61  | 10 | 41 | 14 | Diazinon-d10.1      |
| Dichlorvos.1               | 6.7  | 220.8 | 109.1 | 60  | 10 | 35 | 14 | Dichlorvos-d6.1     |
| Dichlorvos.2               | 6.7  | 220.8 | 94.9  | 60  | 10 | 50 | 14 | Dichlorvos-d6.1     |
| Diclobutrazol.1            | 9.9  | 328.2 | 70.2  | 70  | 10 | 48 | 3  |                     |
| Diclobutrazol.2            | 9.9  | 328.2 | 59.1  | 70  | 10 | 48 | 2  |                     |
| Dicrotophos.1              | 4.8  | 238.1 | 193.0 | 61  | 10 | 13 | 12 |                     |
| Dicrotophos.2              | 4.8  | 238.1 | 112.1 | 61  | 10 | 17 | 6  |                     |
| Diethofencarb.1            | 8.3  | 268.1 | 226.1 | 61  | 10 | 13 | 14 |                     |
| Diethofencarb.2            | 8.3  | 268.1 | 124.0 | 61  | 10 | 43 | 8  |                     |
| Difenoconazole-Isomer.1.1  | 10.8 | 408.2 | 253.1 | 46  | 10 | 31 | 6  | Difenoconazole-d4.1 |

|                           |      |       |       |     |    |    |    |                     |
|---------------------------|------|-------|-------|-----|----|----|----|---------------------|
| Difenoconazole-Isomer.1.2 | 10.8 | 406.1 | 251.1 | 46  | 10 | 41 | 2  | Difenoconazole-d4.1 |
| Difenoхuron.1             | 7.6  | 287.0 | 72.0  | 96  | 10 | 47 | 12 |                     |
| Difenoхuron.2             | 7.6  | 287.0 | 123.0 | 96  | 10 | 29 | 12 |                     |
| Diflubenzuron.1           | 9.6  | 311.0 | 158.2 | 61  | 10 | 19 | 10 |                     |
| Diflubenzuron.2           | 9.6  | 311.0 | 141.1 | 61  | 10 | 43 | 8  |                     |
| Diflufenican.1            | 11.1 | 395.0 | 266.0 | 65  | 10 | 35 | 12 | Diflufenican-d3.1   |
| Diflufenican.2            | 11.1 | 395.0 | 246.0 | 65  | 10 | 23 | 12 | Diflufenican-d3.1   |
| Dimefox.1                 | 4.8  | 155.1 | 110.0 | 71  | 10 | 25 | 12 |                     |
| Dimefox.2                 | 4.8  | 155.1 | 44.0  | 71  | 10 | 39 | 20 |                     |
| Dimefuron.1               | 8.0  | 339.0 | 72.0  | 136 | 10 | 41 | 12 |                     |
| Dimefuron.2               | 8.0  | 339.0 | 167.0 | 136 | 10 | 31 | 12 |                     |
| Dimethachlor.1            | 7.9  | 256.0 | 224.0 | 71  | 10 | 17 | 26 |                     |
| Dimethachlor.2            | 7.9  | 256.0 | 148.1 | 71  | 10 | 33 | 14 |                     |
| Dimethenamid.1            | 8.5  | 275.9 | 244.0 | 71  | 10 | 19 | 26 |                     |
| Dimethenamid.2            | 8.5  | 275.9 | 168.1 | 71  | 10 | 31 | 18 |                     |
| Dimethirimol.1            | 7.4  | 210.1 | 71.1  | 65  | 10 | 47 | 12 |                     |
| Dimethirimol.2            | 7.4  | 210.1 | 140.0 | 65  | 10 | 38 | 12 |                     |
| Dimethoate.1              | 5.3  | 230.0 | 199.0 | 46  | 10 | 13 | 12 | Dimethoate-d6.1     |
| Dimethoate.2              | 5.3  | 230.0 | 125.0 | 46  | 10 | 29 | 8  | Dimethoate-d6.1     |
| Dimethomorph-Isomer.1.1   | 8.3  | 388.1 | 301.0 | 75  | 10 | 29 | 0  |                     |
| Dimethomorph-Isomer.1.2   | 8.3  | 388.1 | 165.1 | 75  | 10 | 45 | 10 |                     |
| Dimethomorph-Isomer.2.1   | 8.7  | 388.1 | 301.0 | 75  | 10 | 29 | 0  |                     |
| Dimethomorph-Isomer.2.2   | 8.7  | 388.1 | 165.1 | 75  | 10 | 45 | 10 |                     |
| Dimoxystrobin.1           | 9.8  | 327.1 | 116.0 | 66  | 10 | 29 | 6  |                     |
| Dimoxystrobin.2           | 9.8  | 327.1 | 205.0 | 66  | 10 | 23 | 14 |                     |
| Diniconazole.1            | 10.7 | 326.2 | 70.2  | 72  | 10 | 50 | 3  |                     |
| Diniconazole.2            | 10.7 | 326.2 | 159.0 | 72  | 10 | 43 | 10 |                     |
| Dinotefuran.1             | 3.3  | 203.1 | 157.2 | 51  | 10 | 17 | 10 |                     |

|                         |      |       |       |     |    |    |    |  |
|-------------------------|------|-------|-------|-----|----|----|----|--|
| Dinotefuran.2           | 3.3  | 203.1 | 129.2 | 51  | 10 | 11 | 8  |  |
| Dioxacarb.1             | 5.3  | 224.1 | 167.0 | 51  | 10 | 11 | 10 |  |
| Dioxacarb.2             | 5.3  | 224.1 | 123.0 | 51  | 10 | 21 | 18 |  |
| Diphenamid.1            | 7.9  | 240.1 | 134.1 | 65  | 10 | 28 | 12 |  |
| Diphenamid.2            | 7.9  | 240.1 | 167.1 | 65  | 10 | 25 | 12 |  |
| Dipropetryn.1           | 10.1 | 256.0 | 214.0 | 121 | 10 | 27 | 12 |  |
| Dipropetryn.2           | 10.1 | 256.0 | 144.0 | 116 | 10 | 37 | 16 |  |
| Disulfoton NH4.1        | 10.8 | 292.0 | 275.1 | 56  | 10 | 5  | 20 |  |
| Disulfoton NH4.2        | 10.8 | 292.0 | 88.9  | 56  | 10 | 13 | 12 |  |
| Disulfoton.1            | 10.8 | 275.1 | 61.0  | 56  | 10 | 56 | 12 |  |
| Disulfoton.2            | 10.8 | 275.1 | 89.0  | 56  | 10 | 35 | 12 |  |
| Disulfoton.3            | 10.8 | 274.9 | 89.1  | 1   | 10 | 11 | 14 |  |
| Disulfoton.4            | 10.8 | 274.9 | 60.9  | 1   | 10 | 47 | 8  |  |
| Disulfoton-sulfone.1    | 7.4  | 307.1 | 171.0 | 60  | 10 | 27 | 12 |  |
| Disulfoton-sulfone.2    | 7.4  | 307.1 | 153.0 | 60  | 10 | 32 | 12 |  |
| Disulfoton-sulfoxide.1  | 7.3  | 291.1 | 212.9 | 60  | 10 | 22 | 12 |  |
| Disulfoton-sulfoxide.2  | 7.3  | 291.1 | 185.0 | 60  | 10 | 32 | 12 |  |
| Diuron.1                | 7.7  | 233.1 | 72.0  | 71  | 10 | 37 | 14 |  |
| Diuron.2                | 7.7  | 235.1 | 72.1  | 66  | 10 | 33 | 4  |  |
| DMST.1                  | 6.9  | 215.2 | 78.9  | 65  | 10 | 50 | 12 |  |
| DMST.2                  | 6.9  | 215.2 | 106.0 | 65  | 10 | 44 | 12 |  |
| Dodemorph.1             | 13.9 | 282.1 | 116.0 | 65  | 10 | 35 | 12 |  |
| Dodemorph.2             | 13.9 | 282.1 | 98.0  | 65  | 10 | 50 | 12 |  |
| Dodine.1                | 10.4 | 228.3 | 57.0  | 91  | 10 | 41 | 10 |  |
| Dodine.2                | 10.4 | 228.3 | 186.2 | 91  | 10 | 27 | 10 |  |
| Doramectin.1            | 13.9 | 916.6 | 331.4 | 61  | 10 | 33 | 8  |  |
| Doramectin.2            | 13.9 | 916.6 | 593.5 | 66  | 10 | 19 | 20 |  |
| Eamectin-benzoate b1a.1 | 12.4 | 886.5 | 158.1 | 106 | 10 | 49 | 10 |  |



|                          |      |       |       |     |    |     |    |  |
|--------------------------|------|-------|-------|-----|----|-----|----|--|
| Emamectin-benzoate b1a.2 | 12.4 | 886.5 | 82.1  | 106 | 10 | 107 | 6  |  |
| Emamectin-benzoate b1b.1 | 12.1 | 872.6 | 158.2 | 101 | 10 | 51  | 10 |  |
| Emamectin-benzoate b1b.2 | 12.1 | 872.6 | 302.3 | 101 | 10 | 43  | 26 |  |
| Epoxiconazole.1          | 9.4  | 330.0 | 121.1 | 41  | 10 | 49  | 10 |  |
| Epoxiconazole.2          | 9.4  | 330.0 | 101.1 | 41  | 10 | 69  | 2  |  |
| Etaconazole-Isomer.1.1   | 9.4  | 328.1 | 159.0 | 91  | 10 | 31  | 12 |  |
| Etaconazole-Isomer.1.2   | 9.4  | 328.1 | 205.0 | 91  | 10 | 23  | 6  |  |
| Etaconazole-Isomer.2.1   | 9.8  | 328.1 | 159.0 | 91  | 10 | 31  | 12 |  |
| Etaconazole-Isomer.2.2   | 9.8  | 328.1 | 205.0 | 91  | 10 | 23  | 6  |  |
| Ethidimuron.1            | 5.0  | 265.0 | 208.1 | 65  | 10 | 14  | 12 |  |
| Ethidimuron.2            | 5.0  | 265.0 | 114.0 | 65  | 10 | 36  | 12 |  |
| Ethiofencarb.1           | 7.2  | 226.1 | 107.2 | 56  | 10 | 21  | 6  |  |
| Ethiofencarb.2           | 7.2  | 226.1 | 164.0 | 56  | 10 | 21  | 6  |  |
| Ethiofencarb-sulfone.1   | 4.8  | 275.0 | 107.1 | 56  | 10 | 29  | 12 |  |
| Ethiofencarb-sulfone.2   | 4.8  | 275.0 | 201.1 | 56  | 10 | 17  | 12 |  |
| Ethiofencarb-sulfoxide.1 | 4.9  | 242.0 | 107.0 | 71  | 10 | 13  | 12 |  |
| Ethiofencarb-sulfoxide.2 | 4.9  | 242.0 | 185.1 | 71  | 10 | 23  | 12 |  |
| Ethion.1                 | 12.0 | 385.0 | 143.0 | 65  | 10 | 35  | 12 |  |
| Ethion.2                 | 12.0 | 385.0 | 96.9  | 65  | 10 | 50  | 12 |  |
| Ethiprole.1              | 8.4  | 397.3 | 255.2 | 96  | 10 | 47  | 16 |  |
| Ethiprole.2              | 8.4  | 397.3 | 350.9 | 96  | 10 | 27  | 10 |  |
| Ethirimol.1              | 7.7  | 210.2 | 140.1 | 96  | 10 | 31  | 8  |  |
| Ethirimol.2              | 7.7  | 210.2 | 98.1  | 96  | 10 | 39  | 12 |  |
| Ethofumesate.1           | 8.3  | 287.1 | 259.1 | 76  | 10 | 15  | 6  |  |
| Ethofumesate.2           | 8.3  | 287.1 | 121.1 | 76  | 10 | 23  | 6  |  |
| Ethoprophos.1            | 9.4  | 243.0 | 131.0 | 66  | 10 | 32  | 12 |  |
| Ethoprophos.2            | 9.4  | 243.0 | 97.0  | 66  | 10 | 30  | 12 |  |
| Ethoxyquin.1             | 9.5  | 218.1 | 174.0 | 86  | 10 | 39  | 12 |  |

|                        |      |       |       |    |    |    |    |  |
|------------------------|------|-------|-------|----|----|----|----|--|
| Ethoxyquin.2           | 9.5  | 218.1 | 160.0 | 86 | 10 | 47 | 12 |  |
| Etofenprox NH4.1       | 13.9 | 394.0 | 177.0 | 51 | 10 | 21 | 14 |  |
| Etofenprox NH4.2       | 13.9 | 394.0 | 107.0 | 51 | 10 | 61 | 18 |  |
| Etoxazole.1            | 12.4 | 360.1 | 141.0 | 31 | 10 | 59 | 8  |  |
| Etoxazole.2            | 12.4 | 360.1 | 57.2  | 31 | 10 | 51 | 10 |  |
| Etrimfos.1             | 10.1 | 293.1 | 265.1 | 65 | 10 | 22 | 12 |  |
| Etrimfos.2             | 10.1 | 293.1 | 125.0 | 65 | 10 | 35 | 12 |  |
| Famoxadone.1           | 10.3 | 392.0 | 331.0 | 46 | 10 | 13 | 10 |  |
| Famoxadone.2           | 10.3 | 392.0 | 238.0 | 46 | 10 | 23 | 16 |  |
| Fenamidone.1           | 8.5  | 312.1 | 92.0  | 36 | 10 | 35 | 6  |  |
| Fenamidone.2           | 8.5  | 312.1 | 236.1 | 36 | 10 | 21 | 14 |  |
| Fenamiphos.1           | 9.7  | 304.0 | 217.0 | 81 | 10 | 37 | 18 |  |
| Fenamiphos.2           | 9.7  | 304.0 | 202.0 | 86 | 10 | 49 | 10 |  |
| Fenamiphos-sulfone.1   | 6.9  | 336.0 | 266.0 | 81 | 10 | 29 | 22 |  |
| Fenamiphos-sulfone.2   | 6.9  | 336.0 | 308.0 | 81 | 10 | 23 | 8  |  |
| Fenamiphos-sulfoxide.1 | 6.8  | 320.0 | 233.0 | 81 | 10 | 37 | 20 |  |
| Fenamiphos-sulfoxide.2 | 6.8  | 320.0 | 171.0 | 76 | 10 | 33 | 14 |  |
| Fenarimol.1            | 9.2  | 331.0 | 268.0 | 81 | 10 | 35 | 26 |  |
| Fenarimol.2            | 9.2  | 331.0 | 81.0  | 81 | 10 | 55 | 14 |  |
| Fenazaquin.1           | 13.2 | 307.1 | 161.1 | 76 | 10 | 27 | 10 |  |
| Fenazaquin.2           | 13.2 | 307.1 | 147.0 | 76 | 10 | 25 | 8  |  |
| Fenbuconazole.1        | 9.5  | 337.0 | 124.9 | 61 | 10 | 55 | 14 |  |
| Fenbuconazole.2        | 9.5  | 337.0 | 70.0  | 61 | 10 | 39 | 6  |  |
| Fenfuram.1             | 7.0  | 202.1 | 109.1 | 65 | 10 | 45 | 12 |  |
| Fenfuram.2             | 7.0  | 202.1 | 91.8  | 65 | 10 | 50 | 12 |  |
| Fenhexamid.1           | 9.2  | 302.0 | 97.0  | 95 | 10 | 33 | 6  |  |
| Fenhexamid.2           | 9.2  | 302.0 | 55.0  | 95 | 10 | 61 | 10 |  |
| Fenitrothion.1         | 8.9  | 278.1 | 169.1 | 60 | 10 | 30 | 12 |  |

|                              |      |       |       |     |    |    |    |  |
|------------------------------|------|-------|-------|-----|----|----|----|--|
| Fenitrothion.2               | 8.9  | 278.1 | 125.0 | 60  | 10 | 45 | 12 |  |
| Fenitrothion.3               | 8.9  | 277.9 | 124.9 | 41  | 10 | 25 | 14 |  |
| Fenitrothion.4               | 8.9  | 277.9 | 136.0 | 41  | 10 | 15 | 16 |  |
| Fenobucarb.1                 | 8.2  | 208.2 | 95.3  | 61  | 10 | 19 | 6  |  |
| Fenobucarb.2                 | 8.2  | 208.2 | 152.1 | 61  | 10 | 13 | 8  |  |
| Fenoxaprop-P-ethyl.1         | 11.5 | 362.1 | 288.0 | 65  | 10 | 32 | 12 |  |
| Fenoxaprop-P-ethyl.2         | 11.5 | 362.1 | 91.9  | 65  | 10 | 50 | 12 |  |
| Fenoxycarb.1                 | 9.7  | 302.1 | 116.1 | 61  | 10 | 17 | 6  |  |
| Fenoxycarb.2                 | 9.7  | 302.1 | 88.0  | 61  | 10 | 29 | 6  |  |
| Fenpropimorph.1              | 13.8 | 304.0 | 147.0 | 141 | 10 | 39 | 12 |  |
| Fenpropimorph.2              | 13.8 | 304.0 | 117.0 | 141 | 10 | 73 | 2  |  |
| Fenpyroximate.1              | 12.7 | 422.0 | 366.1 | 88  | 10 | 23 | 10 |  |
| Fenpyroximate.2              | 12.7 | 422.0 | 135.1 | 88  | 10 | 53 | 8  |  |
| Fensulfothion.1              | 7.6  | 309.1 | 280.8 | 65  | 10 | 18 | 12 |  |
| Fensulfothion.2              | 7.6  | 309.1 | 252.9 | 65  | 10 | 22 | 12 |  |
| Fensulfothion-oxon.1         | 6.0  | 293.0 | 237.0 | 65  | 10 | 19 | 12 |  |
| Fensulfothion-oxon.2         | 6.0  | 293.0 | 265.0 | 65  | 10 | 14 | 12 |  |
| Fensulfothion-oxon-sulfone.1 | 6.2  | 309.0 | 253.0 | 65  | 10 | 16 | 12 |  |
| Fensulfothion-oxon-sulfone.2 | 6.2  | 309.0 | 175.0 | 65  | 10 | 27 | 12 |  |
| Fensulfothion-sulfone.1      | 7.7  | 325.1 | 268.9 | 65  | 10 | 17 | 12 |  |
| Fensulfothion-sulfone.2      | 7.7  | 325.1 | 297.0 | 65  | 10 | 20 | 12 |  |
| Fenthion.1                   | 10.1 | 279.1 | 169.1 | 65  | 10 | 35 | 12 |  |
| Fenthion.2                   | 10.1 | 279.1 | 105.1 | 65  | 10 | 50 | 12 |  |
| Fenthion-oxon-sulfone.1      | 5.6  | 295.1 | 217.2 | 120 | 10 | 15 | 10 |  |
| Fenthion-oxon-sulfone.2      | 5.6  | 295.1 | 78.1  | 120 | 10 | 40 | 10 |  |
| Fenthion-oxon-sulfoxide.1    | 5.4  | 279.1 | 264.2 | 130 | 10 | 15 | 10 |  |
| Fenthion-oxon-sulfoxide.2    | 5.4  | 279.1 | 104.2 | 130 | 10 | 25 | 10 |  |
| Fenthion-sulfone.1           | 7.0  | 311.1 | 125.0 | 65  | 10 | 28 | 12 |  |

|                      |      |       |       |     |    |    |    |                 |
|----------------------|------|-------|-------|-----|----|----|----|-----------------|
| Fenthion-sulfone.2   | 7.0  | 311.0 | 109.0 | 65  | 10 | 39 | 12 |                 |
| Fenthion-sulfoxid.1  | 6.9  | 295.1 | 279.7 | 76  | 10 | 25 | 16 |                 |
| Fenthion-sulfoxid.2  | 6.9  | 295.1 | 108.9 | 76  | 10 | 45 | 18 |                 |
| Fenuron.1            | 5.1  | 165.1 | 72.1  | 55  | 10 | 45 | 4  |                 |
| Fenuron.2            | 5.1  | 165.1 | 46.0  | 55  | 10 | 29 | 8  |                 |
| Fipronil.1           | 9.7  | 437.1 | 368.0 | 96  | 10 | 23 | 9  | Fipronil-13C3.1 |
| Fipronil.2           | 9.7  | 437.1 | 290.0 | 96  | 10 | 37 | 7  | Fipronil-13C3.1 |
| Flamprop-isopropyl.1 | 10.2 | 364.1 | 105.0 | 65  | 10 | 50 | 12 |                 |
| Flamprop-isopropyl.2 | 10.2 | 364.1 | 304.0 | 65  | 10 | 20 | 12 |                 |
| Flamprop-methyl.1    | 8.9  | 336.0 | 105.0 | 65  | 10 | 46 | 12 |                 |
| Flamprop-methyl.2    | 8.9  | 336.0 | 77.0  | 65  | 10 | 50 | 12 |                 |
| Flazasulfuron.1      | 5.3  | 408.1 | 182.1 | 65  | 10 | 35 | 12 |                 |
| Flazasulfuron.2      | 5.3  | 408.1 | 139.0 | 65  | 10 | 60 | 12 |                 |
| Flonicamid.1         | 4.1  | 230.1 | 203.1 | 71  | 10 | 23 | 12 |                 |
| Flonicamid.2         | 4.1  | 230.1 | 174.0 | 71  | 10 | 25 | 10 |                 |
| Florasulam.1         | 5.1  | 360.0 | 129.1 | 65  | 10 | 50 | 12 |                 |
| Florasulam.2         | 5.1  | 360.0 | 109.0 | 65  | 10 | 20 | 12 |                 |
| Fluazifop.1          | 7.0  | 328.1 | 282.0 | 65  | 10 | 35 | 12 |                 |
| Fluazifop.2          | 7.0  | 328.1 | 254.0 | 65  | 10 | 43 | 12 |                 |
| Fluazuron.1          | 12.2 | 505.9 | 348.9 | 151 | 10 | 27 | 30 |                 |
| Fluazuron.2          | 12.2 | 505.9 | 140.9 | 151 | 10 | 83 | 20 |                 |
| Flubendiamide.1      | 9.9  | 683.1 | 408.0 | 85  | 10 | 9  | 12 |                 |
| Flubendiamide.2      | 9.9  | 683.1 | 274.1 | 85  | 10 | 41 | 6  |                 |
| Fludioxinil.1        | 8.4  | 266.0 | 229.0 | 41  | 10 | 17 | 14 |                 |
| Fludioxinil.2        | 8.4  | 266.0 | 227.1 | 41  | 10 | 11 | 12 |                 |
| Flufenacet.1         | 9.3  | 364.1 | 152.1 | 36  | 10 | 27 | 8  |                 |
| Flufenacet.2         | 9.3  | 364.1 | 194.2 | 36  | 10 | 17 | 12 |                 |
| Flufenoxuron.1       | 12.4 | 489.0 | 158.0 | 96  | 10 | 27 | 10 |                 |

|                     |      |       |       |     |    |    |    |                |
|---------------------|------|-------|-------|-----|----|----|----|----------------|
| Flufenoxuron.2      | 12.4 | 489.0 | 141.1 | 96  | 10 | 63 | 8  |                |
| Fluometuron.1       | 7.2  | 233.1 | 72.1  | 76  | 10 | 35 | 12 |                |
| Fluometuron.2       | 7.2  | 233.1 | 46.0  | 76  | 10 | 37 | 8  |                |
| Fluopicolide.1      | 8.7  | 383.0 | 173.0 | 66  | 10 | 31 | 14 |                |
| Fluopicolide.2      | 8.7  | 383.0 | 145.0 | 66  | 10 | 71 | 12 |                |
| Fluopyram.1         | 9.1  | 396.7 | 208.0 | 15  | 10 | 29 | 24 | Fluopyram-d4.1 |
| Fluopyram.2         | 9.1  | 396.7 | 173.0 | 15  | 10 | 35 | 20 | Fluopyram-d4.1 |
| Fluoxastrobin.1     | 9.1  | 459.2 | 427.2 | 81  | 10 | 23 | 12 |                |
| Fluoxastrobin.2     | 9.1  | 459.2 | 188.0 | 81  | 10 | 47 | 10 |                |
| Fluquinconazole.1   | 9.1  | 376.0 | 307.0 | 86  | 10 | 27 | 16 |                |
| Fluquinconazole.2   | 9.1  | 376.0 | 349.0 | 86  | 10 | 29 | 20 |                |
| Fluridone.1         | 8.0  | 330.1 | 309.1 | 65  | 10 | 50 | 12 |                |
| Fluridone.2         | 8.0  | 330.1 | 290.0 | 65  | 10 | 50 | 12 |                |
| Fluroxypyr.1        | 4.2  | 254.9 | 208.8 | 65  | 10 | 22 | 12 |                |
| Fluroxypyr.2        | 4.2  | 254.9 | 180.8 | 65  | 10 | 28 | 12 |                |
| Flurtamone.1        | 8.0  | 334.1 | 247.2 | 65  | 10 | 35 | 12 |                |
| Flurtamone.2        | 8.0  | 334.1 | 178.2 | 65  | 10 | 50 | 12 |                |
| Flusilazole.1       | 9.6  | 316.1 | 165.1 | 86  | 10 | 37 | 10 |                |
| Flusilazole.2       | 9.6  | 316.1 | 247.1 | 86  | 10 | 21 | 18 |                |
| Fluthiacet-methyl.1 | 9.9  | 404.0 | 274.2 | 65  | 10 | 39 | 12 |                |
| Fluthiacet-methyl.2 | 9.9  | 404.0 | 215.0 | 65  | 10 | 50 | 12 |                |
| Flutolanil.1        | 8.7  | 324.1 | 242.1 | 75  | 10 | 35 | 14 |                |
| Flutolanil.2        | 8.7  | 324.1 | 262.1 | 75  | 10 | 31 | 16 |                |
| Flutriafol.1        | 7.5  | 302.1 | 70.1  | 16  | 10 | 59 | 2  |                |
| Flutriafol.2        | 7.5  | 302.1 | 123.0 | 16  | 10 | 37 | 2  |                |
| Fluxapyroxad.1      | 8.7  | 382.0 | 362.0 | 156 | 10 | 21 | 28 |                |
| Fluxapyroxad.2      | 8.7  | 382.0 | 342.0 | 156 | 10 | 27 | 54 |                |
| FomesafenNH4.1      | 7.7  | 456.1 | 344.0 | 65  | 10 | 23 | 12 |                |

|                           |      |       |       |    |    |    |    |  |
|---------------------------|------|-------|-------|----|----|----|----|--|
| FomesafenNH4.2            | 7.7  | 456.1 | 223.1 | 65 | 10 | 46 | 12 |  |
| Fonofos.1                 | 10.3 | 247.0 | 137.0 | 65 | 10 | 15 | 12 |  |
| Fonofos.2                 | 10.3 | 247.0 | 109.0 | 65 | 10 | 35 | 12 |  |
| Foramsulfuron.1           | 5.2  | 453.0 | 182.0 | 65 | 10 | 31 | 12 |  |
| Foramsulfuron.2           | 5.2  | 453.0 | 272.0 | 65 | 10 | 20 | 12 |  |
| Forchlorfenuron.1         | 7.6  | 248.0 | 129.1 | 71 | 10 | 25 | 8  |  |
| Forchlorfenuron.2         | 7.6  | 248.0 | 93.1  | 71 | 10 | 49 | 6  |  |
| Formetanate HCl.1         | 4.4  | 222.1 | 165.0 | 66 | 10 | 23 | 10 |  |
| Formetanate HCl.2         | 4.4  | 222.1 | 120.0 | 66 | 10 | 37 | 8  |  |
| Fosthiazat.1              | 7.2  | 284.1 | 227.9 | 56 | 10 | 15 | 14 |  |
| Fosthiazat.2              | 7.2  | 284.1 | 104.0 | 56 | 10 | 31 | 6  |  |
| Fuberidazole.1            | 6.5  | 185.0 | 157.0 | 86 | 10 | 37 | 8  |  |
| Fuberidazole.2            | 6.5  | 185.0 | 65.0  | 86 | 10 | 57 | 12 |  |
| Furalaxyl.1               | 8.2  | 302.1 | 242.1 | 51 | 10 | 21 | 16 |  |
| Furalaxyl.2               | 8.2  | 302.1 | 95.0  | 51 | 10 | 39 | 8  |  |
| Furathiocarb.1            | 11.6 | 383.1 | 195.1 | 86 | 10 | 25 | 12 |  |
| Furathiocarb.2            | 11.6 | 383.1 | 252.1 | 86 | 10 | 17 | 6  |  |
| Halofenozide.1            | 8.4  | 331.2 | 275.1 | 30 | 10 | 11 | 8  |  |
| Halofenozide.2            | 8.4  | 331.2 | 105.0 | 30 | 10 | 23 | 6  |  |
| Haloxifop.1               | 8.1  | 362.2 | 316.2 | 65 | 10 | 35 | 12 |  |
| Haloxifop.2               | 8.1  | 362.2 | 272.2 | 65 | 10 | 50 | 12 |  |
| Haloxifop-2-ethoxyethyl.1 | 11.5 | 434.0 | 316.0 | 65 | 10 | 35 | 12 |  |
| Haloxifop-2-ethoxyethyl.2 | 11.5 | 434.0 | 272.0 | 65 | 10 | 50 | 12 |  |
| Haloxifop-P-methyl.1      | 11.0 | 376.0 | 316.0 | 65 | 10 | 35 | 12 |  |
| Haloxifop-P-methyl.2      | 11.0 | 376.0 | 272.0 | 65 | 10 | 50 | 12 |  |
| Heptenophos.1             | 7.7  | 251.0 | 127.0 | 65 | 10 | 25 | 12 |  |
| Heptenophos.2             | 7.7  | 251.0 | 125.0 | 65 | 10 | 32 | 12 |  |
| Hexaconazole.1            | 10.4 | 314.1 | 70.0  | 81 | 10 | 55 | 6  |  |

|                     |      |       |       |     |    |    |    |                   |
|---------------------|------|-------|-------|-----|----|----|----|-------------------|
| Hexaconazole.2      | 10.4 | 314.1 | 159.0 | 81  | 10 | 33 | 10 |                   |
| Hexaflumuron.1      | 11.1 | 461.1 | 158.2 | 85  | 10 | 23 | 10 |                   |
| Hexaflumuron.2      | 11.1 | 461.1 | 141.1 | 85  | 10 | 57 | 8  |                   |
| Hexazonon(Velpar).1 | 6.8  | 253.1 | 171.1 | 116 | 10 | 23 | 10 |                   |
| Hexazonon(Velpar).2 | 6.8  | 253.1 | 71.0  | 116 | 10 | 41 | 10 |                   |
| Hexythiazox.1       | 12.2 | 353.1 | 228.0 | 41  | 10 | 19 | 14 |                   |
| Hexythiazox.2       | 12.2 | 353.1 | 168.0 | 41  | 10 | 37 | 12 |                   |
| Hydramethylnon.1    | 11.1 | 495.2 | 323.2 | 136 | 10 | 41 | 10 |                   |
| Hydramethylnon.2    | 11.1 | 495.2 | 151.1 | 136 | 10 | 77 | 2  |                   |
| Hydroxycarbofuran.1 | 5.3  | 238.0 | 181.1 | 106 | 10 | 15 | 10 |                   |
| Hydroxycarbofuran.2 | 5.3  | 238.0 | 163.0 | 106 | 10 | 21 | 20 |                   |
| Imazalil.1          | 10.0 | 297.0 | 159.0 | 81  | 10 | 29 | 12 |                   |
| Imazalil.2          | 10.0 | 297.0 | 201.0 | 81  | 10 | 25 | 12 |                   |
| Imazaquin.1         | 5.0  | 312.0 | 199.1 | 61  | 10 | 35 | 12 |                   |
| Imazaquin.2         | 5.0  | 312.1 | 181.2 | 61  | 10 | 50 | 12 |                   |
| Imidacloprid.1      | 4.9  | 256.0 | 209.1 | 61  | 10 | 21 | 14 | Imidacloprid-d4.1 |
| Imidacloprid.2      | 4.9  | 256.0 | 175.1 | 61  | 10 | 25 | 10 | Imidacloprid-d4.1 |
| Indoxacarb.1        | 10.8 | 528.0 | 203.0 | 55  | 10 | 47 | 12 |                   |
| Indoxacarb.2        | 10.8 | 528.0 | 218.0 | 55  | 10 | 35 | 16 |                   |
| Indoxacarb.3        | 10.8 | 528.0 | 249.0 | 55  | 10 | 27 | 18 |                   |
| Indoxacarb.4        | 10.8 | 528.0 | 150.0 | 55  | 10 | 27 | 20 |                   |
| Ipconazole.1        | 11.1 | 334.2 | 70.0  | 81  | 10 | 37 | 12 |                   |
| Ipconazole.2        | 11.1 | 334.2 | 125.0 | 101 | 10 | 47 | 12 |                   |
| Iprobenfos.1        | 9.9  | 289.1 | 205.0 | 61  | 10 | 17 | 12 |                   |
| Iprobenfos.2        | 9.9  | 289.1 | 91.0  | 61  | 10 | 35 | 12 |                   |
| Iprodione.1         | 9.7  | 330.1 | 244.9 | 61  | 10 | 21 | 14 |                   |
| Iprodione.2         | 9.7  | 332.1 | 246.9 | 61  | 10 | 21 | 14 |                   |
| Iprovalicarb.1      | 9.2  | 321.2 | 203.1 | 61  | 10 | 13 | 14 |                   |

|                        |      |       |       |       |    |    |    |  |
|------------------------|------|-------|-------|-------|----|----|----|--|
| Iprovalicarb.2         | 9.2  | 321.2 | 119.0 | 61    | 10 | 47 | 8  |  |
| Isocarbamide.1         | 5.7  | 186.0 | 86.9  | 56    | 10 | 37 | 12 |  |
| Isocarbamide.2         | 5.7  | 186.0 | 130.2 | 56    | 10 | 20 | 12 |  |
| Isocarbophos.1         | 7.8  | 307.0 | 231.1 | 32    | 10 | 19 | 5  |  |
| Isocarbophos.2         | 7.8  | 307.0 | 121.1 | 32    | 10 | 42 | 7  |  |
| Isofenphos.1           | 10.6 | 346.1 | 217.1 | 61    | 10 | 35 | 12 |  |
| Isofenphos.2           | 10.6 | 346.1 | 245.1 | 61    | 10 | 25 | 12 |  |
| Isofenphos-methyl Na.1 | 9.9  | 354.0 | 252.9 | 156   | 10 | 23 | 16 |  |
| Isofenphos-methyl Na.2 | 9.9  | 354.0 | 311.8 | 156   | 10 | 21 | 22 |  |
| Isofenphos-methyl.1    | 9.9  | 332.1 | 231.0 | 61    | 10 | 20 | 12 |  |
| Isofenphos-methyl.2    | 9.9  | 332.1 | 273.0 | 61    | 10 | 17 | 12 |  |
| Isofenphos-methyl.3    | 9.9  | 332.0 | 231.0 | 1     | 10 | 19 | 22 |  |
| Isofenphos-methyl.4    | 9.9  | 332.0 | 272.9 | 1     | 10 | 7  | 22 |  |
| Isoprocarb.1           | 7.5  | 194.1 | 137.0 | 56    | 10 | 13 | 8  |  |
| Isoprocarb.2           | 7.5  | 194.1 | 95.0  | 56    | 10 | 21 | 6  |  |
| Isoprothiolane.1       | 8.7  | 291.1 | 189.0 | 76.02 | 10 | 36 | 12 |  |
| Isoprothiolane.2       | 8.7  | 291.1 | 145.0 | 76.01 | 10 | 50 | 12 |  |
| Isoproturon.1          | 7.6  | 207.2 | 72.1  | 71    | 10 | 29 | 12 |  |
| Isoproturon.2          | 7.6  | 207.2 | 46.1  | 71    | 10 | 35 | 8  |  |
| Isoxaflutole.1         | 7.6  | 359.9 | 250.9 | 136   | 10 | 23 | 28 |  |
| Isoxaflutole.2         | 7.6  | 359.9 | 220.0 | 136   | 10 | 51 | 22 |  |
| Isoxathion.1           | 10.5 | 314.1 | 105.0 | 61    | 10 | 32 | 12 |  |
| Isoxathion.2           | 10.5 | 314.1 | 96.9  | 61    | 10 | 50 | 12 |  |
| Ivermectin.1           | 14.3 | 892.3 | 569.5 | 56    | 10 | 21 | 16 |  |
| Ivermectin.2           | 14.3 | 892.3 | 307.3 | 56    | 10 | 33 | 8  |  |
| izoxaben.1             | 8.6  | 333.1 | 150.1 | 65    | 10 | 50 | 12 |  |
| izoxaben.2             | 8.6  | 333.1 | 165.0 | 65    | 10 | 35 | 12 |  |
| Kresoxim-methyl.1      | 10.0 | 314.2 | 116.1 | 63    | 10 | 18 | 6  |  |



|                    |      |       |       |     |    |    |    |                |
|--------------------|------|-------|-------|-----|----|----|----|----------------|
| Kresoxim-methyl.2  | 10.0 | 314.2 | 131.2 | 63  | 10 | 29 | 8  |                |
| Lenacil.1          | 7.5  | 235.1 | 153.0 | 41  | 10 | 21 | 18 |                |
| Lenacil.2          | 7.5  | 235.1 | 136.0 | 41  | 10 | 43 | 16 |                |
| Linuron.1          | 8.3  | 249.1 | 182.1 | 66  | 10 | 21 | 12 |                |
| Linuron.2          | 8.3  | 249.1 | 160.0 | 66  | 10 | 25 | 34 |                |
| Lufenuron.1        | 11.9 | 511.1 | 158.1 | 96  | 10 | 27 | 10 |                |
| Lufenuron.2        | 11.9 | 511.1 | 141.2 | 96  | 10 | 61 | 8  |                |
| Malaoxon.1         | 6.8  | 315.1 | 99.1  | 61  | 10 | 37 | 6  |                |
| Malaoxon.2         | 6.8  | 315.1 | 127.1 | 61  | 10 | 19 | 8  |                |
| Malathion.1        | 8.7  | 331.0 | 285.0 | 61  | 10 | 11 | 12 | Malathion-d6.1 |
| Malathion.2        | 8.7  | 331.0 | 127.0 | 61  | 10 | 19 | 12 | Malathion-d6.1 |
| Mandipropamid.1    | 8.5  | 412.1 | 328.1 | 85  | 10 | 19 | 8  |                |
| Mandipropamid.2    | 8.5  | 412.1 | 356.1 | 85  | 10 | 15 | 10 |                |
| Mecarbam.1         | 9.3  | 330.1 | 227.0 | 61  | 10 | 20 | 12 |                |
| Mecarbam.2         | 9.3  | 330.1 | 198.9 | 61  | 10 | 26 | 12 |                |
| Mefenacet.1        | 8.9  | 299.0 | 148.1 | 36  | 10 | 21 | 8  |                |
| Mefenacet.2        | 8.9  | 299.0 | 120.1 | 36  | 10 | 35 | 6  |                |
| Mefenpyr-diethyl.1 | 10.4 | 390.1 | 327.0 | 61  | 10 | 26 | 12 |                |
| Mefenpyr-diethyl.2 | 10.4 | 390.1 | 160.1 | 61  | 10 | 46 | 12 |                |
| Mepanipyrim.1      | 9.2  | 224.0 | 106.0 | 86  | 10 | 35 | 6  |                |
| Mepanipyrim.2      | 9.2  | 224.0 | 77.0  | 86  | 10 | 55 | 6  |                |
| Mephosfolan.1      | 6.6  | 270.1 | 140.0 | 65  | 10 | 34 | 12 |                |
| Mephosfolan.2      | 6.6  | 270.1 | 75.1  | 65  | 10 | 48 | 12 |                |
| Mepronil.1         | 8.8  | 270.1 | 119.1 | 81  | 10 | 31 | 6  |                |
| Mepronil.2         | 8.8  | 270.1 | 228.0 | 81  | 10 | 21 | 16 |                |
| Mesotrione.1       | 3.1  | 340.2 | 228.2 | 85  | 10 | 22 | 5  |                |
| Mesotrione.2       | 3.1  | 340.2 | 104.1 | 85  | 10 | 41 | 6  |                |
| Metaflumizone.1    | 11.7 | 507.1 | 178.1 | 101 | 10 | 33 | 10 |                |

|                      |      |       |       |     |    |    |    |                    |
|----------------------|------|-------|-------|-----|----|----|----|--------------------|
| Metaflumizone.2      | 11.7 | 507.1 | 287.1 | 101 | 10 | 33 | 6  |                    |
| Metalaxyl.1          | 7.6  | 280.1 | 220.2 | 61  | 10 | 19 | 14 |                    |
| Metalaxyl.2          | 7.6  | 280.1 | 192.2 | 61  | 10 | 25 | 12 |                    |
| Metamitron.1         | 5.2  | 203.1 | 175.1 | 86  | 10 | 21 | 20 |                    |
| Metamitron.2         | 5.2  | 203.1 | 104.0 | 86  | 10 | 29 | 12 |                    |
| Metazachlor.1        | 7.5  | 278.0 | 134.1 | 80  | 10 | 27 | 16 |                    |
| Metazachlor.2        | 7.5  | 278.0 | 210.0 | 80  | 10 | 13 | 24 |                    |
| Metconazole.1        | 10.5 | 320.1 | 70.0  | 101 | 10 | 43 | 4  |                    |
| Metconazole.2        | 10.5 | 320.1 | 125.0 | 101 | 10 | 53 | 4  |                    |
| Methabenzthiazuron.1 | 7.5  | 222.1 | 150.3 | 46  | 10 | 45 | 8  |                    |
| Methabenzthiazuron.2 | 7.5  | 222.1 | 165.2 | 46  | 10 | 21 | 10 |                    |
| Methacrifos.1        | 7.4  | 241.0 | 124.9 | 61  | 10 | 35 | 12 |                    |
| Methacrifos.2        | 7.4  | 241.0 | 208.9 | 61  | 10 | 17 | 12 |                    |
| Methamidophos.1      | 1.9  | 141.9 | 93.9  | 51  | 10 | 25 | 6  | Methamidophos-d6.1 |
| Methamidophos.2      | 1.9  | 142.0 | 125.0 | 51  | 10 | 19 | 6  | Methamidophos-d6.1 |
| Methidathion.1       | 7.9  | 303.0 | 145.1 | 66  | 10 | 15 | 12 |                    |
| Methidathion.2       | 7.9  | 303.0 | 85.1  | 66  | 10 | 27 | 12 |                    |
| Methiocarb.1         | 8.4  | 226.1 | 169.1 | 56  | 10 | 13 | 10 |                    |
| Methiocarb.2         | 8.4  | 226.1 | 121.1 | 56  | 10 | 27 | 6  |                    |
| Methiocarb-sulfone.1 | 5.2  | 258.1 | 200.9 | 61  | 10 | 13 | 12 |                    |
| Methiocarb-sulfone.2 | 5.2  | 258.1 | 122.0 | 61  | 10 | 25 | 8  |                    |
| Methomyl.1           | 4.0  | 163.1 | 88.1  | 41  | 10 | 13 | 4  |                    |
| Methomyl.2           | 4.0  | 163.1 | 106.0 | 41  | 10 | 13 | 6  |                    |
| Methoprottryne.1     | 8.3  | 272.2 | 240.2 | 41  | 10 | 27 | 16 |                    |
| Methoprottryne.2     | 8.3  | 272.2 | 198.0 | 41  | 10 | 31 | 12 |                    |
| Methoxyfenozide.1    | 8.8  | 369.1 | 313.2 | 56  | 10 | 11 | 4  |                    |
| Methoxyfenozide.2    | 8.8  | 369.1 | 149.1 | 56  | 10 | 21 | 8  |                    |
| Metobromuron.1       | 7.4  | 259.0 | 170.2 | 60  | 10 | 25 | 10 |                    |

|                        |      |       |       |    |    |    |    |                  |
|------------------------|------|-------|-------|----|----|----|----|------------------|
| Metobromuron.2         | 7.4  | 259.0 | 148.2 | 60 | 10 | 21 | 8  |                  |
| Metolachlor.1          | 9.5  | 284.1 | 252.0 | 65 | 10 | 20 | 12 | Metolachlor-d6.1 |
| Metolachlor.2          | 9.5  | 284.1 | 176.2 | 65 | 10 | 35 | 12 | Metolachlor-d6.1 |
| Metolcarb.1            | 6.4  | 166.0 | 108.9 | 76 | 10 | 13 | 10 |                  |
| Metolcarb.2            | 6.4  | 166.0 | 94.0  | 76 | 10 | 39 | 10 |                  |
| Metosulam.1            | 6.3  | 418.0 | 175.1 | 61 | 10 | 41 | 12 |                  |
| Metosulam.2            | 6.3  | 418.0 | 140.1 | 61 | 10 | 55 | 12 |                  |
| Metoxuron.1            | 6.1  | 229.0 | 72.0  | 70 | 10 | 19 | 8  |                  |
| Metoxuron.2            | 6.1  | 229.0 | 156.0 | 70 | 10 | 31 | 16 |                  |
| Metrafenon.1           | 10.7 | 409.2 | 209.1 | 51 | 10 | 19 | 12 |                  |
| Metrafenon.2           | 10.7 | 411.2 | 209.1 | 51 | 10 | 19 | 12 |                  |
| Metribuzin.1           | 6.8  | 215.1 | 187.1 | 41 | 10 | 25 | 12 |                  |
| Metribuzin.2           | 6.8  | 215.1 | 84.1  | 41 | 10 | 31 | 6  |                  |
| Metsulfuron-methyl.1   | 4.7  | 382.1 | 167.1 | 65 | 10 | 35 | 12 |                  |
| Metsulfuron-methyl.2   | 4.7  | 382.1 | 135.1 | 65 | 10 | 55 | 12 |                  |
| Mevinphos-Isomer.1.1   | 5.3  | 225.1 | 127.1 | 56 | 10 | 21 | 8  |                  |
| Mevinphos-Isomer.1.2   | 5.3  | 225.1 | 193.2 | 56 | 10 | 11 | 12 |                  |
| Mevinphos-Isomer.2.1   | 5.9  | 225.1 | 127.1 | 56 | 10 | 21 | 8  |                  |
| Mevinphos-Isomer.2.2   | 5.9  | 225.1 | 193.2 | 56 | 10 | 11 | 12 |                  |
| Mexacarbate.1          | 8.8  | 223.2 | 166.1 | 56 | 10 | 21 | 10 |                  |
| Mexacarbate.2          | 8.8  | 223.2 | 151.0 | 56 | 10 | 31 | 10 |                  |
| Molinate.1             | 9.0  | 188.2 | 126.2 | 65 | 10 | 25 | 10 |                  |
| Molinate.2             | 9.0  | 188.2 | 98.0  | 65 | 10 | 45 | 10 |                  |
| (Monceren)Pencycuron.1 | 10.7 | 329.1 | 125.0 | 71 | 10 | 31 | 8  |                  |
| (Monceren)Pencycuron.2 | 10.7 | 329.1 | 218.1 | 71 | 10 | 23 | 14 |                  |
| Monocrotophos.1        | 4.5  | 224.1 | 127.1 | 61 | 10 | 21 | 8  |                  |
| Monocrotophos.2        | 4.5  | 224.1 | 98.0  | 61 | 10 | 17 | 6  |                  |
| Monolinuron.1          | 7.1  | 215.1 | 126.1 | 61 | 10 | 23 | 8  |                  |

|                |      |       |       |     |    |    |    |                   |
|----------------|------|-------|-------|-----|----|----|----|-------------------|
| Monolinuron.2  | 7.1  | 215.1 | 99.0  | 61  | 10 | 47 | 8  |                   |
| Monuron.1      | 6.6  | 199.0 | 126.0 | 71  | 10 | 42 | 12 |                   |
| Monuron.2      | 6.6  | 199.0 | 99.0  | 71  | 10 | 50 | 12 |                   |
| Moxidectin.1   | 14.0 | 640.4 | 528.5 | 61  | 10 | 13 | 18 |                   |
| Moxidectin.2   | 14.0 | 640.4 | 498.5 | 61  | 10 | 17 | 16 |                   |
| Myclobutanil.1 | 8.8  | 289.0 | 70.0  | 66  | 10 | 41 | 4  |                   |
| Myclobutanil.2 | 8.8  | 289.0 | 125.0 | 66  | 10 | 39 | 8  |                   |
| Napropamide.1  | 9.4  | 272.2 | 171.0 | 56  | 10 | 35 | 12 | Napropamide-d10.1 |
| Napropamide.2  | 9.4  | 272.2 | 128.0 | 56  | 10 | 53 | 12 | Napropamide-d10.1 |
| Neburon.1      | 9.8  | 275.0 | 88.0  | 26  | 10 | 23 | 6  |                   |
| Neburon.2      | 9.8  | 275.0 | 114.0 | 26  | 10 | 21 | 6  |                   |
| Nitenpyram.1   | 3.8  | 271.0 | 126.0 | 66  | 10 | 35 | 8  |                   |
| Nitenpyram.2   | 3.8  | 271.0 | 225.2 | 66  | 10 | 17 | 14 |                   |
| Nitralin.1     | 9.6  | 346.1 | 304.1 | 56  | 10 | 20 | 12 |                   |
| Nitralin.2     | 9.6  | 346.1 | 262.1 | 56  | 10 | 16 | 12 |                   |
| Norflurazon.1  | 7.7  | 304.0 | 284.1 | 65  | 10 | 39 | 10 |                   |
| Norflurazon.2  | 7.7  | 304.0 | 160.1 | 65  | 10 | 50 | 10 |                   |
| Novaluron.1    | 11.1 | 493.0 | 158.1 | 66  | 10 | 29 | 10 |                   |
| Novaluron.2    | 11.1 | 493.0 | 141.1 | 66  | 10 | 65 | 8  |                   |
| Nuarimol.1     | 8.3  | 315.0 | 252.1 | 101 | 10 | 37 | 22 |                   |
| Nuarimol.2     | 8.3  | 315.0 | 81.0  | 101 | 10 | 49 | 6  |                   |
| Omethoate.1    | 3.0  | 214.0 | 182.8 | 56  | 10 | 17 | 12 |                   |
| Omethoate.2    | 3.0  | 214.0 | 124.9 | 56  | 10 | 31 | 8  |                   |
| Oxadiazon.1    | 11.9 | 345.0 | 303.0 | 146 | 10 | 19 | 16 |                   |
| Oxadiazon.2    | 11.9 | 345.0 | 219.9 | 146 | 10 | 27 | 12 |                   |
| Oxadixyl.1     | 6.3  | 279.1 | 132.1 | 66  | 10 | 43 | 8  |                   |
| Oxadixyl.2     | 6.3  | 279.1 | 219.1 | 66  | 10 | 15 | 14 |                   |
| Oxamyl.1       | 3.8  | 237.1 | 90.1  | 26  | 10 | 11 | 6  |                   |

|                     |      |       |       |     |    |    |    |                    |
|---------------------|------|-------|-------|-----|----|----|----|--------------------|
| Oxamyl.2            | 3.8  | 237.1 | 72.1  | 26  | 10 | 29 | 4  |                    |
| Oxamyl-oxime.1      | 3.0  | 163.0 | 71.9  | 65  | 10 | 52 | 10 |                    |
| Oxamyl-oxime.2      | 3.0  | 163.0 | 90.0  | 65  | 10 | 35 | 10 |                    |
| Oxycarboxin.1       | 5.7  | 268.1 | 174.9 | 65  | 10 | 52 | 10 |                    |
| Oxycarboxin.2       | 5.7  | 268.1 | 104.9 | 65  | 10 | 49 | 10 |                    |
| Oxydemeton-methyl.1 | 4.1  | 247.0 | 168.9 | 51  | 10 | 21 | 14 |                    |
| Oxydemeton-methyl.2 | 4.1  | 247.0 | 108.9 | 51  | 10 | 39 | 18 |                    |
| Paclobutrazol.1     | 8.7  | 294.0 | 70.0  | 21  | 10 | 49 | 12 |                    |
| Paclobutrazol.2     | 8.7  | 294.0 | 125.0 | 21  | 10 | 41 | 12 |                    |
| Paraoxon.1          | 7.4  | 275.9 | 219.9 | 65  | 10 | 20 | 12 |                    |
| Paraoxon.2          | 7.4  | 275.9 | 174.1 | 65  | 10 | 35 | 12 |                    |
| Paraoxon-ethyl.1    | 7.4  | 276.0 | 219.9 | 46  | 10 | 21 | 26 |                    |
| Paraoxon-ethyl.2    | 7.4  | 276.0 | 174.0 | 46  | 10 | 33 | 20 |                    |
| Paraoxon-methyl.1   | 6.3  | 248.0 | 202.0 | 76  | 10 | 27 | 12 |                    |
| Paraoxon-methyl.2   | 6.3  | 248.1 | 109.0 | 76  | 10 | 39 | 18 |                    |
| Parathion.1         | 9.9  | 292.0 | 235.9 | 66  | 10 | 21 | 14 |                    |
| Parathion.2         | 9.9  | 292.0 | 110.0 | 66  | 10 | 41 | 14 |                    |
| Parathion-methyl.1  | 8.3  | 263.9 | 232.1 | 71  | 10 | 21 | 12 |                    |
| Parathion-methyl.2  | 8.3  | 263.9 | 125.0 | 71  | 10 | 38 | 12 |                    |
| Penconazole.1       | 9.9  | 284.1 | 70.0  | 81  | 10 | 37 | 2  |                    |
| Penconazole.2       | 9.9  | 284.1 | 159.0 | 81  | 10 | 35 | 16 |                    |
| Pendimethalin.1     | 12.3 | 282.1 | 212.2 | 46  | 10 | 15 | 12 | Pendimethalin-d5.1 |
| Pendimethalin.2     | 12.3 | 282.1 | 194.0 | 46  | 10 | 23 | 12 | Pendimethalin-d5.1 |
| Penthiopyrad.1      | 9.9  | 360.0 | 275.9 | 136 | 10 | 19 | 18 |                    |
| Penthiopyrad.2      | 9.9  | 360.0 | 177.0 | 136 | 10 | 41 | 20 |                    |
| Pethoxamid.1        | 9.4  | 296.2 | 131.0 | 65  | 10 | 35 | 12 |                    |
| Pethoxamid.2        | 9.4  | 296.2 | 91.0  | 65  | 10 | 50 | 12 |                    |
| Phenmedipham.1      | 7.9  | 301.2 | 168.0 | 76  | 10 | 12 | 10 |                    |

|                      |      |       |       |     |    |    |    |  |
|----------------------|------|-------|-------|-----|----|----|----|--|
| Phenmedipham.2       | 7.9  | 301.2 | 107.9 | 76  | 10 | 44 | 6  |  |
| Phenothrin.1         | 13.8 | 351.1 | 183.0 | 71  | 10 | 31 | 12 |  |
| Phenothrin.2         | 13.8 | 351.1 | 128.0 | 71  | 10 | 83 | 12 |  |
| Phenthoate.1         | 9.9  | 321.0 | 247.0 | 65  | 10 | 18 | 12 |  |
| Phenthoate.2         | 9.9  | 321.0 | 135.1 | 65  | 10 | 35 | 12 |  |
| Phenylthiourea.1     | 3.9  | 153.0 | 135.9 | 1   | 10 | 21 | 12 |  |
| Phenylthiourea.2     | 3.9  | 153.0 | 77.2  | 1   | 10 | 33 | 4  |  |
| Phorate-sulfone.1    | 7.4  | 293.0 | 170.8 | 65  | 10 | 20 | 12 |  |
| Phorate-sulfone.2    | 7.4  | 293.0 | 96.7  | 65  | 10 | 48 | 12 |  |
| Phorate-sulfoxide.1  | 7.3  | 277.0 | 143.0 | 65  | 10 | 35 | 12 |  |
| Phorate-sulfoxide.2  | 7.3  | 277.0 | 171.0 | 65  | 10 | 25 | 12 |  |
| Phosalone.1          | 10.6 | 368.0 | 182.0 | 65  | 10 | 24 | 12 |  |
| Phosalone.2          | 10.6 | 369.9 | 111.0 | 65  | 10 | 50 | 12 |  |
| Phosmet.1            | 7.7  | 318.0 | 160.1 | 71  | 10 | 19 | 12 |  |
| Phosmet.2            | 7.7  | 318.0 | 133.1 | 71  | 10 | 49 | 12 |  |
| Phosphamidon.1       | 6.5  | 300.2 | 127.1 | 65  | 10 | 42 | 12 |  |
| Phosphamidon.2       | 6.5  | 300.2 | 174.0 | 65  | 10 | 35 | 12 |  |
| Phoxim.1             | 10.5 | 299.2 | 129.2 | 56  | 10 | 17 | 8  |  |
| Phoxim.2             | 10.5 | 299.2 | 77.1  | 56  | 10 | 42 | 12 |  |
| Picoxystrobin.1      | 9.7  | 368.0 | 205.0 | 56  | 10 | 13 | 14 |  |
| Picoxystrobin.2      | 9.7  | 368.0 | 145.0 | 56  | 10 | 29 | 8  |  |
| Pinoxaden.1          | 10.5 | 401.1 | 317.1 | 141 | 10 | 27 | 34 |  |
| Pinoxaden.2          | 10.5 | 401.1 | 57.0  | 141 | 10 | 65 | 26 |  |
| Piperonyl-butoxide.1 | 11.9 | 356.2 | 177.2 | 41  | 10 | 13 | 10 |  |
| Piperonyl-butoxide.2 | 11.9 | 356.2 | 119.1 | 41  | 10 | 47 | 6  |  |
| Piperophos.1         | 11.0 | 354.1 | 171.0 | 65  | 10 | 26 | 12 |  |
| Piperophos.2         | 11.0 | 354.1 | 143.0 | 65  | 10 | 35 | 12 |  |
| Pirimicarb.1         | 7.4  | 239.2 | 72.1  | 61  | 10 | 33 | 4  |  |

|                                 |      |       |       |     |    |    |    |  |
|---------------------------------|------|-------|-------|-----|----|----|----|--|
| Pirimicarb.2                    | 7.4  | 239.2 | 182.1 | 61  | 10 | 21 | 12 |  |
| Pirimicarb-desmethyl.1          | 6.2  | 225.0 | 72.0  | 56  | 10 | 27 | 12 |  |
| Pirimicarb-desmethyl.2          | 6.2  | 225.0 | 168.1 | 56  | 10 | 19 | 12 |  |
| Pirimiphos-ethyl.1              | 11.9 | 334.1 | 198.0 | 65  | 10 | 38 | 12 |  |
| Pirimiphos-ethyl.2              | 11.9 | 334.1 | 182.3 | 65  | 10 | 42 | 12 |  |
| Pirimiphos-methyl.1             | 10.7 | 306.1 | 164.1 | 66  | 10 | 29 | 12 |  |
| Pirimiphos-methyl.2             | 10.7 | 306.1 | 108.1 | 66  | 10 | 39 | 12 |  |
| Pirimisulfuron-metil.1          | 7.1  | 469.0 | 254.0 | 65  | 10 | 29 | 12 |  |
| Pirimisulfuron-metil.2          | 7.1  | 469.0 | 135.1 | 65  | 10 | 50 | 12 |  |
| Prochloraz.1                    | 10.5 | 376.0 | 308.0 | 51  | 10 | 15 | 8  |  |
| Prochloraz.2                    | 10.5 | 376.0 | 70.0  | 51  | 10 | 43 | 4  |  |
| Prochloraz-desimidazole-amino.1 | 10.4 | 325.0 | 129.0 | 136 | 10 | 33 | 26 |  |
| Prochloraz-desimidazole-amino.2 | 10.4 | 325.0 | 282.0 | 136 | 10 | 25 | 14 |  |
| Profluralin.1                   | 7.4  | 348.0 | 276.0 | 1   | 10 | 13 | 14 |  |
| Profluralin.2                   | 7.4  | 348.0 | 248.0 | 1   | 10 | 19 | 14 |  |
| Promecarb.1                     | 8.6  | 208.1 | 151.0 | 56  | 10 | 13 | 10 |  |
| Promecarb.2                     | 8.6  | 208.1 | 109.0 | 56  | 10 | 21 | 6  |  |
| Prometon.1                      | 8.2  | 226.1 | 142.0 | 81  | 10 | 33 | 8  |  |
| Prometon.2                      | 8.2  | 226.1 | 86.0  | 81  | 10 | 39 | 6  |  |
| Prometryne.1                    | 9.2  | 242.2 | 158.1 | 41  | 10 | 33 | 10 |  |
| Prometryne.2                    | 9.2  | 242.2 | 200.1 | 41  | 10 | 25 | 12 |  |
| Propachlor.1                    | 7.6  | 212.0 | 170.0 | 65  | 10 | 25 | 12 |  |
| Propachlor.2                    | 7.6  | 212.0 | 94.1  | 65  | 10 | 47 | 12 |  |
| Propamocarb.1                   | 4.0  | 189.2 | 102.0 | 61  | 10 | 25 | 6  |  |
| Propamocarb.2                   | 4.0  | 189.2 | 144.0 | 61  | 10 | 19 | 8  |  |
| Propanil.1                      | 8.3  | 218.0 | 127.0 | 71  | 10 | 50 | 12 |  |
| Propanil.2                      | 8.3  | 218.0 | 162.0 | 71  | 10 | 35 | 12 |  |
| Propargite.1                    | 12.5 | 368.2 | 231.1 | 41  | 10 | 15 | 16 |  |

|                    |      |       |       |     |    |    |    |                     |
|--------------------|------|-------|-------|-----|----|----|----|---------------------|
| Propargite.2       | 12.5 | 368.2 | 175.1 | 41  | 10 | 23 | 10 |                     |
| Propetamphos.1     | 8.9  | 282.1 | 138.0 | 65  | 10 | 30 | 12 |                     |
| Propetamphos.2     | 8.9  | 282.1 | 110.0 | 65  | 10 | 45 | 12 |                     |
| Propham.1          | 7.4  | 180.1 | 138.0 | 46  | 10 | 11 | 8  |                     |
| Propham.2          | 7.4  | 180.1 | 120.0 | 46  | 10 | 23 | 6  |                     |
| Propiconazole.1    | 10.2 | 342.1 | 159.0 | 81  | 10 | 31 | 8  |                     |
| Propiconazole.2    | 10.2 | 342.1 | 69.0  | 81  | 10 | 39 | 6  |                     |
| Propoxur.1         | 6.7  | 210.1 | 111.0 | 51  | 10 | 19 | 6  |                     |
| Propoxur.2         | 6.7  | 210.1 | 168.1 | 51  | 10 | 11 | 10 |                     |
| Propyzamide.1      | 8.8  | 256.1 | 190.0 | 65  | 10 | 28 | 12 |                     |
| Propyzamide.2      | 8.8  | 256.1 | 173.0 | 65  | 10 | 32 | 12 |                     |
| Proquinazid.1      | 12.9 | 373.2 | 330.9 | 60  | 10 | 16 | 12 |                     |
| Proquinazid.2      | 12.9 | 373.2 | 289.0 | 60  | 10 | 20 | 12 |                     |
| Prosulfocarb.1     | 11.3 | 252.1 | 91.2  | 76  | 10 | 29 | 12 |                     |
| Prosulfocarb.2     | 11.3 | 252.1 | 128.1 | 76  | 10 | 17 | 12 |                     |
| Prosulfuron.1      | 6.7  | 420.1 | 167.1 | 65  | 10 | 32 | 12 |                     |
| Prosulfuron.2      | 6.7  | 420.1 | 141.0 | 65  | 10 | 41 | 12 |                     |
| Prothioconazole.1  | 9.7  | 344.1 | 188.9 | 46  | 10 | 31 | 12 |                     |
| Prothioconazole.2  | 9.7  | 344.1 | 125.1 | 46  | 10 | 33 | 13 |                     |
| Prothiofos.1       | 13.2 | 344.9 | 240.9 | 126 | 10 | 25 | 28 |                     |
| Prothiofos.2       | 13.2 | 344.9 | 132.9 | 126 | 10 | 65 | 16 |                     |
| Pymetrozine.1      | 4.3  | 218.0 | 105.0 | 71  | 10 | 27 | 6  |                     |
| Pymetrozine.2      | 4.3  | 218.0 | 78.0  | 71  | 10 | 61 | 4  |                     |
| Pyracarbolid.1     | 6.9  | 218.1 | 125.0 | 61  | 10 | 25 | 8  |                     |
| Pyracarbolid.2     | 6.9  | 218.1 | 97.0  | 61  | 10 | 37 | 8  |                     |
| Pyraclostrobin.1   | 10.4 | 388.0 | 194.0 | 51  | 10 | 17 | 14 | Pyraclostrobin-d3.1 |
| Pyraclostrobin.2   | 10.4 | 388.0 | 163.0 | 51  | 10 | 31 | 10 | Pyraclostrobin-d3.1 |
| Pyraflufen-ethyl.1 | 10.1 | 414.9 | 340.9 | 116 | 10 | 27 | 18 |                     |



|                    |      |       |       |     |    |    |    |                   |
|--------------------|------|-------|-------|-----|----|----|----|-------------------|
| Pyraflufen-ethyl.2 | 10.1 | 414.9 | 262.9 | 116 | 10 | 43 | 30 |                   |
| Pyrazophos.1       | 10.6 | 374.0 | 222.0 | 60  | 10 | 32 | 12 |                   |
| Pyrazophos.2       | 10.6 | 374.0 | 194.0 | 60  | 10 | 45 | 12 |                   |
| Pyrethrin.1        | 12.6 | 329.1 | 161.1 | 136 | 10 | 13 | 8  |                   |
| Pyrethrin.2        | 12.6 | 329.1 | 77.0  | 136 | 10 | 81 | 8  |                   |
| Pyridaben.1        | 13.1 | 365.0 | 147.0 | 41  | 10 | 33 | 8  |                   |
| Pyridaben.2        | 13.1 | 365.0 | 309.0 | 41  | 10 | 19 | 8  |                   |
| Pyridafol.1        | 4.3  | 207.0 | 103.9 | 65  | 10 | 39 | 12 |                   |
| Pyridafol.2        | 4.3  | 207.0 | 77.0  | 65  | 10 | 45 | 12 |                   |
| Pyridaphenthion.1  | 8.9  | 341.0 | 189.0 | 56  | 10 | 36 | 12 |                   |
| Pyridaphenthion.2  | 8.9  | 341.0 | 205.0 | 56  | 10 | 32 | 12 |                   |
| Pyrifenox.1        | 9.6  | 295.1 | 93.1  | 76  | 10 | 42 | 12 |                   |
| Pyrifenox.2        | 9.6  | 295.1 | 67.2  | 76  | 10 | 80 | 12 |                   |
| Pyrimethanil.1     | 8.5  | 200.0 | 107.0 | 86  | 10 | 33 | 6  | Pyrimethanil-d5.1 |
| Pyrimethanil.2     | 8.5  | 200.0 | 82.0  | 86  | 10 | 37 | 4  | Pyrimethanil-d5.1 |
| Pyriproxyfen.1     | 12.1 | 322.0 | 96.0  | 46  | 10 | 21 | 6  |                   |
| Pyriproxyfen.2     | 12.1 | 322.0 | 185.0 | 46  | 10 | 31 | 12 |                   |
| Pyroquilon.1       | 6.6  | 174.0 | 117.0 | 65  | 10 | 32 | 12 |                   |
| Pyroquilon.2       | 6.6  | 174.0 | 132.0 | 65  | 10 | 25 | 12 |                   |
| Quinalphos.1       | 9.9  | 299.0 | 163.0 | 65  | 10 | 32 | 12 |                   |
| Quinalphos.2       | 9.9  | 299.0 | 271.0 | 65  | 10 | 20 | 12 |                   |
| Quinoclamine.1     | 6.5  | 208.0 | 77.0  | 65  | 10 | 55 | 12 |                   |
| Quinoclamine.2     | 6.5  | 208.0 | 105.0 | 65  | 10 | 41 | 12 |                   |
| Quinoxifen.1       | 12.1 | 308.1 | 197.1 | 91  | 10 | 45 | 12 |                   |
| Quinoxifen.2       | 12.1 | 308.1 | 162.1 | 91  | 10 | 63 | 10 |                   |
| Quizalofop.1       | 7.8  | 345.1 | 299.0 | 71  | 10 | 25 | 15 |                   |
| Quizalofop.2       | 7.8  | 347.1 | 91.0  | 71  | 10 | 47 | 15 |                   |
| Resmethrin.1       | 13.5 | 339.1 | 128.0 | 116 | 10 | 61 | 14 |                   |

|                         |      |       |       |     |    |    |    |  |
|-------------------------|------|-------|-------|-----|----|----|----|--|
| Resmethrin.2            | 13.5 | 339.1 | 91.0  | 116 | 10 | 67 | 14 |  |
| Rimsulfuron.1           | 4.8  | 432.0 | 182.1 | 131 | 10 | 27 | 10 |  |
| Rimsulfuron.2           | 4.8  | 432.0 | 325.0 | 131 | 10 | 21 | 22 |  |
| Rotenone.1              | 9.6  | 395.1 | 213.1 | 101 | 10 | 31 | 14 |  |
| Rotenone.2              | 9.6  | 395.1 | 192.1 | 101 | 10 | 33 | 12 |  |
| Sebuthylazin.1          | 8.2  | 230.1 | 174.2 | 65  | 10 | 35 | 12 |  |
| Sebuthylazin.2          | 8.2  | 230.1 | 68.0  | 65  | 10 | 55 | 12 |  |
| Secbumeton.1            | 8.4  | 226.2 | 170.1 | 86  | 10 | 25 | 10 |  |
| Secbumeton.2            | 8.4  | 226.2 | 100.0 | 86  | 10 | 37 | 6  |  |
| Silthiofam.1            | 9.8  | 268.0 | 139.1 | 65  | 10 | 31 | 12 |  |
| Silthiofam.2            | 9.8  | 268.0 | 73.0  | 65  | 10 | 50 | 12 |  |
| Simazine.1              | 6.7  | 202.2 | 104.0 | 91  | 10 | 33 | 12 |  |
| Simazine.2              | 6.7  | 202.2 | 124.0 | 91  | 10 | 30 | 12 |  |
| Simetryn.1              | 7.5  | 214.0 | 124.0 | 36  | 10 | 29 | 10 |  |
| Simetryn.2              | 7.5  | 214.0 | 144.0 | 36  | 10 | 29 | 8  |  |
| Spinetoram.1            | 13.7 | 748.5 | 142.2 | 146 | 10 | 43 | 8  |  |
| Spinetoram.2            | 13.7 | 748.5 | 98.1  | 146 | 10 | 95 | 8  |  |
| Spinosad (Spinosyn A).1 | 13.3 | 732.5 | 142.2 | 136 | 10 | 39 | 14 |  |
| Spinosad (Spinosyn A).2 | 13.3 | 732.5 | 98.1  | 136 | 10 | 95 | 6  |  |
| Spinosad (Spinosyn D).1 | 13.7 | 746.8 | 142.4 | 112 | 11 | 41 | 11 |  |
| Spinosad (Spinosyn D).2 | 13.7 | 746.8 | 98.3  | 112 | 11 | 93 | 7  |  |
| Spirodiclofen.1         | 13.0 | 411.3 | 71.3  | 101 | 10 | 31 | 14 |  |
| Spirodiclofen.2         | 13.0 | 411.3 | 313.3 | 101 | 10 | 17 | 6  |  |
| Spiromesifen.1          | 12.2 | 371.2 | 273.2 | 76  | 10 | 20 | 8  |  |
| Spiromesifen.2          | 12.2 | 371.2 | 255.2 | 76  | 10 | 39 | 6  |  |
| Spirotetramat.1         | 9.2  | 374.2 | 330.2 | 136 | 10 | 23 | 8  |  |
| Spirotetramat.2         | 9.2  | 374.2 | 302.2 | 136 | 10 | 27 | 20 |  |
| Spirotetramat-cisenol.1 | 7.8  | 300.0 | 268.0 | 276 | 10 | 39 | 30 |  |

|                                           |      |       |       |     |    |    |    |  |
|-------------------------------------------|------|-------|-------|-----|----|----|----|--|
| Spirotetramat-cisenol.2                   | 7.8  | 300.0 | 214.0 | 276 | 10 | 37 | 24 |  |
| Spiroxamine-Isomer.1.1                    | 11.0 | 298.2 | 144.2 | 71  | 10 | 29 | 8  |  |
| Spiroxamine-Isomer.1.2                    | 11.0 | 298.2 | 100.1 | 71  | 10 | 43 | 6  |  |
| Sulfentrazone.1                           | 6.7  | 387.0 | 307.1 | 96  | 10 | 29 | 20 |  |
| Sulfentrazone.2                           | 6.7  | 387.0 | 146.0 | 96  | 10 | 59 | 8  |  |
| Sulfometuron-methyl.1                     | 5.3  | 365.0 | 150.0 | 65  | 10 | 26 | 12 |  |
| Sulfometuron-methyl.2                     | 5.3  | 365.0 | 107.0 | 65  | 10 | 49 | 12 |  |
| Sulfosulfuron.1                           | 5.4  | 471.1 | 211.2 | 65  | 10 | 38 | 12 |  |
| Sulfosulfuron.2                           | 5.4  | 471.1 | 156.0 | 65  | 10 | 50 | 12 |  |
| Sulfotep(Tetraethyldithiopyrophosphate).1 | 8.2  | 323.0 | 97.0  | 65  | 10 | 48 | 12 |  |
| Sulfotep(Tetraethyldithiopyrophosphate).2 | 8.2  | 323.0 | 115.0 | 65  | 10 | 31 | 12 |  |
| Tau-fluvalinate.1                         | 13.4 | 503.0 | 181.0 | 65  | 10 | 39 | 12 |  |
| Tau-fluvalinate.2                         | 13.4 | 503.0 | 208.0 | 65  | 10 | 32 | 12 |  |
| Tebuconazole.1                            | 10.0 | 308.2 | 70.0  | 86  | 10 | 51 | 10 |  |
| Tebuconazole.2                            | 10.0 | 308.2 | 125.0 | 86  | 10 | 55 | 8  |  |
| Tebufozide.1                              | 9.7  | 353.2 | 297.2 | 51  | 10 | 11 | 8  |  |
| Tebufozide.2                              | 9.7  | 353.2 | 133.0 | 51  | 10 | 23 | 8  |  |
| Tebufozpyrad.1                            | 11.7 | 334.0 | 145.0 | 116 | 10 | 37 | 8  |  |
| Tebufozpyrad.2                            | 11.7 | 334.0 | 117.0 | 116 | 10 | 47 | 8  |  |
| Tebutam.1                                 | 9.5  | 234.2 | 91.1  | 65  | 10 | 48 | 12 |  |
| Tebutam.2                                 | 9.5  | 234.2 | 192.4 | 65  | 10 | 16 | 12 |  |
| Tebuthiuron.1                             | 6.9  | 229.1 | 172.4 | 66  | 10 | 25 | 10 |  |
| Tebuthiuron.2                             | 6.9  | 229.1 | 116.1 | 66  | 10 | 37 | 6  |  |
| Teflubenzuron.1                           | 11.8 | 381.1 | 158.2 | 106 | 10 | 23 | 10 |  |
| Teflubenzuron.2                           | 11.8 | 381.1 | 141.2 | 106 | 10 | 47 | 8  |  |
| Tembotrion.1                              | 5.8  | 460.0 | 343.0 | 15  | 10 | 21 | 20 |  |
| Tembotrion.2                              | 5.8  | 460.0 | 264.0 | 15  | 10 | 43 | 30 |  |
| Temphos.1                                 | 11.8 | 467.0 | 419.1 | 96  | 10 | 27 | 12 |  |

|                           |      |       |       |    |    |    |    |                 |
|---------------------------|------|-------|-------|----|----|----|----|-----------------|
| Temephos.2                | 11.8 | 467.0 | 405.0 | 96 | 10 | 21 | 12 |                 |
| Terbufos-sulfone.1        | 8.2  | 321.1 | 115.0 | 66 | 10 | 35 | 10 |                 |
| Terbufos-sulfone.2        | 8.2  | 321.1 | 171.0 | 66 | 10 | 25 | 10 |                 |
| Terbufos-sulfoxide.1      | 8.2  | 305.0 | 187.0 | 71 | 10 | 27 | 12 |                 |
| Terbufos-sulfoxide.2      | 8.2  | 305.0 | 97.0  | 71 | 10 | 47 | 12 |                 |
| Terbumeton.1              | 8.4  | 226.1 | 170.1 | 41 | 10 | 23 | 10 |                 |
| Terbumeton.2              | 8.4  | 226.1 | 100.0 | 41 | 10 | 41 | 6  |                 |
| Terbuthylazine-desethyl.1 | 7.0  | 202.1 | 146.1 | 65 | 10 | 20 | 12 |                 |
| Terbuthylazine-desethyl.2 | 7.0  | 202.1 | 79.1  | 65 | 10 | 35 | 12 |                 |
| Terbutryn.1               | 9.4  | 242.1 | 186.1 | 36 | 10 | 25 | 12 |                 |
| Terbutryn.2               | 9.4  | 242.1 | 68.1  | 36 | 10 | 61 | 4  |                 |
| Tetrachlorvinphos.1       | 9.8  | 367.0 | 127.0 | 65 | 10 | 48 | 12 |                 |
| Tetrachlorvinphos.2       | 9.8  | 367.0 | 206.0 | 65 | 10 | 39 | 12 |                 |
| Tetraconazole.1           | 9.2  | 372.1 | 159.0 | 86 | 10 | 35 | 8  |                 |
| Tetraconazole.2           | 9.2  | 372.1 | 70.0  | 86 | 10 | 47 | 12 |                 |
| Tetrametrin NH4.1         | 11.3 | 349.2 | 164.1 | 60 | 10 | 35 | 8  |                 |
| Tetrametrin NH4.2         | 11.3 | 349.2 | 107.1 | 60 | 10 | 50 | 8  |                 |
| Thiabendazole.1           | 6.3  | 202.1 | 175.1 | 36 | 10 | 35 | 10 |                 |
| Thiabendazole.2           | 6.3  | 202.1 | 131.2 | 36 | 10 | 45 | 8  |                 |
| Thiacloprid.1             | 5.7  | 253.0 | 126.0 | 76 | 10 | 29 | 8  |                 |
| Thiacloprid.2             | 5.7  | 253.0 | 99.0  | 76 | 10 | 59 | 6  |                 |
| Thiamethoxam.1            | 4.2  | 292.0 | 211.0 | 56 | 10 | 17 | 14 | Thiamethoxam-d3 |
| Thiamethoxam.2            | 4.2  | 292.0 | 181.0 | 56 | 10 | 31 | 12 | Thiamethoxam-d3 |
| Thidiazuron.1             | 6.7  | 221.1 | 102.1 | 36 | 10 | 23 | 6  |                 |
| Thidiazuron.2             | 6.7  | 221.1 | 127.9 | 36 | 10 | 23 | 8  |                 |
| Thifensulfuron-methyl.1   | 4.7  | 388.0 | 167.1 | 65 | 10 | 35 | 12 |                 |
| Thifensulfuron-methyl.2   | 4.7  | 388.0 | 205.1 | 65 | 10 | 25 | 12 |                 |
| Thiodicarb.1              | 7.1  | 355.0 | 88.0  | 61 | 10 | 31 | 6  |                 |

|                           |      |       |       |     |    |    |    |  |
|---------------------------|------|-------|-------|-----|----|----|----|--|
| Thiodicarb.2              | 7.1  | 355.0 | 108.0 | 61  | 10 | 23 | 8  |  |
| Thiofanox.1               | 7.3  | 219.2 | 57.2  | 28  | 10 | 16 | 2  |  |
| Thiofanox.2               | 7.3  | 219.2 | 61.1  | 28  | 10 | 13 | 2  |  |
| Thiofanox-sulfone Na.1    | 5.1  | 273.0 | 215.9 | 141 | 10 | 19 | 22 |  |
| Thiofanox-sulfone Na.2    | 5.1  | 273.0 | 137.1 | 141 | 10 | 29 | 14 |  |
| Thiofanox-sulfone NH4.1   | 5.1  | 268.0 | 251.0 | 1   | 10 | 9  | 22 |  |
| Thiofanox-sulfone NH4.2   | 5.1  | 268.0 | 57.1  | 1   | 10 | 35 | 14 |  |
| Thiofanox-sulfone.1       | 5.1  | 251.1 | 57.2  | 61  | 10 | 40 | 12 |  |
| Thiofanox-sulfone.2       | 5.1  | 251.1 | 76.1  | 61  | 10 | 32 | 12 |  |
| Thiofanox-sulfone.3       | 5.1  | 251.0 | 56.9  | 96  | 10 | 23 | 26 |  |
| Thiofanox-sulfone.4       | 5.1  | 251.0 | 75.9  | 96  | 10 | 9  | 12 |  |
| Thiofanox-sulfoxide NH4.1 | 4.9  | 252.0 | 235.0 | 1   | 10 | 9  | 16 |  |
| Thiofanox-sulfoxide NH4.2 | 4.9  | 252.0 | 104.0 | 1   | 10 | 15 | 12 |  |
| Thiofanox-sulfoxide.1     | 4.9  | 235.0 | 103.9 | 101 | 10 | 11 | 12 |  |
| Thiofanox-sulfoxide.2     | 4.9  | 235.0 | 57.1  | 101 | 10 | 27 | 26 |  |
| Thiofanox-sulfoxide.3     | 4.9  | 235.0 | 104.0 | 91  | 10 | 11 | 14 |  |
| Thiofanox-sulfoxide.4     | 4.9  | 235.0 | 57.0  | 91  | 10 | 27 | 8  |  |
| Thionazin(zinophos).1     | 7.6  | 249.0 | 193.0 | 80  | 10 | 23 | 10 |  |
| Thionazin(zinophos).2     | 7.6  | 249.0 | 97.0  | 80  | 10 | 40 | 10 |  |
| Thiophanate.1             | 7.7  | 371.1 | 151.1 | 65  | 10 | 50 | 12 |  |
| Thiophanate.2             | 7.7  | 371.1 | 325.1 | 65  | 10 | 15 | 12 |  |
| Thiophanate-methyl.1      | 6.7  | 343.0 | 151.1 | 61  | 10 | 31 | 10 |  |
| Thiophanate-methyl.2      | 6.7  | 343.0 | 311.0 | 61  | 10 | 17 | 8  |  |
| Tolclofos-methyl.1        | 10.6 | 301.0 | 268.9 | 86  | 10 | 23 | 10 |  |
| Tolclofos-methyl.2        | 10.6 | 301.0 | 175.0 | 86  | 10 | 35 | 10 |  |
| Tolfenpyrad.1             | 11.8 | 384.0 | 197.0 | 191 | 10 | 47 | 18 |  |
| Tolfenpyrad.2             | 11.8 | 384.0 | 154.0 | 191 | 10 | 49 | 18 |  |
| Tralkoxydim.1             | 9.0  | 330.2 | 138.1 | 65  | 10 | 35 | 12 |  |

|                                   |      |       |       |    |    |    |    |  |
|-----------------------------------|------|-------|-------|----|----|----|----|--|
| Tralkoxydim.2                     | 9.0  | 330.2 | 96.0  | 65 | 10 | 50 | 12 |  |
| Triadimefon.1                     | 8.8  | 294.0 | 197.1 | 41 | 10 | 21 | 12 |  |
| Triadimefon.2                     | 8.8  | 294.0 | 225.0 | 41 | 10 | 19 | 14 |  |
| Triadimenol.1                     | 9.1  | 296.1 | 70.0  | 11 | 10 | 33 | 12 |  |
| Triadimenol.2                     | 9.1  | 296.1 | 227.1 | 11 | 10 | 17 | 16 |  |
| Triallate.1                       | 12.3 | 304.0 | 142.9 | 76 | 10 | 35 | 12 |  |
| Triallate.2                       | 12.3 | 304.0 | 82.9  | 76 | 10 | 50 | 12 |  |
| Triasulforon.1                    | 5.5  | 402.1 | 167.1 | 65 | 10 | 32 | 12 |  |
| Triasulforon.2                    | 5.5  | 402.1 | 141.1 | 65 | 10 | 39 | 12 |  |
| Triazophos.1                      | 9.0  | 314.0 | 162.0 | 65 | 10 | 38 | 12 |  |
| Triazophos.2                      | 9.0  | 314.2 | 119.0 | 65 | 10 | 53 | 12 |  |
| Trichlorfon.1                     | 5.3  | 256.9 | 109.1 | 66 | 10 | 25 | 6  |  |
| Trichlorfon.2                     | 5.3  | 256.9 | 79.0  | 66 | 10 | 50 | 8  |  |
| Tricyclazole.1                    | 5.9  | 190.0 | 163.0 | 76 | 10 | 33 | 10 |  |
| Tricyclazole.2                    | 5.9  | 190.0 | 136.0 | 76 | 10 | 39 | 8  |  |
| Trietazin.1                       | 9.2  | 230.1 | 104.0 | 65 | 10 | 48 | 12 |  |
| Trietazin.2                       | 9.2  | 230.1 | 67.9  | 65 | 10 | 52 | 12 |  |
| Trifloxystrobin.1                 | 11.0 | 409.0 | 186.0 | 61 | 10 | 21 | 12 |  |
| Trifloxystrobin.2                 | 11.0 | 409.0 | 206.0 | 61 | 10 | 19 | 14 |  |
| Triflumizole.1                    | 11.2 | 346.1 | 278.1 | 16 | 10 | 17 | 6  |  |
| Triflumizole.2                    | 11.2 | 346.1 | 73.0  | 16 | 10 | 27 | 4  |  |
| Triflumuron.1                     | 10.5 | 359.1 | 156.2 | 71 | 10 | 23 | 10 |  |
| Triflumuron.2                     | 10.5 | 359.1 | 139.0 | 71 | 10 | 45 | 8  |  |
| Triflusulfuron-methyl.1           | 7.0  | 493.1 | 264.2 | 65 | 10 | 32 | 12 |  |
| Triflusulfuron-methyl.2           | 7.0  | 493.1 | 96.0  | 65 | 10 | 48 | 12 |  |
| Trimethylphenyl-methylcarbamate.1 | 7.6  | 194.1 | 137.0 | 81 | 10 | 15 | 24 |  |
| Trimethylphenyl-methylcarbamate.2 | 7.6  | 194.1 | 107.0 | 81 | 10 | 51 | 12 |  |
| Triticonazole.1                   | 9.3  | 318.1 | 70.0  | 86 | 10 | 35 | 6  |  |

|                            |      |       |       |     |    |    |    |  |
|----------------------------|------|-------|-------|-----|----|----|----|--|
| Triticonazole.2            | 9.3  | 318.1 | 125.0 | 86  | 10 | 49 | 8  |  |
| Vamidothion.1              | 5.3  | 288.0 | 146.0 | 61  | 10 | 17 | 8  |  |
| Vamidothion.2              | 5.3  | 288.0 | 118.0 | 61  | 10 | 37 | 8  |  |
| Vamidothion-sulfoxide.1    | 4.0  | 304.2 | 201.0 | 71  | 10 | 22 | 12 |  |
| Vamidothion-sulfoxide.2    | 4.0  | 304.2 | 169.0 | 71  | 10 | 27 | 12 |  |
| Cinerin I.1                | 12.3 | 317.3 | 149.1 | 41  | 10 | 11 | 10 |  |
| Cinerin I.2                | 12.3 | 317.3 | 107.0 | 41  | 10 | 19 | 12 |  |
| Cinerin I.3                | 12.3 | 317.3 | 91.0  | 41  | 10 | 51 | 10 |  |
| Cinerin II.1               | 10.6 | 361.3 | 149.2 | 96  | 10 | 11 | 18 |  |
| Cinerin II.2               | 10.6 | 361.3 | 107.1 | 96  | 10 | 19 | 12 |  |
| Cinerin II.3               | 10.6 | 361.3 | 91.0  | 96  | 10 | 59 | 10 |  |
| Jasmolin I.1               | 12.8 | 331.3 | 163.2 | 56  | 10 | 11 | 18 |  |
| Jasmolin I.2               | 12.8 | 331.3 | 107.1 | 56  | 10 | 29 | 12 |  |
| Jasmolin I.3               | 12.8 | 331.3 | 91.1  | 56  | 10 | 51 | 10 |  |
| Jasmolin II.1              | 11.3 | 375.3 | 163.2 | 56  | 10 | 11 | 18 |  |
| Jasmolin II.2              | 11.3 | 375.3 | 107.1 | 56  | 10 | 29 | 12 |  |
| Jasmolin II.3              | 11.3 | 375.3 | 91.1  | 56  | 10 | 51 | 10 |  |
| Pyrethrin I.1              | 12.4 | 329.3 | 161.2 | 141 | 10 | 11 | 14 |  |
| Pyrethrin I.2              | 12.4 | 329.3 | 105.1 | 141 | 10 | 45 | 12 |  |
| Pyrethrin I.3              | 12.4 | 329.3 | 128.1 | 141 | 10 | 53 | 14 |  |
| Pyrethrin II.1             | 10.7 | 373.3 | 161.2 | 141 | 10 | 11 | 14 |  |
| Pyrethrin II.2             | 10.7 | 373.3 | 105.1 | 141 | 10 | 45 | 12 |  |
| Pyrethrin II.3             | 10.7 | 373.3 | 128.1 | 141 | 10 | 53 | 14 |  |
| Acetamiprid-d3.1           | 5.3  | 226.0 | 126.0 | 68  | 10 | 29 | 8  |  |
| Atrazine-d5.1              | 7.5  | 221.0 | 179.0 | 56  | 10 | 25 | 15 |  |
| Atrazine-d5.2              | 7.5  | 221.0 | 104.0 | 56  | 10 | 39 | 15 |  |
| Atrazine-desisopropyl-d5.1 | 4.7  | 179.0 | 105.0 | 51  | 10 | 31 | 14 |  |
| Atrazine-desisopropyl-d5.2 | 4.7  | 179.0 | 104.0 | 51  | 10 | 31 | 14 |  |

|                     |      |       |       |    |    |    |    |  |
|---------------------|------|-------|-------|----|----|----|----|--|
| Boscalid-d4.1       | 8.6  | 347.0 | 311.0 | 35 | 10 | 27 | 8  |  |
| Carbaryl-d7.1       | 7.0  | 209.0 | 152.0 | 51 | 10 | 13 | 8  |  |
| Carbendazim-d3.1    | 5.8  | 195.0 | 160.2 | 61 | 10 | 25 | 10 |  |
| Carbendazim-d3.2    | 5.8  | 195.0 | 132.1 | 61 | 10 | 41 | 8  |  |
| Chlorotoluron-d6.1  | 7.3  | 219.0 | 78.0  | 68 | 10 | 31 | 4  |  |
| Chlorotoluron-d6.2  | 7.3  | 219.0 | 52.0  | 68 | 10 | 35 | 8  |  |
| Cyromazine-d4.1     | 2.9  | 171.0 | 86.0  | 89 | 10 | 26 | 4  |  |
| Cyromazine-d4.2     | 2.9  | 171.0 | 87.0  | 89 | 10 | 26 | 4  |  |
| Diazinon-d10.1      | 10.3 | 315.0 | 170.0 | 61 | 10 | 29 | 14 |  |
| Diazinon-d10.2      | 10.3 | 315.0 | 154.0 | 61 | 10 | 41 | 14 |  |
| Dichlorvos-d6.1     | 6.7  | 227.0 | 115.0 | 60 | 10 | 35 | 14 |  |
| Dichlorvos-d6.2     | 6.7  | 227.0 | 95.0  | 60 | 10 | 50 | 14 |  |
| Difenoconazole-d4.1 | 10.8 | 410.0 | 255.0 | 46 | 10 | 41 | 2  |  |
| Diffenican-d3.1     | 11.1 | 398.0 | 268.0 | 65 | 10 | 35 | 12 |  |
| Diffenican-d3.2     | 11.1 | 398.0 | 269.0 | 65 | 10 | 35 | 12 |  |
| Dimethoate-d6.1     | 5.3  | 236.0 | 205.0 | 46 | 10 | 13 | 12 |  |
| Dimethoate-d6.2     | 5.3  | 236.0 | 131.0 | 46 | 10 | 29 | 8  |  |
| Fipronil-13C3.1     | 9.7  | 441.0 | 372.0 | 96 | 10 | 23 | 9  |  |
| Fipronil-13C3.1     | 9.7  | 441.0 | 293.0 | 96 | 10 | 37 | 7  |  |
| Fluopyram-d4.1      | 9.1  | 402.0 | 209.0 | 15 | 10 | 29 | 24 |  |
| Imidacloprid-d4.1   | 4.9  | 260.0 | 213.0 | 61 | 10 | 21 | 14 |  |
| Imidacloprid-d4.2   | 4.9  | 260.0 | 212.0 | 61 | 10 | 21 | 14 |  |
| Malathion-d6.1      | 8.7  | 337.0 | 291.0 | 61 | 10 | 11 | 12 |  |
| Malathion-d6.2      | 8.7  | 337.0 | 127.0 | 61 | 10 | 19 | 12 |  |
| Methamidophos-d6.1  | 1.8  | 148.0 | 97.0  | 51 | 10 | 25 | 6  |  |
| Metolachlor-d6.1    | 9.5  | 290.0 | 258.0 | 65 | 10 | 20 | 12 |  |
| Metolachlor-d6.2    | 9.5  | 290.0 | 182.0 | 65 | 10 | 35 | 12 |  |
| Napropamide-d10.1   | 9.4  | 282.0 | 171.0 | 56 | 10 | 35 | 12 |  |



|                     |      |       |       |    |    |    |    |  |
|---------------------|------|-------|-------|----|----|----|----|--|
| Napropamide-d10.2   | 9.4  | 282.0 | 128.0 | 56 | 10 | 53 | 12 |  |
| Pendimethalin-d5.1  | 12.3 | 287.0 | 213.0 | 46 | 10 | 15 | 12 |  |
| Pendimethalin-d5.2  | 12.3 | 287.0 | 194.0 | 46 | 10 | 23 | 12 |  |
| Pyraclostrobin-d3.1 | 10.4 | 391.0 | 197.0 | 51 | 10 | 17 | 14 |  |
| Pyrimethanil-d5.1   | 8.5  | 205.0 | 108.0 | 86 | 10 | 33 | 6  |  |
| Pyrimethanil-d5.2   | 8.5  | 205.0 | 109.0 | 86 | 10 | 33 | 6  |  |
| Thiamethoxam-d3.1   | 4.2  | 295.0 | 214.0 | 56 | 10 | 17 | 14 |  |
| Thiamethoxam-d3.2   | 4.2  | 295.0 | 184.0 | 56 | 10 | 31 | 12 |  |
| Tebuconazole-13C3.1 | 10.4 | 311.0 | 70.0  | 86 | 10 | 51 | 10 |  |
| Tebuconazole-13C3.2 | 10.4 | 311.0 | 125.0 | 86 | 10 | 55 | 8  |  |
| Thiabendazole-d4.1  | 6.3  | 206.0 | 179.0 | 36 | 10 | 35 | 10 |  |
| Thiabendazole-d4.2  | 6.3  | 206.0 | 178.0 | 36 | 10 | 35 | 10 |  |
| TPP.1               | 10.5 | 326.9 | 214.9 | 1  | 10 | 35 | 24 |  |
| TPP.2               | 10.5 | 326.9 | 152.0 | 1  | 10 | 45 | 18 |  |
| TPP.3               | 10.5 | 326.9 | 77.0  | 1  | 10 | 71 | 10 |  |
| Zoxamide.1          | 10.2 | 336.1 | 187.0 | 61 | 10 | 29 | 12 |  |
| Zoxamide.2          | 10.2 | 336.1 | 159.0 | 61 | 10 | 55 | 10 |  |

**Table S2. (a):** Validation data for 330 pesticides in groundwater: recovery% and precision (RSD%) at 10 and 100 ng/L levels. Results were calculated from ten replicates at each level. **(b):** Validation data for 330 pesticides in surface water: recovery% and precision (RSD%) at 10 and 100 ng/L levels. Results were calculated from ten replicates at each level.

| (a)                   |                     |                |                      |                 |
|-----------------------|---------------------|----------------|----------------------|-----------------|
| Compound              | Recovery% (10 ng/L) | RSD% (10 ng/L) | Recovery% (100 ng/L) | RSD% (100 ng/L) |
| (Monceren)Pencycuron  | 92                  | 6.57           | 80                   | 2.20            |
| 3-Hydroxycarbofuran   | 88                  | 6.06           | 93                   | 2.58            |
| Acephate              | 71                  | 19.45          | 116                  | 6.27            |
| Acetamiprid           | 96                  | 19.29          | 102                  | 5.42            |
| Acibenzolar-S-methyl  | 108                 | 5.99           | 81                   | 2.19            |
| Aldicarb              | 108                 | 9.68           | 94                   | 2.42            |
| Aldicarb-sulfone      | 110                 | 12.46          | 95                   | 3.50            |
| Aldicarb-sulfoxide    | 89                  | 12.46          | 96                   | 3.21            |
| Ametoctradin          | 96                  | 8.44           | 89                   | 4.58            |
| Ametryn               | 86                  | 7.24           | 92                   | 4.42            |
| Amidosulfuron         | 104                 | 12.91          | 98                   | 4.21            |
| Aminocarb             | 88                  | 8.91           | 97                   | 4.69            |
| Amitraz               | 102                 | 6.38           | 86                   | 2.32            |
| Anilofos              | 88                  | 3.42           | 83                   | 2.23            |
| Atrazine              | 102                 | 5.42           | 102                  | 4.37            |
| Atrazine-desethyl     | 78                  | 3.92           | 101                  | 3.04            |
| Atrazine-desisopropyl | 106                 | 4.89           | 96                   | 2.90            |
| Azaconazole           | 84                  | 7.81           | 98                   | 1.27            |
| Azamethiphos          | 85                  | 7.36           | 99                   | 3.44            |
| Azinphos-ethyl        | 115                 | 14.36          | 90                   | 2.00            |
| Azinphos-methyl       | 100                 | 10.62          | 92                   | 3.40            |
| Aziprotryne           | 73                  | 10.90          | 92                   | 11.77           |
| Azoxystrobin          | 89                  | 19.50          | 91                   | 2.71            |

|                           |     |       |     |      |
|---------------------------|-----|-------|-----|------|
| Benalaxyl                 | 96  | 4.45  | 94  | 1.74 |
| Bendiocarb                | 101 | 8.67  | 96  | 3.04 |
| Benflutamid               | 76  | 8.08  | 93  | 3.69 |
| Bensulfuron-metil         | 98  | 5.69  | 89  | 2.50 |
| Benthiavalicarb-isopropyl | 79  | 13.96 | 94  | 5.30 |
| Benzolyp-prop-ethyl       | 92  | 9.12  | 97  | 3.13 |
| Benzoximate               | 87  | 8.26  | 79  | 3.39 |
| Benzthiazuron             | 81  | 7.25  | 79  | 4.20 |
| Bifenazate                | 93  | 7.63  | 106 | 4.47 |
| Bitertanol                | 95  | 9.19  | 93  | 3.59 |
| Boscalid                  | 120 | 10.05 | 97  | 4.92 |
| Bromucanazole-Isomer      | 110 | 12.42 | 87  | 5.07 |
| Bupirimate                | 87  | 6.11  | 92  | 2.56 |
| Buprofezin                | 71  | 8.92  | 69  | 1.52 |
| Butafenacil               | 104 | 4.18  | 95  | 2.71 |
| Butocarboxim-sulfoxide    | 77  | 6.69  | 97  | 3.09 |
| Butoxycarboxim            | 73  | 7.04  | 81  | 3.61 |
| Buturon                   | 88  | 19.44 | 97  | 4.19 |
| Cadusafos                 | 96  | 5.66  | 96  | 2.55 |
| Carbaryl                  | 90  | 12.82 | 74  | 2.73 |
| Carbendazim               | 97  | 6.65  | 105 | 2.41 |
| Carbetamide               | 113 | 6.25  | 108 | 1.87 |
| Carbofuran                | 104 | 3.46  | 107 | 2.33 |
| Carboxin                  | 97  | 4.86  | 97  | 1.66 |
| Carfentrazon              | 116 | 6.89  | 94  | 2.51 |
| Carfentrazon-ethyl        | 79  | 7.03  | 74  | 4.09 |
| Chlorantraniliprole       | 112 | 5.90  | 105 | 3.25 |
| Chlorbromuron             | 64  | 19.96 | 88  | 5.54 |
| Chlorfenvinphos           | 89  | 3.00  | 88  | 2.56 |

|                          |     |       |     |      |
|--------------------------|-----|-------|-----|------|
| Chlorfluazuron           | 115 | 7.61  | 64  | 6.26 |
| Chloridazon              | 107 | 13.84 | 104 | 4.26 |
| Chlorotoluron            | 110 | 5.56  | 108 | 2.86 |
| Chloroxuron              | 107 | 8.01  | 97  | 2.99 |
| Chlorpyrifos             | 119 | 17.84 | 98  | 7.15 |
| Chlorpyrifos-methyl      | 106 | 20.00 | 93  | 5.31 |
| Chlorsulfuron            | 97  | 13.61 | 97  | 2.28 |
| Chromafenozide           | 99  | 6.97  | 99  | 3.22 |
| Cinosulfuron             | 99  | 3.05  | 100 | 2.39 |
| Cirimidine               | 99  | 13.12 | 89  | 3.24 |
| Clethodim-Isomer         | 91  | 16.23 | 81  | 2.40 |
| Clomazone                | 96  | 3.56  | 94  | 2.75 |
| Cloquintocet-mexyl       | 104 | 6.41  | 80  | 2.96 |
| Clothianidin             | 111 | 12.44 | 106 | 2.60 |
| Coumaphos                | 79  | 13.06 | 82  | 3.50 |
| Crufomat(Ruelene)        | 78  | 7.71  | 87  | 4.53 |
| Cyanazine                | 118 | 11.85 | 97  | 5.00 |
| Cyazofamid               | 98  | 7.37  | 87  | 2.52 |
| Cybutrine                | 96  | 11.91 | 99  | 1.46 |
| Cyflufenamid             | 110 | 7.65  | 98  | 4.00 |
| Cymiazole                | 117 | 5.68  | 96  | 4.22 |
| Cymoxanil                | 99  | 12.17 | 106 | 5.12 |
| Cyproconazole-Isomer     | 82  | 8.57  | 100 | 3.36 |
| Cyprodinil               | 100 | 10.11 | 63  | 4.41 |
| Cyromazine               | 90  | 10.54 | 102 | 3.52 |
| Demeton-S                | 96  | 19.55 | 108 | 3.45 |
| Demeton-S-methylsulphone | 101 | 3.09  | 100 | 1.46 |
| Demeton-S-sulfoxide      | 102 | 3.75  | 100 | 3.58 |
| Desmedipham              | 115 | 4.53  | 104 | 3.14 |

|                        |     |       |     |      |
|------------------------|-----|-------|-----|------|
| Desmetryn              | 106 | 7.35  | 91  | 1.64 |
| Diazinon               | 95  | 8.30  | 107 | 3.96 |
| Diclobutrazol          | 94  | 6.35  | 100 | 3.45 |
| Dicrotophos            | 84  | 5.53  | 83  | 3.29 |
| Diethofencarb          | 105 | 5.79  | 104 | 1.99 |
| Difenoconazole-Isomer  | 107 | 8.98  | 84  | 3.41 |
| Difenoxyuron           | 97  | 4.97  | 96  | 2.31 |
| Diflubenzuron          | 99  | 8.92  | 79  | 3.42 |
| Diflufenican           | 96  | 7.29  | 80  | 3.02 |
| Dimefox                | 86  | 4.29  | 86  | 1.58 |
| Dimefuron              | 70  | 10.56 | 82  | 4.02 |
| Dimethachlor           | 91  | 7.58  | 86  | 4.02 |
| Dimethenamid           | 100 | 5.38  | 92  | 2.55 |
| Dimethirimol           | 97  | 5.63  | 90  | 1.96 |
| Dimethoate             | 108 | 3.60  | 102 | 3.83 |
| Dimethomorph-Isomer    | 98  | 12.38 | 86  | 5.57 |
| Dimoxystrobin          | 113 | 3.77  | 99  | 2.44 |
| Diniconazole           | 108 | 7.81  | 98  | 3.23 |
| Dioxacarb              | 105 | 6.40  | 105 | 1.60 |
| Diphenamid             | 97  | 2.90  | 91  | 1.53 |
| Dipropetryn            | 86  | 7.29  | 91  | 3.14 |
| Diuron                 | 94  | 6.76  | 101 | 2.53 |
| Dodemorph              | 89  | 8.34  | 110 | 7.43 |
| Emamectin-benzoate b1a | 96  | 4.73  | 110 | 6.93 |
| Epoxiconazole          | 93  | 7.10  | 85  | 4.45 |
| Etaconazole-Isomer     | 90  | 13.12 | 98  | 3.23 |
| Ethidimuron            | 115 | 8.83  | 108 | 3.28 |
| Ethiofencarb           | 108 | 8.04  | 100 | 2.56 |
| Ethiofencarb-sulfone   | 115 | 5.77  | 109 | 1.75 |

|                        |     |       |     |       |
|------------------------|-----|-------|-----|-------|
| Ethiofencarb-sulfoxide | 104 | 4.87  | 117 | 2.22  |
| Ethion                 | 98  | 14.27 | 91  | 5.91  |
| Ethiprole              | 113 | 18.96 | 84  | 5.28  |
| Ethirimol              | 92  | 6.30  | 92  | 2.13  |
| Ethoprophos            | 88  | 8.86  | 78  | 6.05  |
| Etoxazole              | 93  | 8.17  | 85  | 3.99  |
| Etrimfos               | 89  | 3.79  | 80  | 3.90  |
| Fenamidone             | 92  | 7.59  | 97  | 2.19  |
| Fenamiphos             | 94  | 6.32  | 84  | 1.46  |
| Fenamiphos-sulfone     | 76  | 14.16 | 79  | 4.33  |
| Fenamiphos-sulfoxide   | 77  | 13.39 | 85  | 4.16  |
| Fenarimol              | 100 | 13.71 | 99  | 7.68  |
| Fenbuconazole          | 96  | 10.76 | 83  | 3.64  |
| Fenfuram               | 108 | 7.26  | 96  | 1.19  |
| Fenhexamid             | 106 | 13.17 | 97  | 4.07  |
| Fenobucarb             | 78  | 7.53  | 88  | 2.11  |
| Fenoxycarb             | 87  | 12.78 | 81  | 5.26  |
| Fenpropimorph          | 117 | 7.63  | 108 | 3.39  |
| Fensulfothion          | 85  | 14.68 | 86  | 3.79  |
| Fensulfothion-oxon     | 98  | 12.00 | 93  | 5.95  |
| Fensulfothion-sulfone  | 95  | 10.58 | 92  | 4.71  |
| Fenthion-sulfoxid      | 81  | 9.28  | 87  | 4.26  |
| Fenuron                | 69  | 5.07  | 94  | 3.40  |
| Flamprop-isopropyl     | 114 | 11.47 | 99  | 5.02  |
| Flamprop-methyl        | 92  | 4.31  | 95  | 3.03  |
| Flazasulfuron          | 96  | 5.58  | 98  | 3.31  |
| Flonicamid             | 104 | 19.09 | 93  | 3.02  |
| Florasulam             | 78  | 12.16 | 94  | 4.80  |
| Fluazuron              | 114 | 13.50 | 77  | 13.02 |

|                         |     |       |     |      |
|-------------------------|-----|-------|-----|------|
| Flubendiamide           | 100 | 16.54 | 90  | 5.99 |
| Flufenacet              | 118 | 7.76  | 118 | 3.50 |
| Flufenoxuron            | 109 | 12.64 | 84  | 4.38 |
| Fluometuron             | 91  | 6.71  | 97  | 3.58 |
| Fluopicolide            | 107 | 11.33 | 96  | 3.22 |
| Fluopyram               | 97  | 11.03 | 110 | 4.50 |
| Fluoxastrobin           | 100 | 5.70  | 80  | 3.71 |
| Fluquinconazole         | 85  | 16.16 | 93  | 5.91 |
| Fluridone               | 102 | 4.57  | 91  | 3.47 |
| Flusilazole             | 96  | 5.35  | 100 | 2.51 |
| Flutolanil              | 101 | 5.14  | 97  | 2.89 |
| Flutriafol              | 81  | 18.94 | 106 | 2.15 |
| Fluxapyroxad            | 111 | 5.36  | 109 | 3.95 |
| Fonofos                 | 82  | 16.50 | 71  | 6.92 |
| Foramsulfuron           | 103 | 3.67  | 100 | 2.55 |
| Forchlorfenuron         | 109 | 5.93  | 100 | 4.42 |
| Formetanate HCl         | 104 | 3.22  | 92  | 2.06 |
| Fosthiazat              | 117 | 5.74  | 109 | 2.38 |
| Fuberidazole            | 93  | 10.10 | 96  | 1.20 |
| Furalaxyl               | 92  | 5.24  | 97  | 2.23 |
| Furathiocarb            | 95  | 4.59  | 71  | 2.82 |
| Halofenozide            | 86  | 17.42 | 102 | 6.21 |
| Haloxypop-2-ethoxyethyl | 100 | 7.59  | 73  | 2.96 |
| Haloxypop-P-methyl      | 82  | 9.98  | 92  | 2.10 |
| Heptenophos             | 81  | 12.24 | 83  | 4.10 |
| Hexaconazole            | 110 | 5.69  | 105 | 2.89 |
| Hexaflumuron            | 119 | 10.19 | 114 | 4.99 |
| Hexazonon(Velpar)       | 109 | 3.07  | 102 | 2.30 |
| Hydramethylnon          | 91  | 4.48  | 95  | 2.52 |

|                   |     |       |     |       |
|-------------------|-----|-------|-----|-------|
| Hydroxycarbofuran | 98  | 10.56 | 101 | 3.73  |
| Imazalil          | 105 | 7.22  | 82  | 4.17  |
| Imazaquin         | 85  | 17.99 | 98  | 3.49  |
| Imidacloprid      | 85  | 20.00 | 102 | 4.53  |
| Indoxacarb        | 82  | 17.75 | 72  | 3.74  |
| Ipconazole        | 94  | 6.34  | 94  | 3.53  |
| Iprobenfos        | 98  | 6.74  | 97  | 3.38  |
| Iprovalicarb      | 101 | 4.35  | 97  | 3.52  |
| Isocarbamide      | 106 | 8.32  | 96  | 3.12  |
| Isofenphos        | 108 | 7.33  | 97  | 7.27  |
| Isofenphos-methyl | 90  | 11.69 | 80  | 5.39  |
| Isoprocab         | 95  | 9.50  | 87  | 2.98  |
| Isoprothiolane    | 117 | 7.94  | 96  | 3.19  |
| Isoproturon       | 103 | 5.36  | 98  | 1.82  |
| Isoxaflutole      | 109 | 9.58  | 98  | 3.35  |
| Isoxathion        | 100 | 8.76  | 97  | 4.45  |
| Ivermectin        | 112 | 8.83  | 77  | 10.31 |
| izoxaben          | 106 | 8.19  | 90  | 2.88  |
| Kresoxim-methyl   | 108 | 16.50 | 84  | 2.66  |
| Lenacil           | 93  | 11.93 | 97  | 3.28  |
| Lufenuron         | 101 | 13.84 | 110 | 4.96  |
| Malaoxon          | 104 | 9.02  | 102 | 3.44  |
| Malathion         | 104 | 14.31 | 112 | 8.05  |
| Mandipropamid     | 107 | 4.13  | 99  | 3.94  |
| Mecarbam          | 92  | 7.71  | 83  | 5.08  |
| Mefenacet         | 86  | 5.87  | 73  | 3.19  |
| Mepanipyrim       | 93  | 14.78 | 82  | 2.88  |
| Mephosfolan       | 98  | 2.27  | 101 | 1.22  |
| Mepronil          | 102 | 4.22  | 97  | 3.22  |



|                    |     |       |     |      |
|--------------------|-----|-------|-----|------|
| Mesotrione         | 92  | 2.66  | 84  | 3.21 |
| Metaflumizone      | 113 | 11.15 | 75  | 3.23 |
| Metalaxyl          | 97  | 7.68  | 108 | 4.74 |
| Metamitron         | 92  | 9.90  | 94  | 4.49 |
| Metazachlor        | 101 | 8.92  | 98  | 1.54 |
| Metconazole        | 107 | 9.02  | 105 | 2.83 |
| Methabenzthiazuron | 105 | 3.89  | 91  | 1.71 |
| Methamidophos      | 97  | 7.66  | 104 | 3.50 |
| Methidathion       | 97  | 17.98 | 97  | 4.62 |
| Methiocarb         | 88  | 5.25  | 85  | 3.50 |
| Methiocarb-sulfone | 84  | 16.53 | 94  | 4.72 |
| Methomyl           | 109 | 6.36  | 102 | 3.70 |
| Methoprotryne      | 99  | 4.97  | 94  | 2.69 |
| Methoxyfenozide    | 101 | 6.86  | 102 | 1.93 |
| Metobromuron       | 99  | 12.34 | 96  | 3.90 |
| Metolachlor        | 109 | 4.13  | 99  | 4.49 |
| Metolcarb          | 111 | 6.67  | 92  | 3.62 |
| Metosulam          | 88  | 8.70  | 98  | 3.38 |
| Metoxuron          | 92  | 8.48  | 92  | 3.13 |
| Metrafenon         | 97  | 7.18  | 78  | 3.29 |
| Metsulfuron-methyl | 99  | 6.68  | 101 | 6.68 |
| Mevinphos-Isomer   | 108 | 15.30 | 109 | 3.36 |
| Mexacarbate        | 102 | 3.95  | 93  | 2.24 |
| Molinate           | 107 | 11.11 | 96  | 8.36 |
| Monocrotophos      | 75  | 7.33  | 82  | 3.03 |
| Monolinuron        | 111 | 4.67  | 97  | 2.34 |
| Moxidectin         | 109 | 14.79 | 92  | 4.16 |
| Myclobutanil       | 101 | 6.16  | 90  | 3.09 |
| Napropamide        | 110 | 5.82  | 106 | 3.92 |

|                    |     |       |     |       |
|--------------------|-----|-------|-----|-------|
| Neburon            | 91  | 5.91  | 95  | 3.57  |
| Nitenpyram         | 106 | 9.53  | 94  | 4.11  |
| Nitralin           | 110 | 12.66 | 93  | 4.98  |
| Norflurazon        | 96  | 7.43  | 96  | 4.26  |
| Novaluron          | 110 | 6.68  | 110 | 4.58  |
| Nuarimol           | 101 | 11.02 | 99  | 4.01  |
| Omethoate          | 95  | 6.30  | 98  | 2.14  |
| Oxadiazon          | 92  | 13.46 | 86  | 2.95  |
| Oxadixyl           | 110 | 13.26 | 100 | 4.92  |
| Oxamyl             | 113 | 6.28  | 98  | 2.45  |
| Oxamyl-oxime       | 92  | 9.44  | 100 | 2.33  |
| Oxydemeton-methyl  | 99  | 3.68  | 104 | 0.95  |
| Paclobutrazol      | 91  | 8.35  | 95  | 2.90  |
| Paraoxon           | 72  | 2.67  | 84  | 5.54  |
| Paraoxon-ethyl     | 80  | 5.10  | 84  | 4.01  |
| Penconazole        | 88  | 8.44  | 96  | 5.28  |
| Penthiopyrad       | 106 | 5.19  | 107 | 2.54  |
| Pethoxamid         | 96  | 4.21  | 86  | 3.37  |
| Phenmedipham       | 81  | 6.68  | 79  | 5.69  |
| Phenthoate         | 104 | 10.86 | 87  | 5.16  |
| Phorate-sulfone    | 104 | 19.54 | 98  | 6.20  |
| Phorate-sulfoxide  | 120 | 9.70  | 106 | 1.80  |
| Phosalone          | 70  | 12.68 | 96  | 2.49  |
| Phosmet            | 87  | 11.60 | 70  | 10.45 |
| Phosphamidon       | 98  | 7.62  | 88  | 3.48  |
| Phoxim             | 115 | 7.83  | 100 | 3.85  |
| Picoxystrobin      | 103 | 7.72  | 91  | 2.13  |
| Pinoxaden          | 102 | 3.01  | 96  | 2.53  |
| Piperonyl-butoxide | 100 | 7.53  | 93  | 3.49  |

|                               |     |       |     |      |
|-------------------------------|-----|-------|-----|------|
| Piperophos                    | 103 | 3.50  | 83  | 2.11 |
| Pirimicarb                    | 98  | 4.61  | 95  | 2.16 |
| Pirimicarb-desmethyl          | 98  | 5.81  | 92  | 2.74 |
| Pirimiphos-ethyl              | 102 | 6.86  | 86  | 2.67 |
| Pirimiphos-methyl             | 96  | 7.54  | 79  | 2.64 |
| Pirimisulfuron-metil          | 107 | 8.34  | 95  | 4.57 |
| Prochloraz                    | 115 | 5.83  | 93  | 2.30 |
| Prochloraz-desimidazole-amino | 92  | 6.45  | 100 | 6.94 |
| Promecarb                     | 93  | 10.06 | 86  | 2.95 |
| Prometon                      | 104 | 5.71  | 94  | 5.42 |
| Prometryne                    | 99  | 3.22  | 91  | 1.25 |
| Propachlor                    | 92  | 7.63  | 97  | 3.35 |
| Propamocarb                   | 100 | 4.86  | 98  | 1.06 |
| Propanil                      | 97  | 12.01 | 95  | 6.22 |
| Propargite                    | 108 | 4.36  | 108 | 3.44 |
| Propetamphos                  | 102 | 10.78 | 92  | 5.31 |
| Propiconazole                 | 84  | 10.54 | 97  | 2.94 |
| Propoxur                      | 116 | 3.64  | 107 | 2.74 |
| Propyzamide                   | 110 | 15.91 | 100 | 4.24 |
| Prosulfocarb                  | 92  | 4.50  | 83  | 2.30 |
| Pymetrozine                   | 98  | 3.99  | 98  | 3.15 |
| Pyracarbolid                  | 89  | 4.06  | 90  | 1.68 |
| Pyraclostrobin                | 94  | 8.53  | 107 | 5.66 |
| Pyraflufen-ethyl              | 86  | 9.94  | 83  | 6.28 |
| Pyrazophos                    | 89  | 9.53  | 91  | 4.00 |
| Pyridafol                     | 102 | 9.14  | 100 | 2.61 |
| Pyridaphenthion               | 80  | 5.58  | 90  | 3.52 |
| Pyrifenox                     | 104 | 2.77  | 90  | 2.62 |
| Pyrimethanil                  | 90  | 9.12  | 83  | 3.81 |

|                         |     |       |     |      |
|-------------------------|-----|-------|-----|------|
| Pyroquilon              | 98  | 11.53 | 87  | 4.31 |
| Quinalphos              | 92  | 19.00 | 76  | 2.86 |
| Sebuthylazin            | 97  | 8.37  | 95  | 2.94 |
| Secbumeton              | 101 | 3.52  | 95  | 1.08 |
| Silthiofam              | 98  | 6.32  | 90  | 2.81 |
| Simazine                | 92  | 10.32 | 97  | 2.70 |
| Simetryn                | 98  | 6.03  | 93  | 1.11 |
| Spinetoram              | 118 | 10.87 | 102 | 2.98 |
| Spiromesifen            | 84  | 13.66 | 85  | 6.04 |
| Spirotetramat           | 109 | 4.76  | 98  | 3.89 |
| Spiroxamine-Isomer      | 89  | 2.38  | 94  | 1.82 |
| Sulfometuron-methyl     | 96  | 3.39  | 90  | 2.49 |
| Sulfosulfuron           | 99  | 10.06 | 105 | 1.82 |
| Tebuconazole            | 91  | 9.47  | 103 | 2.44 |
| Tebufenozide            | 109 | 8.43  | 100 | 3.51 |
| Tebufenpyrad            | 87  | 5.45  | 77  | 5.02 |
| Tebutam                 | 102 | 6.38  | 93  | 2.63 |
| Tebuthiuron             | 93  | 4.12  | 92  | 1.65 |
| Terbufos-sulfoxide      | 114 | 4.56  | 113 | 3.16 |
| Terbumeton              | 96  | 2.22  | 94  | 2.01 |
| Terbuthylazine-desethyl | 88  | 15.63 | 93  | 1.42 |
| Terbutryn               | 89  | 3.83  | 92  | 2.23 |
| Tetrachlorvinphos       | 86  | 15.54 | 79  | 3.81 |
| Tetraconazole           | 102 | 8.43  | 97  | 5.81 |
| Thiabendazole           | 103 | 4.25  | 101 | 3.65 |
| Thiacloprid             | 89  | 8.51  | 96  | 3.06 |
| Thiamethoxam            | 100 | 7.73  | 103 | 2.37 |
| Thidiazuron             | 109 | 6.55  | 106 | 4.64 |
| Thifensulfuron-methyl   | 100 | 4.53  | 99  | 3.19 |

|                                 |                            |                       |                             |                        |
|---------------------------------|----------------------------|-----------------------|-----------------------------|------------------------|
| Thiodicarb                      | 105                        | 7.63                  | 103                         | 3.75                   |
| Thiofanox-sulfoxide             | 78                         | 19.14                 | 101                         | 2.57                   |
| Thiophanate                     | 114                        | 6.49                  | 84                          | 4.87                   |
| Thiophanate-methyl              | 93                         | 10.10                 | 87                          | 6.53                   |
| Tralkoxydim                     | 97                         | 12.28                 | 77                          | 4.84                   |
| Triadimefon                     | 100                        | 8.62                  | 97                          | 2.91                   |
| Triadimenol                     | 107                        | 12.20                 | 99                          | 6.73                   |
| Triasulforon                    | 90                         | 11.42                 | 99                          | 2.85                   |
| Triazophos                      | 94                         | 5.51                  | 84                          | 2.91                   |
| Tricyclazole                    | 95                         | 5.63                  | 99                          | 2.87                   |
| Trietazin                       | 108                        | 10.48                 | 100                         | 5.49                   |
| Trifloxystrobin                 | 91                         | 9.76                  | 73                          | 3.81                   |
| Triflumizole                    | 89                         | 4.20                  | 99                          | 3.18                   |
| Triflumuron                     | 112                        | 7.70                  | 95                          | 4.60                   |
| Triflusulfuron-methyl           | 90                         | 6.23                  | 94                          | 1.93                   |
| Trimethylphenyl-methylcarbamate | 86                         | 10.69                 | 92                          | 11.97                  |
| Triticonazole                   | 107                        | 7.54                  | 102                         | 5.03                   |
| Vamidothion                     | 109                        | 2.98                  | 104                         | 1.72                   |
| Vamidothion-sulfoxide           | 113                        | 6.68                  | 101                         | 1.29                   |
| Zoxamide                        | 107                        | 3.99                  | 96                          | 3.48                   |
| (b)                             |                            |                       |                             |                        |
| <b>Compound</b>                 | <b>Recovery% (10 ng/L)</b> | <b>RSD% (10 ng/L)</b> | <b>Recovery% (100 ng/L)</b> | <b>RSD% (100 ng/L)</b> |
| (Monceren)Pencycuron            | 100                        | 3.81                  | 79                          | 1.78                   |
| 3-Hydroxycarbofuran             | 94                         | 7.41                  | 89                          | 2.10                   |
| Acephate                        | 65                         | 19.70                 | 116                         | 1.45                   |
| Acetamiprid                     | 94                         | 4.47                  | 105                         | 2.36                   |
| Acibenzolar-S-methyl            | 87                         | 18.65                 | 81                          | 8.50                   |
| Aldicarb                        | 110                        | 14.82                 | 100                         | 6.71                   |
| Aldicarb-sulfone                | 104                        | 7.16                  | 101                         | 3.26                   |

|                           |     |       |     |       |
|---------------------------|-----|-------|-----|-------|
| Aldicarb-sulfoxide        | 102 | 11.85 | 84  | 3.47  |
| Ametoctradin              | 100 | 3.56  | 95  | 3.25  |
| Ametryn                   | 92  | 5.57  | 94  | 1.52  |
| Amidosulfuron             | 108 | 6.56  | 98  | 1.56  |
| Aminocarb                 | 90  | 6.37  | 99  | 1.37  |
| Amitraz                   | 114 | 10.77 | 90  | 2.51  |
| Anilofos                  | 95  | 6.90  | 82  | 4.36  |
| Atrazine                  | 98  | 9.63  | 102 | 4.23  |
| Atrazine-desethyl         | 87  | 11.34 | 100 | 3.14  |
| Atrazine-desisopropyl     | 107 | 8.28  | 95  | 3.87  |
| Azaconazole               | 89  | 9.06  | 94  | 4.76  |
| Azamethiphos              | 86  | 7.78  | 98  | 3.37  |
| Azinphos-ethyl            | 103 | 14.07 | 88  | 6.72  |
| Azinphos-methyl           | 94  | 11.55 | 90  | 11.77 |
| Aziprotryne               | 83  | 11.90 | 94  | 3.20  |
| Azoxystrobin              | 89  | 8.68  | 89  | 1.78  |
| Benalaxyl                 | 99  | 4.82  | 96  | 4.00  |
| Bendiocarb                | 102 | 9.15  | 95  | 2.13  |
| Benflutamid               | 84  | 9.78  | 90  | 3.14  |
| Bensulfuron-metil         | 103 | 7.57  | 91  | 2.81  |
| Benthiavalicarb-isopropyl | 90  | 11.47 | 92  | 2.35  |
| Benzolypop-ethyl          | 103 | 4.24  | 97  | 3.13  |
| Benzoximate               | 84  | 4.55  | 84  | 3.63  |
| Benzthiazuron             | 97  | 7.97  | 78  | 4.31  |
| Bifenazate                | 90  | 12.25 | 109 | 5.08  |
| Bitertanol                | 100 | 8.46  | 92  | 2.80  |
| Boscalid                  | 97  | 10.35 | 93  | 10.54 |
| Bromucanozole-Isomer      | 102 | 15.18 | 84  | 4.55  |
| Bupirimate                | 95  | 5.38  | 94  | 2.73  |

|                        |     |       |     |       |
|------------------------|-----|-------|-----|-------|
| Buprofezin             | 85  | 9.43  | 70  | 3.94  |
| Butafenacil            | 106 | 4.74  | 95  | 3.22  |
| Butocarboxim-sulfoxide | 77  | 14.96 | 87  | 2.24  |
| Butoxycarboxim         | 88  | 14.04 | 68  | 2.17  |
| Buturon                | 96  | 16.82 | 96  | 3.37  |
| Cadusafos              | 89  | 5.92  | 95  | 1.75  |
| Carbaryl               | 84  | 12.42 | 66  | 3.53  |
| Carbendazim            | 93  | 7.98  | 100 | 3.49  |
| Carbetamide            | 103 | 6.17  | 116 | 3.54  |
| Carbofuran             | 97  | 3.39  | 108 | 1.62  |
| Carboxin               | 97  | 5.42  | 101 | 1.73  |
| Carfentrazon           | 107 | 6.24  | 94  | 3.75  |
| Carfentrazone-ethyl    | 101 | 13.79 | 61  | 3.25  |
| Chlorantraniliprole    | 116 | 6.07  | 101 | 3.01  |
| Chlorbromuron          | 71  | 15.37 | 86  | 4.81  |
| Chlorfenvinphos        | 100 | 7.59  | 78  | 2.61  |
| Chlorfluazuron         | 104 | 8.60  | 74  | 4.95  |
| Chloridazon            | 104 | 12.22 | 105 | 2.85  |
| Chlorotoluron          | 107 | 6.00  | 105 | 3.67  |
| Chloroxuron            | 112 | 6.40  | 95  | 3.06  |
| Chlorpyrifos           | 117 | 15.61 | 107 | 8.78  |
| Chlorpyrifos-methyl    | 107 | 18.90 | 85  | 12.47 |
| Chlorsulfuron          | 91  | 13.22 | 96  | 2.44  |
| Chromafenozide         | 99  | 7.75  | 98  | 2.62  |
| Cinosulfuron           | 100 | 5.65  | 95  | 1.87  |
| Cirimidine             | 109 | 9.27  | 89  | 3.62  |
| Clethodim-Isomer       | 99  | 13.17 | 83  | 4.30  |
| Clomazone              | 100 | 5.19  | 90  | 1.60  |
| Cloquintocet-mexyl     | 108 | 5.74  | 78  | 3.14  |

|                          |     |       |     |      |
|--------------------------|-----|-------|-----|------|
| Clothianidin             | 105 | 13.49 | 110 | 4.41 |
| Coumaphos                | 97  | 9.27  | 77  | 2.29 |
| Crufomat(Ruelene)        | 88  | 11.42 | 83  | 2.96 |
| Cyanazine                | 117 | 8.50  | 98  | 4.24 |
| Cyazofamid               | 105 | 6.79  | 83  | 3.79 |
| Cybutrine                | 100 | 4.29  | 99  | 1.71 |
| Cyflufenamid             | 102 | 7.16  | 95  | 2.13 |
| Cymiazole                | 117 | 3.56  | 95  | 4.86 |
| Cymoxanil                | 90  | 19.12 | 93  | 4.77 |
| Cyproconazole-Isomer     | 79  | 15.46 | 97  | 3.87 |
| Cyprodinil               | 110 | 10.89 | 68  | 4.99 |
| Cyromazine               | 94  | 11.24 | 102 | 2.45 |
| Demeton-S                | 106 | 13.38 | 120 | 7.25 |
| Demeton-S-methylsulphone | 101 | 3.22  | 99  | 1.19 |
| Demeton-S-sulfoxide      | 101 | 5.37  | 100 | 2.64 |
| Desmedipham              | 114 | 5.66  | 105 | 2.70 |
| Desmetryn                | 111 | 5.86  | 92  | 2.01 |
| Diazinon                 | 90  | 7.66  | 104 | 4.09 |
| Diclobutrazol            | 95  | 8.42  | 99  | 5.30 |
| Dicrotophos              | 94  | 14.33 | 69  | 1.61 |
| Diethofencarb            | 98  | 7.29  | 106 | 2.61 |
| Difenoconazole-Isomer    | 111 | 6.70  | 82  | 2.66 |
| Difenoxyuron             | 96  | 9.21  | 96  | 2.43 |
| Diflubenzuron            | 104 | 10.05 | 85  | 2.57 |
| Diiflufenican            | 95  | 5.86  | 80  | 2.80 |
| Dimefox                  | 95  | 7.52  | 77  | 2.63 |
| Dimefuron                | 76  | 18.20 | 72  | 2.11 |
| Dimethachlor             | 104 | 11.47 | 88  | 5.44 |
| Dimethenamid             | 109 | 4.00  | 94  | 2.05 |



|                        |     |       |     |      |
|------------------------|-----|-------|-----|------|
| Dimethirimol           | 101 | 4.92  | 92  | 2.96 |
| Dimethoate             | 107 | 4.19  | 100 | 2.04 |
| Dimethomorph-Isomer    | 106 | 15.90 | 85  | 4.70 |
| Dimoxystrobin          | 113 | 4.19  | 99  | 3.35 |
| Diniconazole           | 111 | 6.04  | 95  | 4.34 |
| Dioxacarb              | 101 | 8.21  | 109 | 2.11 |
| Diphenamid             | 104 | 4.12  | 91  | 1.98 |
| Dipropetryn            | 95  | 7.77  | 94  | 3.04 |
| Diuron                 | 92  | 6.50  | 95  | 2.22 |
| Dodemorph              | 119 | 19.16 | 89  | 3.62 |
| Emamectin-benzoate b1a | 102 | 9.40  | 97  | 2.65 |
| Epoxiconazole          | 100 | 5.55  | 87  | 4.44 |
| Etaconazole-Isomer     | 95  | 7.06  | 96  | 3.64 |
| Ethidimuron            | 111 | 6.83  | 105 | 2.51 |
| Ethiofencarb           | 102 | 7.78  | 104 | 2.66 |
| Ethiofencarb-sulfone   | 117 | 7.80  | 112 | 2.26 |
| Ethiofencarb-sulfoxide | 97  | 10.55 | 116 | 3.46 |
| Ethion                 | 90  | 16.44 | 95  | 7.35 |
| Ethiprole              | 118 | 4.91  | 70  | 3.09 |
| Ethirimol              | 100 | 6.24  | 91  | 1.87 |
| Ethoprophos            | 95  | 7.83  | 80  | 3.50 |
| Etoxazole              | 95  | 6.79  | 91  | 2.15 |
| Etrimfos               | 107 | 9.04  | 79  | 2.90 |
| Fenamidone             | 93  | 7.13  | 98  | 3.27 |
| Fenamiphos             | 105 | 6.72  | 79  | 4.88 |
| Fenamiphos-sulfone     | 94  | 11.93 | 67  | 5.90 |
| Fenamiphos-sulfoxide   | 96  | 16.90 | 74  | 6.79 |
| Fenarimol              | 106 | 11.29 | 89  | 5.59 |
| Fenbuconazole          | 99  | 12.72 | 80  | 2.26 |

|                       |     |       |     |       |
|-----------------------|-----|-------|-----|-------|
| Fenfuram              | 109 | 8.14  | 97  | 2.70  |
| Fenhexamid            | 113 | 12.98 | 97  | 3.32  |
| Fenobucarb            | 89  | 11.61 | 83  | 3.52  |
| Fenoxycarb            | 92  | 10.83 | 80  | 4.94  |
| Fenpropimorph         | 111 | 9.39  | 105 | 5.31  |
| Fensulfothion         | 93  | 12.89 | 75  | 4.14  |
| Fensulfothion-oxon    | 107 | 10.59 | 79  | 2.88  |
| Fensulfothion-sulfone | 101 | 7.92  | 78  | 4.42  |
| Fenthion-sulfoxid     | 100 | 11.01 | 79  | 3.39  |
| Fenuron               | 90  | 16.96 | 100 | 2.60  |
| Flamprop-isopropyl    | 117 | 9.62  | 101 | 3.01  |
| Flamprop-methyl       | 101 | 14.04 | 100 | 5.40  |
| Flazasulfuron         | 101 | 2.39  | 96  | 3.06  |
| Flonicamid            | 102 | 6.77  | 77  | 3.35  |
| Florasulam            | 78  | 13.91 | 89  | 1.77  |
| Fluazuron             | 107 | 8.05  | 75  | 4.82  |
| Flubendiamide         | 113 | 13.62 | 86  | 12.05 |
| Flufenacet            | 110 | 6.74  | 104 | 6.28  |
| Flufenoxuron          | 96  | 12.03 | 95  | 3.92  |
| Fluometuron           | 97  | 7.79  | 95  | 2.41  |
| Fluopicolide          | 116 | 8.56  | 95  | 2.78  |
| Fluopyram             | 97  | 11.53 | 112 | 8.06  |
| Fluoxastrobin         | 101 | 8.04  | 77  | 2.53  |
| Fluquinconazole       | 99  | 20.00 | 109 | 7.22  |
| Fluridone             | 108 | 4.55  | 91  | 2.56  |
| Flusilazole           | 102 | 7.41  | 97  | 2.88  |
| Flutolanil            | 104 | 5.85  | 94  | 2.17  |
| Flutriafol            | 91  | 16.55 | 102 | 4.10  |
| Fluxapyroxad          | 102 | 7.14  | 109 | 3.29  |

|                         |     |       |     |      |
|-------------------------|-----|-------|-----|------|
| Fonofos                 | 104 | 12.62 | 75  | 6.54 |
| Foramsulfuron           | 104 | 3.87  | 97  | 1.83 |
| Forchlorfenuron         | 108 | 6.34  | 102 | 2.50 |
| Formetanate HCl         | 109 | 4.78  | 97  | 2.19 |
| Fosthiazat              | 112 | 7.95  | 113 | 1.93 |
| Fuberidazole            | 100 | 7.58  | 97  | 1.53 |
| Furalaxyl               | 94  | 7.20  | 97  | 2.05 |
| Furathiocarb            | 101 | 5.30  | 72  | 2.45 |
| Halofenozide            | 97  | 19.76 | 99  | 9.03 |
| Haloxypop-2-ethoxyethyl | 104 | 6.05  | 76  | 3.10 |
| Haloxypop-P-methyl      | 92  | 11.34 | 89  | 1.81 |
| Heptenophos             | 98  | 11.19 | 76  | 9.26 |
| Hexaconazole            | 113 | 10.20 | 100 | 3.49 |
| Hexaflumuron            | 108 | 16.71 | 88  | 9.13 |
| Hexazonon(Velpar)       | 101 | 7.32  | 107 | 2.86 |
| Hydramethylnon          | 102 | 6.26  | 97  | 2.69 |
| Hydroxycarbofuran       | 99  | 10.79 | 98  | 2.81 |
| Imazalil                | 109 | 9.14  | 83  | 4.07 |
| Imazaquin               | 92  | 13.33 | 96  | 4.04 |
| Imidacloprid            | 80  | 14.90 | 100 | 3.78 |
| Indoxacarb              | 90  | 11.27 | 73  | 5.02 |
| Ipconazole              | 89  | 4.34  | 96  | 2.12 |
| Iprobenfos              | 100 | 6.59  | 99  | 2.20 |
| Iprovalicarb            | 103 | 8.06  | 97  | 3.81 |
| Isocarbamide            | 101 | 11.82 | 102 | 3.21 |
| Isofenphos              | 106 | 10.41 | 100 | 5.66 |
| Isofenphos-methyl       | 93  | 16.33 | 88  | 8.19 |
| Isoprocab               | 98  | 10.79 | 82  | 1.89 |
| Isoprothiolane          | 113 | 8.76  | 94  | 1.84 |

|                    |     |       |     |       |
|--------------------|-----|-------|-----|-------|
| Isoproturon        | 105 | 5.55  | 97  | 1.72  |
| Isoxaflutole       | 104 | 10.70 | 78  | 5.60  |
| Isoxathion         | 111 | 14.36 | 99  | 4.59  |
| Ivermectin         | 105 | 10.80 | 85  | 8.81  |
| izoxaben           | 105 | 6.84  | 96  | 2.64  |
| Kresoxim-methyl    | 104 | 18.49 | 90  | 6.60  |
| Lenacil            | 93  | 8.57  | 90  | 2.26  |
| Lufenuron          | 83  | 13.76 | 98  | 5.35  |
| Malaoxon           | 107 | 3.13  | 102 | 3.99  |
| Malathion          | 101 | 16.77 | 109 | 11.23 |
| Mandipropamid      | 110 | 6.32  | 98  | 4.64  |
| Mecarbam           | 95  | 11.13 | 94  | 4.67  |
| Mefenacet          | 97  | 4.42  | 73  | 4.37  |
| Mepanipyrim        | 107 | 15.09 | 80  | 3.93  |
| Mephosfolan        | 97  | 4.10  | 101 | 3.37  |
| Mepronil           | 107 | 2.14  | 96  | 1.80  |
| Mesotrione         | 104 | 8.92  | 70  | 2.19  |
| Metaflumizone      | 105 | 16.87 | 77  | 5.75  |
| Metalaxyl          | 102 | 8.51  | 110 | 7.27  |
| Metamitron         | 105 | 16.07 | 93  | 3.76  |
| Metazachlor        | 109 | 6.03  | 104 | 3.94  |
| Metconazole        | 107 | 3.71  | 101 | 2.75  |
| Methabenzthiazuron | 112 | 3.53  | 91  | 1.87  |
| Methamidophos      | 102 | 9.66  | 106 | 2.72  |
| Methidathion       | 85  | 19.55 | 100 | 3.52  |
| Methiocarb         | 95  | 8.91  | 78  | 2.88  |
| Methiocarb-sulfone | 98  | 12.48 | 81  | 3.99  |
| Methomyl           | 101 | 9.83  | 110 | 3.06  |
| Methoprotryne      | 106 | 7.72  | 93  | 2.56  |

|                    |     |       |     |      |
|--------------------|-----|-------|-----|------|
| Methoxyfenozide    | 109 | 2.96  | 99  | 5.44 |
| Metobromuron       | 113 | 11.29 | 92  | 2.58 |
| Metolachlor        | 108 | 4.72  | 96  | 3.40 |
| Metolcarb          | 120 | 7.30  | 88  | 6.37 |
| Metosulam          | 91  | 9.16  | 97  | 4.83 |
| Metoxuron          | 100 | 4.99  | 93  | 1.81 |
| Metrafenon         | 103 | 6.12  | 76  | 2.96 |
| Metsulfuron-methyl | 100 | 5.38  | 100 | 5.38 |
| Mevinphos-Isomer   | 112 | 11.34 | 114 | 3.71 |
| Mexacarbate        | 107 | 4.33  | 93  | 2.00 |
| Molinate           | 93  | 16.79 | 93  | 6.27 |
| Monocrotophos      | 93  | 12.24 | 70  | 2.32 |
| Monolinuron        | 117 | 8.79  | 96  | 2.90 |
| Moxidectin         | 113 | 8.73  | 96  | 4.69 |
| Myclobutanil       | 107 | 6.61  | 90  | 4.33 |
| Napropamide        | 105 | 6.57  | 105 | 2.94 |
| Neburon            | 101 | 5.10  | 94  | 2.62 |
| Nitenpyram         | 102 | 8.57  | 98  | 2.97 |
| Nitralin           | 108 | 10.72 | 85  | 4.64 |
| Norflurazon        | 104 | 5.78  | 96  | 5.44 |
| Novaluron          | 100 | 8.62  | 103 | 5.22 |
| Nuarimol           | 108 | 7.71  | 94  | 5.80 |
| Omethoate          | 88  | 3.24  | 103 | 2.14 |
| Oxadiazon          | 83  | 18.74 | 72  | 3.31 |
| Oxadixyl           | 113 | 10.53 | 95  | 3.64 |
| Oxamyl             | 104 | 9.31  | 103 | 2.63 |
| Oxamyl-oxime       | 92  | 4.33  | 99  | 3.22 |
| Oxydemeton-methyl  | 93  | 2.70  | 107 | 0.90 |
| Paclobutrazol      | 98  | 5.48  | 95  | 3.06 |

|                               |     |       |     |      |
|-------------------------------|-----|-------|-----|------|
| Paraoxon                      | 87  | 9.57  | 70  | 3.52 |
| Paraoxon-ethyl                | 94  | 12.43 | 70  | 2.32 |
| Penconazole                   | 91  | 13.21 | 93  | 2.51 |
| Penthiopyrad                  | 103 | 3.61  | 107 | 4.13 |
| Pethoxamid                    | 104 | 6.88  | 87  | 1.53 |
| Phenmedipham                  | 93  | 18.72 | 60  | 3.25 |
| Phenthoate                    | 98  | 15.17 | 93  | 3.48 |
| Phorate-sulfone               | 98  | 17.07 | 90  | 5.48 |
| Phorate-sulfoxide             | 113 | 16.07 | 110 | 3.34 |
| Phosalone                     | 80  | 17.43 | 89  | 2.31 |
| Phosmet                       | 95  | 10.12 | 97  | 7.05 |
| Phosphamidon                  | 106 | 5.89  | 79  | 2.23 |
| Phoxim                        | 111 | 9.05  | 100 | 3.86 |
| Picoxystrobin                 | 105 | 6.32  | 92  | 2.70 |
| Pinoxaden                     | 106 | 2.72  | 97  | 3.04 |
| Piperonyl-butoxide            | 99  | 5.45  | 94  | 3.13 |
| Piperophos                    | 107 | 3.09  | 83  | 2.58 |
| Pirimicarb                    | 104 | 4.70  | 94  | 2.45 |
| Pirimicarb-desmethyl          | 103 | 3.19  | 98  | 2.09 |
| Pirimiphos-ethyl              | 106 | 5.56  | 86  | 2.51 |
| Pirimiphos-methyl             | 102 | 5.86  | 79  | 3.52 |
| Pirimisulfuron-metil          | 108 | 6.44  | 96  | 3.75 |
| Prochloraz                    | 113 | 5.01  | 95  | 2.58 |
| Prochloraz-desimidazole-amino | 90  | 7.57  | 100 | 4.57 |
| Promecarb                     | 102 | 5.03  | 82  | 2.01 |
| Prometon                      | 105 | 3.44  | 92  | 1.12 |
| Prometryne                    | 106 | 2.83  | 92  | 1.55 |
| Propachlor                    | 92  | 6.82  | 96  | 2.58 |
| Propamocarb                   | 101 | 3.41  | 97  | 2.43 |

|                     |     |       |     |      |
|---------------------|-----|-------|-----|------|
| Propanil            | 88  | 9.58  | 81  | 6.28 |
| Propargite          | 101 | 4.94  | 120 | 3.95 |
| Propetamphos        | 105 | 10.92 | 85  | 3.92 |
| Propiconazole       | 96  | 10.62 | 93  | 3.07 |
| Propoxur            | 108 | 8.66  | 112 | 1.42 |
| Propyzamide         | 114 | 9.17  | 96  | 4.94 |
| Prosulfocarb        | 93  | 6.60  | 88  | 3.15 |
| Pymetrozine         | 99  | 3.49  | 98  | 1.45 |
| Pyracarbolid        | 92  | 6.41  | 93  | 3.33 |
| Pyraclostrobin      | 96  | 6.71  | 108 | 5.85 |
| Pyraflufen-ethyl    | 96  | 9.30  | 77  | 3.39 |
| Pyrazophos          | 95  | 5.96  | 95  | 3.83 |
| Pyridafol           | 111 | 6.96  | 96  | 2.51 |
| Pyridaphenthion     | 82  | 7.36  | 91  | 2.59 |
| Pyrifenox           | 105 | 5.70  | 90  | 2.79 |
| Pyrimethanil        | 96  | 10.59 | 93  | 8.05 |
| Pyroquilon          | 91  | 8.57  | 83  | 4.50 |
| Quinalphos          | 94  | 19.25 | 79  | 2.16 |
| Sebuthylazin        | 102 | 6.36  | 93  | 4.47 |
| Secbumeton          | 106 | 3.39  | 93  | 2.09 |
| Silthiofam          | 103 | 6.80  | 92  | 3.52 |
| Simazine            | 106 | 14.91 | 96  | 3.98 |
| Simetryn            | 102 | 4.15  | 93  | 2.68 |
| Spinetoram          | 95  | 10.77 | 110 | 4.44 |
| Spiromesifen        | 100 | 13.57 | 78  | 5.95 |
| Spirotetramat       | 118 | 7.72  | 99  | 4.69 |
| Spiroxamine-Isomer  | 97  | 4.70  | 97  | 2.51 |
| Sulfometuron-methyl | 102 | 3.86  | 90  | 3.06 |
| Sulfosulfuron       | 93  | 11.97 | 104 | 3.31 |

|                         |     |       |     |      |
|-------------------------|-----|-------|-----|------|
| Tebuconazole            | 91  | 7.04  | 103 | 2.88 |
| Tebufenozide            | 104 | 5.73  | 100 | 4.79 |
| Tebufenpyrad            | 95  | 6.48  | 77  | 4.67 |
| Tebutam                 | 105 | 6.69  | 92  | 1.45 |
| Tebuthiuron             | 100 | 4.34  | 95  | 2.38 |
| Terbufos-sulfoxide      | 107 | 13.32 | 114 | 2.49 |
| Terbumeton              | 101 | 4.15  | 94  | 1.46 |
| Terbuthylazine-desethyl | 90  | 9.12  | 92  | 2.10 |
| Terbutryn               | 97  | 3.52  | 95  | 2.10 |
| Tetrachlorvinphos       | 110 | 14.09 | 70  | 6.60 |
| Tetraconazole           | 105 | 9.83  | 90  | 2.80 |
| Thiabendazole           | 103 | 3.23  | 100 | 2.29 |
| Thiacloprid             | 99  | 5.14  | 92  | 2.32 |
| Thiamethoxam            | 101 | 4.89  | 102 | 2.43 |
| Thidiazuron             | 103 | 9.31  | 101 | 3.57 |
| Thifensulfuron-methyl   | 100 | 4.04  | 97  | 2.40 |
| Thiodicarb              | 102 | 7.35  | 101 | 3.57 |
| Thiofanox-sulfoxide     | 90  | 13.33 | 104 | 3.65 |
| Thiophanate             | 114 | 6.21  | 89  | 3.71 |
| Thiophanate-methyl      | 101 | 10.28 | 96  | 3.59 |
| Tralkoxydim             | 102 | 12.55 | 78  | 3.52 |
| Triadimefon             | 106 | 7.19  | 92  | 3.29 |
| Triadimenol             | 112 | 8.64  | 99  | 4.26 |
| Triasulforon            | 88  | 14.47 | 96  | 3.04 |
| Triazophos              | 103 | 3.74  | 86  | 3.16 |
| Tricyclazole            | 99  | 4.66  | 97  | 3.52 |
| Trietazin               | 114 | 5.77  | 94  | 4.19 |
| Trifloxystrobin         | 100 | 5.06  | 74  | 3.41 |
| Triflumizole            | 91  | 6.12  | 99  | 3.69 |



|                                 |     |      |     |       |
|---------------------------------|-----|------|-----|-------|
| Triflumuron                     | 103 | 7.31 | 94  | 3.36  |
| Triflusulfuron-methyl           | 97  | 3.74 | 94  | 3.13  |
| Trimethylphenyl-methylcarbamate | 99  | 9.72 | 85  | 12.63 |
| Triticonazole                   | 112 | 4.55 | 101 | 3.20  |
| Vamidothion                     | 104 | 2.92 | 107 | 2.45  |
| Vamidothion-sulfoxide           | 103 | 7.12 | 102 | 2.25  |
| Zoxamide                        | 111 | 3.94 | 96  | 4.24  |

**Table S3:** Recovery% and precision (RSD%) in groundwater at 10 ng/L spiking level using automated SPE enrichment.

| Compounds            | Recovery% (10 ng/L) | RSD% (10 ng/L) |
|----------------------|---------------------|----------------|
| (Monceren)Pencycuron | 103.6               | 9.0            |
| 3-Hydroxycarbofuran  | 106.0               | 5.1            |
| Acephate             | 119.6               | 14.7           |
| Acetamiprid          | 93.6                | 2.8            |
| Acibenzolar-S-methyl | 95.6                | 15.6           |
| Aldicarb             | 107.2               | 19.1           |
| Aldicarb-sulfone     | 114.3               | 6.2            |
| Aldicarb-sulfoxide   | 117.5               | 5.4            |

|                           |       |      |
|---------------------------|-------|------|
| Ametoctradin              | 96.6  | 6.7  |
| Ametryn                   | 105.6 | 7.2  |
| Amidosulfuron             | 95.7  | 5.4  |
| Aminocarb                 | 106.3 | 9.9  |
| Amitraz                   | 117.8 | 18.6 |
| Anilofos                  | 106.3 | 7.1  |
| Atrazine                  | 106.9 | 7.6  |
| Atrazine-desethyl         | 119.9 | 9.3  |
| Atrazine-desisopropyl     | 96.4  | 15.2 |
| Azaconazole               | 120.0 | 7.9  |
| Azamethiphos              | 115.0 | 8.3  |
| Azinphos-ethyl            | 117.1 | 12.3 |
| Azinphos-methyl           | 118.2 | 13.0 |
| Aziprotryne               | 100.4 | 8.6  |
| Azoxystrobin              | 119.8 | 11.0 |
| Benalaxyl                 | 105.3 | 7.6  |
| Bendiocarb                | 108.8 | 8.6  |
| Benflutamid               | 104.9 | 8.0  |
| Bensulfuron-metil         | 114.3 | 8.1  |
| Benthiavalicarb-isopropyl | 106.0 | 10.9 |
| Benzolyprop-ethyl         | 105.3 | 7.7  |
| Benzoximate               | 107.5 | 11.7 |
| Benzthiazuron             | 102.3 | 9.9  |
| Bifenazate                | 118.2 | 8.4  |
| Bitertanol                | 102.0 | 10.5 |
| Boscalid                  | 112.9 | 9.2  |
| Bromucanazole-Isomer      | 110.9 | 13.3 |
| Bupirimate                | 106.0 | 5.6  |
| Buprofezin                | 93.1  | 10.2 |

|                        |       |      |
|------------------------|-------|------|
| Butafenacil            | 111.6 | 6.4  |
| Butocarboxim-sulfoxide | 117.5 | 10.7 |
| Butoxycarboxim         | 116.0 | 5.8  |
| Buturon                | 116.7 | 7.8  |
| Cadusafos              | 96.3  | 6.3  |
| Carbaryl               | 118.0 | 5.7  |
| Carbendazim            | 110.2 | 4.2  |
| Carbetamide            | 115.4 | 6.3  |
| Carbofuran             | 109.8 | 7.4  |
| Carboxin               | 112.9 | 8.8  |
| Carfentrazone          | 108.5 | 8.0  |
| Carfentrazone-ethyl    | 110.1 | 10.0 |
| Chlorantraniliprole    | 112.4 | 8.7  |
| Chlorbromuron          | 105.9 | 8.7  |
| Chlorfenvinphos        | 105.9 | 6.1  |
| Chlorfluazuron         | 103.4 | 16.1 |
| Chloridazon            | 118.0 | 4.5  |
| Chlorotoluron          | 93.6  | 3.2  |
| Chloroxuron            | 114.7 | 7.9  |
| Chlorpyrifos           | 82.5  | 19.9 |
| Chlorsulfuron          | 119.9 | 6.3  |
| Chromafenozide         | 109.9 | 7.0  |
| Cinosulfuron           | 102.4 | 6.9  |
| Cirimidine             | 94.7  | 9.2  |
| Clethodim-Isomer       | 119.3 | 19.7 |
| Clomazone              | 102.9 | 8.8  |
| Cloquintocet-mexyl     | 92.6  | 9.4  |
| Clothianidin           | 118.8 | 10.5 |
| Coumaphos              | 103.6 | 13.3 |

|                          |       |      |
|--------------------------|-------|------|
| Crufomat(Ruelene)        | 107.2 | 5.8  |
| Cyanazine                | 116.2 | 6.4  |
| Cyazofamid               | 104.9 | 6.6  |
| Cybutrine                | 100.9 | 11.6 |
| Cyflufenamid             | 100.2 | 10.1 |
| Cymiazole                | 75.5  | 17.1 |
| Cymoxanil                | 111.6 | 7.4  |
| Cyproconazole-Isomer     | 114.0 | 10.7 |
| Cyprodinil               | 119.9 | 19.0 |
| Cyromazine               | 119.8 | 15.5 |
| Demeton-S                | 108.7 | 9.9  |
| Demeton-S-methylsulphone | 95.2  | 5.6  |
| Demeton-S-sulfoxide      | 100.7 | 7.1  |
| Desmedipham              | 108.5 | 6.1  |
| Desmetryn                | 107.1 | 6.7  |
| Diazinon                 | 96.0  | 5.3  |
| Diclobutrazol            | 104.5 | 11.4 |
| Dicrotophos              | 97.4  | 6.7  |
| Diethofencarb            | 106.7 | 7.7  |
| Difenoconazole-Isomer    | 98.9  | 13.3 |
| Difenoxuron              | 118.6 | 8.6  |
| Diflubenzuron            | 111.5 | 9.0  |
| Diflufenican             | 104.9 | 14.2 |
| Dimefox                  | 120.0 | 9.8  |
| Dimefuron                | 114.2 | 8.6  |
| Dimethachlor             | 104.0 | 8.3  |
| Dimethenamid             | 111.1 | 8.8  |
| Dimethirimol             | 117.8 | 7.8  |
| Dimethoate               | 99.6  | 4.4  |

|                        |       |      |
|------------------------|-------|------|
| Dimethomorph-Isomer    | 104.5 | 12.7 |
| Dimoxystrobin          | 107.0 | 8.0  |
| Diniconazole           | 110.8 | 12.7 |
| Dioxacarb              | 105.5 | 5.7  |
| Diphenamid             | 108.6 | 7.9  |
| Dipropetryn            | 105.7 | 7.7  |
| Diuron                 | 112.3 | 5.2  |
| Dodemorph              | 91.3  | 5.0  |
| Emamectin-benzoate b1a | 91.4  | 12.7 |
| Epoxiconazole          | 110.5 | 6.6  |
| Etaconazole-Isomer     | 109.4 | 11.5 |
| Ethidimuron            | 116.0 | 6.8  |
| Ethiofencarb           | 118.8 | 13.7 |
| Ethiofencarb-sulfone   | 97.6  | 6.4  |
| Ethiofencarb-sulfoxide | 98.6  | 7.6  |
| Ethion                 | 83.7  | 17.7 |
| Ethiprole              | 113.5 | 7.7  |
| Ethirimol              | 112.2 | 7.2  |
| Ethoprophos            | 101.6 | 10.0 |
| Etoxazole              | 93.0  | 14.1 |
| Etrimfos               | 91.0  | 6.2  |
| Fenamidone             | 119.9 | 5.2  |
| Fenamiphos             | 119.9 | 7.9  |
| Fenamiphos-sulfone     | 117.6 | 7.0  |
| Fenamiphos-sulfoxide   | 104.1 | 7.8  |
| Fenarimol              | 112.3 | 7.6  |
| Fenbuconazole          | 106.0 | 9.0  |
| Fenfuram               | 110.1 | 10.1 |
| Fenhexamid             | 111.0 | 7.3  |

|                       |       |      |
|-----------------------|-------|------|
| Fenobucarb            | 101.4 | 8.1  |
| Fenoxycarb            | 108.2 | 10.6 |
| Fenpropimorph         | 92.6  | 6.2  |
| Fensulfothion         | 112.6 | 9.0  |
| Fensulfothion-oxon    | 109.1 | 6.4  |
| Fensulfothion-sulfone | 112.1 | 5.7  |
| Fenthion-sulfoxid     | 112.3 | 7.5  |
| Fenuron               | 102.2 | 6.4  |
| Flamprop-isopropyl    | 106.8 | 10.5 |
| Flamprop-methyl       | 110.0 | 9.7  |
| Flazasulfuron         | 108.9 | 5.1  |
| Flonicamid            | 108.6 | 9.0  |
| Florasulam            | 118.4 | 5.7  |
| Fluazuron             | 91.2  | 17.2 |
| Flubendiamide         | 117.1 | 19.9 |
| Flufenacet            | 108.0 | 8.4  |
| Flufenoxuron          | 94.9  | 14.4 |
| Fluometuron           | 108.8 | 7.4  |
| Fluopicolide          | 108.3 | 7.5  |
| Flupyram              | 106.7 | 8.1  |
| Fluoxastrobin         | 107.6 | 9.7  |
| Fluquinconazole       | 97.2  | 8.7  |
| Fluridone             | 105.2 | 7.9  |
| Flusilazole           | 107.2 | 7.1  |
| Flutolanil            | 112.2 | 4.8  |
| Flutriafol            | 118.3 | 8.3  |
| Fluxapyroxad          | 113.5 | 6.7  |
| Fonofos               | 96.2  | 9.1  |
| Foramsulfuron         | 104.4 | 6.2  |

|                         |       |      |
|-------------------------|-------|------|
| Forchlorfenuron         | 116.6 | 5.7  |
| Formetanate HCl         | 119.9 | 13.8 |
| Fosthiazat              | 105.4 | 8.8  |
| Fuberidazole            | 112.9 | 6.7  |
| Furalaxyl               | 112.0 | 8.0  |
| Furathiocarb            | 93.5  | 10.0 |
| Halofenozide            | 118.3 | 16.1 |
| Haloxypop-2-ethoxyethyl | 91.5  | 8.6  |
| Haloxypop-P-methyl      | 100.7 | 7.7  |
| Heptenophos             | 105.3 | 9.9  |
| Hexaconazole            | 103.0 | 8.3  |
| Hexaflumuron            | 105.7 | 18.3 |
| Hexazonon(Velpar)       | 109.7 | 6.4  |
| Hydramethylnon          | 101.3 | 18.2 |
| Hydroxycarbofuran       | 106.7 | 5.4  |
| Imazalil                | 100.7 | 6.5  |
| Imazaquin               | 99.1  | 6.3  |
| Imidacloprid            | 98.7  | 3.9  |
| Indoxacarb              | 95.3  | 11.3 |
| Ipconazole              | 96.7  | 9.6  |
| Iprobenfos              | 98.9  | 8.7  |
| Iprovalicarb            | 107.2 | 7.8  |
| Isocarbamide            | 118.0 | 16.0 |
| Isofenphos              | 114.5 | 11.4 |
| Isofenphos-methyl       | 115.6 | 19.7 |
| Isoprocab               | 102.5 | 10.0 |
| Isoprothiolane          | 109.1 | 7.6  |
| Isoproturon             | 110.5 | 7.6  |
| Isoxaflutole            | 118.1 | 10.7 |

|                    |       |      |
|--------------------|-------|------|
| Isoxathion         | 99.3  | 13.2 |
| Ivermectin         | 96.4  | 16.2 |
| izoxaben           | 101.9 | 6.4  |
| Kresoxim-methyl    | 109.3 | 9.8  |
| Lufenuron          | 98.0  | 10.2 |
| Malaoxon           | 109.4 | 9.1  |
| Malathion          | 92.3  | 10.9 |
| Mandipropamid      | 106.8 | 7.9  |
| Mecarbam           | 104.2 | 12.5 |
| Mefenacet          | 108.3 | 10.2 |
| Mepanipyrim        | 108.6 | 11.7 |
| Mephosfolan        | 104.2 | 8.4  |
| Mepronil           | 111.4 | 7.4  |
| Mesotrione         | 90.3  | 4.6  |
| Metaflumizone      | 97.2  | 14.3 |
| Metalaxyl          | 113.5 | 9.7  |
| Metamitron         | 109.5 | 6.5  |
| Metazachlor        | 111.1 | 8.1  |
| Metconazole        | 106.9 | 9.1  |
| Methabenzthiazuron | 110.0 | 8.0  |
| Methamidophos      | 118.5 | 18.0 |
| Methidathion       | 109.7 | 8.1  |
| Methiocarb         | 109.3 | 7.0  |
| Methiocarb-sulfone | 115.3 | 5.7  |
| Methomyl           | 120.0 | 7.9  |
| Methoprotryne      | 108.8 | 6.1  |
| Methoxyfenozide    | 114.6 | 5.8  |
| Metobromuron       | 104.7 | 7.5  |
| Metolachlor        | 103.8 | 8.3  |



|                    |       |      |
|--------------------|-------|------|
| Metolcarb          | 104.3 | 15.9 |
| Metosulam          | 110.2 | 6.3  |
| Metoxuron          | 113.4 | 8.1  |
| Metrafenon         | 102.2 | 8.4  |
| Metsulfuron-methyl | 105.9 | 7.2  |
| Mevinphos-Isomer   | 98.6  | 11.9 |
| Mexacarbate        | 104.6 | 8.3  |
| Molinate           | 102.2 | 19.9 |
| Monocrotophos      | 108.9 | 5.5  |
| Monolinuron        | 102.9 | 7.4  |
| Moxidectin         | 100.7 | 19.7 |
| Myclobutanil       | 107.3 | 7.5  |
| Napropamide        | 92.0  | 8.0  |
| Neburon            | 108.2 | 6.5  |
| Nitenpyram         | 90.5  | 6.1  |
| Nitralin           | 105.9 | 14.4 |
| Norflurazon        | 116.9 | 8.6  |
| Novaluron          | 99.1  | 11.4 |
| Nuarimol           | 108.5 | 8.9  |
| Omethoate          | 117.5 | 6.3  |
| Oxadiazon          | 92.2  | 8.8  |
| Oxadixyl           | 108.0 | 8.2  |
| Oxamyl             | 104.0 | 8.9  |
| Oxamyl-oxime       | 119.5 | 19.8 |
| Oxydemeton-methyl  | 105.9 | 6.7  |
| Paclobutrazol      | 113.0 | 8.3  |
| Paraoxon           | 115.2 | 6.7  |
| Paraoxon-ethyl     | 118.0 | 8.4  |
| Penconazole        | 104.9 | 5.5  |

|                               |       |      |
|-------------------------------|-------|------|
| Penthiopyrad                  | 112.5 | 7.9  |
| Pethoxamid                    | 103.1 | 8.6  |
| Phenmedipham                  | 113.3 | 5.9  |
| Phenthoate                    | 113.0 | 9.0  |
| Phorate-sulfone               | 113.2 | 11.3 |
| Phorate-sulfoxide             | 112.6 | 7.5  |
| Phosalone                     | 104.2 | 15.1 |
| Phosmet                       | 115.8 | 10.9 |
| Phosphamidon                  | 98.7  | 6.1  |
| Phoxim                        | 96.6  | 8.8  |
| Picoxystrobin                 | 102.9 | 6.6  |
| Pinoxaden                     | 102.8 | 7.3  |
| Piperonyl-butoxide            | 98.6  | 14.9 |
| Piperophos                    | 100.3 | 8.9  |
| Pirimicarb                    | 105.0 | 8.6  |
| Pirimicarb-desmethyl          | 109.1 | 4.9  |
| Pirimiphos-ethyl              | 89.7  | 7.4  |
| Pirimiphos-methyl             | 93.3  | 8.1  |
| Pirimisulfuron-metil          | 117.9 | 10.8 |
| Prochloraz                    | 100.2 | 9.3  |
| Prochloraz-desimidazole-amino | 109.9 | 10.4 |
| Promecarb                     | 101.6 | 8.1  |
| Prometon                      | 106.8 | 7.1  |
| Prometryne                    | 104.8 | 5.9  |
| Propachlor                    | 104.9 | 9.2  |
| Propamocarb                   | 103.8 | 18.7 |
| Propanil                      | 107.3 | 7.6  |
| Propargite                    | 86.4  | 17.9 |
| Propetamphos                  | 100.7 | 10.2 |

|                     |       |      |
|---------------------|-------|------|
| Propiconazole       | 118.4 | 11.6 |
| Propoxur            | 110.5 | 7.2  |
| Propyzamide         | 108.5 | 8.6  |
| Prosulfocarb        | 91.4  | 9.7  |
| Pymetrozine         | 117.8 | 5.3  |
| Pyracarbolid        | 108.4 | 6.4  |
| Pyraclostrobin      | 101.7 | 6.6  |
| Pyraflufen-ethyl    | 109.2 | 7.8  |
| Pyrazophos          | 99.0  | 14.5 |
| Pyridafol           | 100.0 | 4.2  |
| Pyridaphenthion     | 110.3 | 7.4  |
| Pyrifenox           | 101.8 | 7.5  |
| Pyrimethanil        | 92.3  | 7.2  |
| Pyroquilon          | 111.8 | 6.3  |
| Quinalphos          | 99.8  | 9.6  |
| Sebuthylazin        | 116.3 | 5.8  |
| Secbumeton          | 110.4 | 6.4  |
| Silthiofam          | 105.6 | 5.9  |
| Simazine            | 114.6 | 8.0  |
| Simetryn            | 109.6 | 6.6  |
| Spinetoram          | 93.1  | 11.6 |
| Spiromesifen        | 97.2  | 17.5 |
| Spirotetramat       | 119.2 | 9.1  |
| Spiroxamine-Isomer  | 97.0  | 8.0  |
| Sulfometuron-methyl | 103.8 | 9.7  |
| Sulfosulfuron       | 116.8 | 9.0  |
| Tebuconazole        | 108.5 | 6.3  |
| Tebufenozide        | 101.8 | 8.6  |
| Tebufenpyrad        | 96.1  | 8.4  |

|                                 |       |      |
|---------------------------------|-------|------|
| Tebutam                         | 98.9  | 12.9 |
| Tebuthiuron                     | 112.7 | 5.7  |
| Terbufos-sulfoxide              | 110.8 | 8.6  |
| Terbumeton                      | 108.4 | 7.5  |
| Terbuthylazine-desethyl         | 118.6 | 6.6  |
| Terbutryn                       | 110.0 | 9.2  |
| Tetrachlorvinphos               | 108.3 | 8.6  |
| Tetraconazole                   | 107.5 | 7.0  |
| Thiabendazole                   | 119.5 | 19.9 |
| Thiacloprid                     | 112.5 | 4.9  |
| Thiamethoxam                    | 118.8 | 18.8 |
| Thidiazuron                     | 119.9 | 7.9  |
| Thifensulfuron-methyl           | 103.0 | 7.0  |
| Thiodicarb                      | 101.7 | 9.3  |
| Thiofanox-sulfoxide             | 93.0  | 14.4 |
| Thiophanate                     | 115.6 | 8.9  |
| Thiophanate-methyl              | 119.5 | 17.9 |
| Tralkoxydim                     | 110.5 | 10.2 |
| Triadimefon                     | 109.1 | 8.2  |
| Triadimenol                     | 116.5 | 11.6 |
| Triasulfuron                    | 117.4 | 6.9  |
| Triazophos                      | 108.0 | 5.7  |
| Tricyclazole                    | 111.4 | 4.9  |
| Trietazin                       | 106.6 | 8.8  |
| Trifloxystrobin                 | 100.0 | 8.4  |
| Triflumizole                    | 101.9 | 8.7  |
| Triflumuron                     | 107.1 | 7.3  |
| Triflusulfuron-methyl           | 107.9 | 9.3  |
| Trimethylphenyl-methylcarbamate | 119.5 | 16.4 |

|                       |       |      |
|-----------------------|-------|------|
| Triticonazole         | 106.5 | 10.0 |
| Vamidothion           | 97.9  | 7.5  |
| Vamidothion-sulfoxide | 97.2  | 6.7  |
| Zoxamide              | 108.7 | 6.2  |

**Table S4:** Results of real sample analysis. Individual concentrations and sum concentrations including or excluding results under 10 ng/L. G: groundwater, nd: non-detected, S: surface water. Single analysis was carried out for each sample.

| Compounds            | G1 | S1 | S2 | S3    | S4 | S5 | S6 | S7 | S8 | S9   | S10 | S11  | S12 | S13 | S14 | S15 | S16 | S17 | S18  | S19 |
|----------------------|----|----|----|-------|----|----|----|----|----|------|-----|------|-----|-----|-----|-----|-----|-----|------|-----|
| (Monceren)Pencycuron | nd | nd | nd | nd    | nd | nd | nd | nd | nd | nd   | nd  | nd   | nd  | nd  | nd  | nd  | nd  | nd  | 1.44 | nd  |
| 3-Hydroxycarbofuran  | nd | nd | nd | nd    | nd | nd | nd | nd | nd | nd   | nd  | nd   | nd  | nd  | nd  | nd  | nd  | nd  | nd   | nd  |
| Acephate             | nd | nd | nd | nd    | nd | nd | nd | nd | nd | nd   | nd  | nd   | nd  | nd  | nd  | nd  | nd  | nd  | nd   | nd  |
| Acetamiprid          | nd | nd | nd | 20.50 | nd | nd | nd | nd | nd | 1.95 | nd  | 3.67 | nd  | nd  | nd  | nd  | nd  | nd  | 1.46 | nd  |

|                       |    |      |      |      |      |       |      |      |      |       |      |       |      |      |       |      |      |      |      |      |
|-----------------------|----|------|------|------|------|-------|------|------|------|-------|------|-------|------|------|-------|------|------|------|------|------|
| Acibenzolar-S-methyl  | nd | nd   | nd   | nd   | nd   | nd    | nd   | nd   | nd   | nd    | nd   | nd    | nd   | nd   | nd    | nd   | nd   | nd   | nd   | nd   |
| Aldicarb              | nd | nd   | nd   | nd   | nd   | nd    | nd   | nd   | nd   | nd    | nd   | nd    | nd   | nd   | nd    | nd   | nd   | nd   | nd   | nd   |
| Aldicarb-sulfone      | nd | nd   | nd   | nd   | nd   | nd    | nd   | nd   | nd   | nd    | nd   | nd    | nd   | nd   | nd    | nd   | nd   | nd   | nd   | nd   |
| Aldicarb-sulfoxide    | nd | nd   | nd   | nd   | nd   | nd    | nd   | nd   | nd   | nd    | nd   | nd    | nd   | nd   | nd    | nd   | nd   | nd   | nd   | nd   |
| Ametoctradin          | nd | nd   | nd   | nd   | nd   | nd    | nd   | nd   | nd   | nd    | nd   | nd    | nd   | nd   | nd    | nd   | nd   | nd   | nd   | nd   |
| Ametryn               | nd | nd   | nd   | nd   | nd   | nd    | nd   | nd   | nd   | nd    | nd   | nd    | nd   | nd   | nd    | nd   | nd   | nd   | 1.62 | nd   |
| Amidosulfuron         | nd | nd   | nd   | nd   | nd   | nd    | nd   | nd   | nd   | nd    | nd   | nd    | nd   | nd   | nd    | nd   | nd   | nd   | 1.36 | nd   |
| Aminocarb             | nd | nd   | nd   | nd   | nd   | nd    | nd   | nd   | nd   | nd    | nd   | nd    | nd   | nd   | nd    | nd   | nd   | nd   | 1.93 | nd   |
| Amitraz               | nd | nd   | nd   | nd   | nd   | nd    | nd   | nd   | nd   | nd    | nd   | nd    | nd   | nd   | nd    | nd   | nd   | nd   | nd   | nd   |
| Anilofos              | nd | nd   | nd   | nd   | nd   | nd    | nd   | nd   | nd   | nd    | nd   | nd    | nd   | nd   | nd    | nd   | nd   | nd   | 1.42 | nd   |
| Atrazine              | nd | 4.33 | 2.80 | 3.76 | 5.61 | 5.66  | 3.83 | 4.63 | 3.75 | 8.27  | 4.29 | 8.10  | 2.83 | 4.33 | 4.37  | 3.09 | 4.58 | 3.45 | 4.94 | 4.18 |
| Atrazine-desethyl     | nd | nd   | nd   | nd   | nd   | nd    | nd   | nd   | nd   | 31.10 | nd   | nd    | nd   | nd   | 31.94 | nd   | nd   | nd   | nd   | nd   |
| Atrazine-desisopropyl | nd | nd   | nd   | nd   | nd   | nd    | nd   | nd   | nd   | nd    | nd   | nd    | nd   | nd   | nd    | nd   | nd   | nd   | nd   | nd   |
| Azaconazole           | nd | nd   | nd   | nd   | nd   | nd    | nd   | nd   | nd   | nd    | nd   | nd    | nd   | nd   | nd    | nd   | nd   | nd   | 1.38 |      |
| Azamethiphos          | nd | nd   | nd   | nd   | nd   | nd    | nd   | nd   | nd   | nd    | nd   | nd    | nd   | nd   | nd    | nd   | nd   | nd   | nd   | nd   |
| Azinphos-ethyl        | nd | nd   | nd   | nd   | nd   | nd    | nd   | nd   | nd   | nd    | nd   | nd    | nd   | nd   | nd    | nd   | nd   | nd   | nd   | nd   |
| Azinphos-methyl       | nd | nd   | nd   | nd   | nd   | nd    | nd   | nd   | nd   | nd    | nd   | nd    | nd   | nd   | nd    | nd   | nd   | nd   | 1.03 | nd   |
| Aziprotryne           | nd | nd   | nd   | nd   | nd   | nd    | nd   | nd   | nd   | nd    | nd   | nd    | nd   | nd   | nd    | nd   | nd   | nd   | nd   | nd   |
| Azoxystrobin          | nd | nd   | nd   | 5.67 | nd   | 11.42 | 1.07 | 3.50 | 1.30 | 3.90  | 3.94 | 10.45 | 2.16 | 2.08 | 1.43  | 1.07 | 1.59 | 1.84 | 2.78 | 1.53 |

|                              |    |    |    |       |    |      |    |    |    |      |    |       |    |    |    |    |    |    |      |    |
|------------------------------|----|----|----|-------|----|------|----|----|----|------|----|-------|----|----|----|----|----|----|------|----|
| Benalaxyl                    | nd | nd | nd | nd    | nd | nd   | nd | nd | nd | nd   | nd | nd    | nd | nd | nd | nd | nd | nd | 1.75 | nd |
| Bendiocarb                   | nd | nd | nd | nd    | nd | nd   | nd | nd | nd | nd   | nd | nd    | nd | nd | nd | nd | nd | nd | 1.84 | nd |
| Benflutamid                  | nd | nd | nd | nd    | nd | nd   | nd | nd | nd | nd   | nd | nd    | nd | nd | nd | nd | nd | nd | nd   | nd |
| Bensulfuron-metil            | nd | nd | nd | nd    | nd | nd   | nd | nd | nd | nd   | nd | nd    | nd | nd | nd | nd | nd | nd | 1.41 | nd |
| Benthiavdicarb-<br>isopropyl | nd | nd | nd | nd    | nd | nd   | nd | nd | nd | nd   | nd | nd    | nd | nd | nd | nd | nd | nd | 1.81 | nd |
| Benzolprop-ethyl             | nd | nd | nd | nd    | nd | nd   | nd | nd | nd | nd   | nd | nd    | nd | nd | nd | nd | nd | nd | 1.81 | nd |
| Benzoximate                  | nd | nd | nd | nd    | nd | nd   | nd | nd | nd | nd   | nd | nd    | nd | nd | nd | nd | nd | nd | nd   | nd |
| Benzthiazuron                | nd | nd | nd | nd    | nd | nd   | nd | nd | nd | nd   | nd | nd    | nd | nd | nd | nd | nd | nd | nd   | nd |
| Bifenazate                   | nd | nd | nd | nd    | nd | nd   | nd | nd | nd | nd   | nd | nd    | nd | nd | nd | nd | nd | nd | nd   | nd |
| Bitertanol                   | nd | nd | nd | nd    | nd | nd   | nd | nd | nd | nd   | nd | nd    | nd | nd | nd | nd | nd | nd | nd   | nd |
| Boscalid                     | nd | nd | nd | 15.32 | nd | 6.71 | nd | nd | nd | 6.15 | nd | 14.19 | nd   | nd |
| Bromucanazole-Isomer         | nd | nd | nd | nd    | nd | nd   | nd | nd | nd | nd   | nd | nd    | nd | nd | nd | nd | nd | nd | nd   | nd |
| Bupirimate                   | nd | nd | nd | nd    | nd | nd   | nd | nd | nd | nd   | nd | nd    | nd | nd | nd | nd | nd | nd | 1.55 | nd |
| Buprofezin                   | nd | nd | nd | nd    | nd | nd   | nd | nd | nd | nd   | nd | nd    | nd | nd | nd | nd | nd | nd | 1.46 | nd |
| Butafenacil                  | nd | nd | nd | nd    | nd | nd   | nd | nd | nd | nd   | nd | nd    | nd | nd | nd | nd | nd | nd | 1.09 | nd |
| Butocarboxim-sulfoxide       | nd | nd | nd | nd    | nd | nd   | nd | nd | nd | nd   | nd | nd    | nd | nd | nd | nd | nd | nd | nd   | nd |
| Butoxycarboxim               | nd | nd | nd | nd    | nd | nd   | nd | nd | nd | nd   | nd | nd    | nd | nd | nd | nd | nd | nd | nd   | nd |
| Buturon                      | nd | nd | nd | nd    | nd | nd   | nd | nd | nd | nd   | nd | nd    | nd | nd | nd | nd | nd | nd | nd   | nd |
| Cadusafos                    | nd | nd | nd | nd    | nd | nd   | nd | nd | nd | nd   | nd | nd    | nd | nd | nd | nd | nd | nd | 1.25 | nd |

|                     |      |       |      |       |      |      |      |       |       |      |       |       |       |       |      |       |       |       |       |       |
|---------------------|------|-------|------|-------|------|------|------|-------|-------|------|-------|-------|-------|-------|------|-------|-------|-------|-------|-------|
| Carbaryl            | nd   | nd    | nd   | nd    | nd   | nd   | nd   | nd    | nd    | nd   | nd    | nd    | nd    | nd    | nd   | nd    | nd    | nd    | 1.53  | nd    |
| Carbendazim         | 2.77 | 15.35 | 8.46 | 28.52 | 1.93 | 5.92 | 9.28 | 14.08 | 10.39 | 3.37 | 16.81 | 19.36 | 10.08 | 16.27 | 7.45 | 10.34 | 11.96 | 12.29 | 18.79 | 13.75 |
| Carbetamide         | nd   | nd    | nd   | nd    | nd   | nd   | nd   | nd    | nd    | nd   | nd    | nd    | nd    | nd    | nd   | nd    | nd    | nd    | 1.13  | nd    |
| Carbofuran          | nd   | nd    | nd   | nd    | nd   | nd   | nd   | nd    | nd    | nd   | nd    | nd    | nd    | nd    | nd   | nd    | nd    | nd    | 1.55  | nd    |
| Carboxin            | nd   | nd    | nd   | nd    | nd   | nd   | nd   | nd    | nd    | nd   | nd    | nd    | nd    | nd    | nd   | nd    | nd    | nd    | 1.26  | nd    |
| Carfentrazon        | nd   | nd    | nd   | nd    | nd   | nd   | nd   | nd    | nd    | nd   | nd    | nd    | nd    | nd    | nd   | nd    | nd    | nd    | 1.23  | nd    |
| Carfentrazone-ethyl | nd   | nd    | nd   | nd    | nd   | nd   | nd   | nd    | nd    | nd   | nd    | nd    | nd    | nd    | nd   | nd    | nd    | nd    | 1.66  | nd    |
| Chlorantraniliprole | nd   | nd    | nd   | 9.52  | nd   | 3.26 | nd   | nd    | nd    | nd   | nd    | nd    | nd    | nd    | nd   | nd    | nd    | nd    | 1.38  | nd    |
| Chlorbromuron       | nd   | nd    | nd   | nd    | nd   | nd   | nd   | nd    | nd    | nd   | nd    | nd    | nd    | nd    | nd   | nd    | nd    | nd    | nd    | nd    |
| Chlorfenvinphos     | nd   | nd    | nd   | nd    | nd   | nd   | nd   | nd    | nd    | nd   | nd    | nd    | nd    | nd    | nd   | nd    | nd    | nd    | 1.33  | nd    |
| Chlorfluazuron      | nd   | nd    | nd   | nd    | nd   | nd   | nd   | nd    | nd    | nd   | nd    | nd    | nd    | nd    | nd   | nd    | nd    | nd    | nd    | nd    |
| Chloridazon         | nd   | nd    | nd   | nd    | nd   | nd   | nd   | nd    | nd    | nd   | nd    | nd    | nd    | nd    | nd   | nd    | nd    | nd    | nd    | nd    |
| Chlorotoluron       | nd   | nd    | nd   | nd    | nd   | 5.23 | nd   | nd    | nd    | nd   | nd    | nd    | nd    | nd    | nd   | nd    | nd    | nd    | 1.95  | nd    |
| Chloroxuron         | nd   | nd    | nd   | nd    | nd   | nd   | nd   | nd    | nd    | nd   | nd    | nd    | nd    | nd    | nd   | nd    | nd    | nd    | nd    | nd    |
| Chlorpyrifos        | nd   | nd    | nd   | nd    | nd   | nd   | nd   | nd    | nd    | nd   | nd    | nd    | nd    | nd    | nd   | nd    | nd    | nd    | nd    | nd    |
| Chlorsulfuron       | nd   | nd    | nd   | nd    | nd   | nd   | nd   | nd    | nd    | nd   | nd    | nd    | nd    | nd    | nd   | nd    | nd    | nd    | nd    | nd    |
| Chromafenozide      | nd   | nd    | nd   | nd    | nd   | nd   | nd   | nd    | nd    | nd   | nd    | nd    | nd    | nd    | nd   | nd    | nd    | nd    | 1.34  | nd    |
| Cinosulfuron        | nd   | nd    | nd   | nd    | nd   | nd   | nd   | nd    | nd    | nd   | nd    | nd    | nd    | nd    | nd   | nd    | nd    | nd    | 1.22  | nd    |
| Cirimidine          | nd   | nd    | nd   | nd    | nd   | nd   | nd   | nd    | nd    | nd   | nd    | nd    | nd    | nd    | nd   | nd    | nd    | nd    | nd    | nd    |



|                          |    |    |    |    |    |      |    |    |    |      |    |      |    |    |    |    |    |    |      |    |
|--------------------------|----|----|----|----|----|------|----|----|----|------|----|------|----|----|----|----|----|----|------|----|
| Clethodim-Isomer         | nd | nd | nd | nd | nd | nd   | nd | nd | nd | nd   | nd | nd   | nd | nd | nd | nd | nd | nd | nd   | nd |
| Clomazone                | nd | nd | nd | nd | nd | nd   | nd | nd | nd | nd   | nd | nd   | nd | nd | nd | nd | nd | nd | 1.33 | nd |
| Cloquintocet-mexyl       | nd | nd | nd | nd | nd | nd   | nd | nd | nd | nd   | nd | nd   | nd | nd | nd | nd | nd | nd | 1.38 | nd |
| Clothianidin             | nd | nd | nd | nd | nd | 4.00 | nd | nd | nd | 4.08 | nd | 8.71 | nd   | nd |
| Coumaphos                | nd | nd | nd | nd | nd | nd   | nd | nd | nd | nd   | nd | nd   | nd | nd | nd | nd | nd | nd | nd   | nd |
| Cruformat(Ruelene)       | nd | nd | nd | nd | nd | nd   | nd | nd | nd | nd   | nd | nd   | nd | nd | nd | nd | nd | nd | nd   | nd |
| Cyanazine                | nd | nd | nd | nd | nd | nd   | nd | nd | nd | nd   | nd | nd   | nd | nd | nd | nd | nd | nd | 1.91 | nd |
| Cyazofamid               | nd | nd | nd | nd | nd | nd   | nd | nd | nd | nd   | nd | nd   | nd | nd | nd | nd | nd | nd | nd   | nd |
| Cybutrine                | nd | nd | nd | nd | nd | nd   | nd | nd | nd | nd   | nd | nd   | nd | nd | nd | nd | nd | nd | nd   | nd |
| Cyflufenamid             | nd | nd | nd | nd | nd | nd   | nd | nd | nd | nd   | nd | nd   | nd | nd | nd | nd | nd | nd | nd   | nd |
| Cymiazole                | nd | nd | nd | nd | nd | nd   | nd | nd | nd | nd   | nd | nd   | nd | nd | nd | nd | nd | nd | nd   | nd |
| Cymoxanil                | nd | nd | nd | nd | nd | nd   | nd | nd | nd | nd   | nd | nd   | nd | nd | nd | nd | nd | nd | nd   | nd |
| Cyproconazole-Isomer     | nd | nd | nd | nd | nd | nd   | nd | nd | nd | nd   | nd | nd   | nd | nd | nd | nd | nd | nd | nd   | nd |
| Cyprodinil               | nd | nd | nd | nd | nd | nd   | nd | nd | nd | nd   | nd | nd   | nd | nd | nd | nd | nd | nd | nd   | nd |
| Cyromazine               | nd | nd | nd | nd | nd | nd   | nd | nd | nd | nd   | nd | nd   | nd | nd | nd | nd | nd | nd | nd   | nd |
| Demeton-S                | nd | nd | nd | nd | nd | nd   | nd | nd | nd | nd   | nd | nd   | nd | nd | nd | nd | nd | nd | nd   | nd |
| Demeton-S-methylsulphone | nd | nd | nd | nd | nd | nd   | nd | nd | nd | nd   | nd | nd   | nd | nd | nd | nd | nd | nd | 1.42 | nd |
| Demeton-S-sulfoxide      | nd | nd | nd | nd | nd | nd   | nd | nd | nd | nd   | nd | nd   | nd | nd | nd | nd | nd | nd | nd   | nd |
| Desmedipham              | nd | nd | nd | nd | nd | nd   | nd | nd | nd | nd   | nd | nd   | nd | nd | nd | nd | nd | nd | 1.39 | nd |

|                       |    |    |    |    |      |    |    |    |    |    |    |      |    |    |      |    |      |      |      |
|-----------------------|----|----|----|----|------|----|----|----|----|----|----|------|----|----|------|----|------|------|------|
| Desmetryn             | nd | nd | nd | nd | nd   | nd | nd | nd | nd | nd | nd | nd   | nd | nd | nd   | nd | nd   | 1.56 | nd   |
| Diazinon              | nd | nd | nd | nd | nd   | nd | nd | nd | nd | nd | nd | nd   | nd | nd | nd   | nd | nd   | 1.42 | nd   |
| Diclobutrazol         | nd | nd | nd | nd | nd   | nd | nd | nd | nd | nd | nd | nd   | nd | nd | nd   | nd | nd   | nd   | nd   |
| Dicrotophos           | nd | nd | nd | nd | nd   | nd | nd | nd | nd | nd | nd | nd   | nd | nd | nd   | nd | nd   | 1.63 | nd   |
| Diethofencarb         | nd | nd | nd | nd | nd   | nd | nd | nd | nd | nd | nd | nd   | nd | nd | nd   | nd | nd   | 1.38 | nd   |
| Difenoconazole-Isomer | nd | nd | nd | nd | nd   | nd | nd | nd | nd | nd | nd | nd   | nd | nd | nd   | nd | 1.71 | nd   | 2.19 |
| Difenoxyuron          | nd | nd | nd | nd | nd   | nd | nd | nd | nd | nd | nd | nd   | nd | nd | nd   | nd | nd   | 1.65 | nd   |
| Diflubenzuron         | nd | nd | nd | nd | nd   | nd | nd | nd | nd | nd | nd | nd   | nd | nd | nd   | nd | nd   | 1.02 | nd   |
| Diflufenican          | nd | nd | nd | nd | nd   | nd | nd | nd | nd | nd | nd | nd   | nd | nd | nd   | nd | nd   | nd   | nd   |
| Dimefox               | nd | nd | nd | nd | nd   | nd | nd | nd | nd | nd | nd | nd   | nd | nd | nd   | nd | nd   | nd   | nd   |
| Dimefuron             | nd | nd | nd | nd | nd   | nd | nd | nd | nd | nd | nd | nd   | nd | nd | nd   | nd | nd   | nd   | nd   |
| Dimethachlor          | nd | nd | nd | nd | nd   | nd | nd | nd | nd | nd | nd | nd   | nd | nd | nd   | nd | nd   | nd   | nd   |
| Dimethenamid          | nd | nd | nd | nd | nd   | nd | nd | nd | nd | nd | nd | 1.50 | nd | nd | 1.24 | nd | nd   | 1.79 | nd   |
| Dimethirimol          | nd | nd | nd | nd | nd   | nd | nd | nd | nd | nd | nd | nd   | nd | nd | nd   | nd | nd   | 1.52 | nd   |
| Dimethoate            | nd | nd | nd | nd | nd   | nd | nd | nd | nd | nd | nd | nd   | nd | nd | nd   | nd | nd   | 1.42 | nd   |
| Dimethomorph-Isomer   | nd | nd | nd | nd | 4.04 | nd   | nd | nd | nd   | nd | nd   | nd   | nd   |
| Dimoxystrobin         | nd | nd | nd | nd | nd   | nd | nd | nd | nd | nd | nd | nd   | nd | nd | nd   | nd | nd   | 1.60 | nd   |
| Diniconazole          | nd | nd | nd | nd | nd   | nd | nd | nd | nd | nd | nd | nd   | nd | nd | nd   | nd | nd   | nd   | nd   |
| Dioxacarb             | nd | nd | nd | nd | nd   | nd | nd | nd | nd | nd | nd | nd   | nd | nd | nd   | nd | nd   | 1.24 | nd   |

|                           |    |    |    |      |    |      |      |    |    |      |    |      |    |    |    |    |    |      |      |
|---------------------------|----|----|----|------|----|------|------|----|----|------|----|------|----|----|----|----|----|------|------|
| Diphenamid                | nd | nd | nd | nd   | nd | nd   | nd   | nd | nd | nd   | nd | nd   | nd | nd | nd | nd | nd | 1.51 | nd   |
| Dipropetryn               | nd | nd | nd | nd   | nd | nd   | nd   | nd | nd | nd   | nd | nd   | nd | nd | nd | nd | nd | nd   | nd   |
| Diuron                    | nd | nd | nd | 5.40 | nd | 2.51 | nd   | nd | nd | 3.16 | nd | nd   | nd | nd | nd | nd | nd | nd   | nd   |
| Dodemorph                 | nd | nd | nd | nd   | nd | nd   | 1.63 | nd | nd | nd   | nd | nd   | nd | nd | nd | nd | nd | 3.12 | 2.01 |
| Emamectin-benzoate<br>b1a | nd | nd | nd | nd   | nd | nd   | nd   | nd | nd | nd   | nd | nd   | nd | nd | nd | nd | nd | nd   | nd   |
| Epoxiconazole             | nd | nd | nd | nd   | nd | nd   | nd   | nd | nd | nd   | nd | 8.40 | nd | nd | nd | nd | nd | nd   | nd   |
| Etaconazole-Isomer        | nd | nd | nd | nd   | nd | nd   | nd   | nd | nd | nd   | nd | nd   | nd | nd | nd | nd | nd | nd   | nd   |
| Ethidimuron               | nd | nd | nd | nd   | nd | nd   | nd   | nd | nd | nd   | nd | nd   | nd | nd | nd | nd | nd | 1.50 | nd   |
| Ethiofencarb              | nd | nd | nd | nd   | nd | nd   | nd   | nd | nd | nd   | nd | nd   | nd | nd | nd | nd | nd | nd   | nd   |
| Ethiofencarb-sulfone      | nd | nd | nd | nd   | nd | nd   | nd   | nd | nd | nd   | nd | nd   | nd | nd | nd | nd | nd | 1.74 | nd   |
| Ethiofencarb-sulfoxide    | nd | nd | nd | nd   | nd | nd   | nd   | nd | nd | nd   | nd | nd   | nd | nd | nd | nd | nd | nd   | nd   |
| Ethion                    | nd | nd | nd | nd   | nd | nd   | nd   | nd | nd | nd   | nd | nd   | nd | nd | nd | nd | nd | nd   | nd   |
| Ethiprole                 | nd | nd | nd | nd   | nd | nd   | nd   | nd | nd | nd   | nd | nd   | nd | nd | nd | nd | nd | nd   | nd   |
| Ethirimol                 | nd | nd | nd | nd   | nd | nd   | nd   | nd | nd | nd   | nd | nd   | nd | nd | nd | nd | nd | nd   | nd   |
| Ethoprophos               | nd | nd | nd | nd   | nd | nd   | nd   | nd | nd | nd   | nd | nd   | nd | nd | nd | nd | nd | nd   | nd   |
| Etoxazole                 | nd | nd | nd | nd   | nd | nd   | nd   | nd | nd | nd   | nd | nd   | nd | nd | nd | nd | nd | 1.51 | nd   |
| Etrimfos                  | nd | nd | nd | nd   | nd | nd   | nd   | nd | nd | nd   | nd | nd   | nd | nd | nd | nd | nd | nd   | nd   |
| Fenamidone                | nd | nd | nd | nd   | nd | nd   | nd   | nd | nd | nd   | nd | nd   | nd | nd | nd | nd | nd | 1.48 | nd   |
| Fenamiphos                | nd | nd | nd | nd   | nd | nd   | nd   | nd | nd | nd   | nd | nd   | nd | nd | nd | nd | nd | 1.41 | nd   |

|                       |    |    |    |       |    |    |      |    |    |    |    |    |    |    |    |    |      |      |      |      |
|-----------------------|----|----|----|-------|----|----|------|----|----|----|----|----|----|----|----|----|------|------|------|------|
| Fenamiphos-sulfone    | nd | nd | nd | nd    | nd | nd | nd   | nd | nd | nd | nd | nd | nd | nd | nd | nd | nd   | 1.61 | nd   |      |
| Fenamiphos-sulfoxide  | nd | nd | nd | nd    | nd | nd | nd   | nd | nd | nd | nd | nd | nd | nd | nd | nd | 1.33 | nd   | 1.63 | nd   |
| Fenarimol             | nd | nd | nd | 7.58  | nd | nd | nd   | nd | nd | nd | nd | nd | nd | nd | nd | nd | nd   | nd   | nd   | nd   |
| Fenbuconazole         | nd | nd | nd | nd    | nd | nd | nd   | nd | nd | nd | nd | nd | nd | nd | nd | nd | nd   | nd   | nd   | nd   |
| Fenfuram              | nd | nd | nd | nd    | nd | nd | nd   | nd | nd | nd | nd | nd | nd | nd | nd | nd | nd   | nd   | nd   | nd   |
| Fenhexamid            | nd | nd | nd | 36.32 | nd | nd | nd   | nd | nd | nd | nd | nd | nd | nd | nd | nd | nd   | nd   | nd   | nd   |
| Fenobucarb            | nd | nd | nd | nd    | nd | nd | nd   | nd | nd | nd | nd | nd | nd | nd | nd | nd | nd   | nd   | 1.33 | nd   |
| Fenoxycarb            | nd | nd | nd | nd    | nd | nd | nd   | nd | nd | nd | nd | nd | nd | nd | nd | nd | nd   | nd   | nd   | nd   |
| Fenpropimorph         | nd | nd | nd | nd    | nd | nd | 1.37 | nd   | nd   | 2.65 | 1.53 |
| Fensulfothion         | nd | nd | nd | nd    | nd | nd | nd   | nd | nd | nd | nd | nd | nd | nd | nd | nd | nd   | nd   | 1.54 | nd   |
| Fensulfothion-oxon    | nd | nd | nd | nd    | nd | nd | nd   | nd | nd | nd | nd | nd | nd | nd | nd | nd | nd   | nd   | nd   | nd   |
| Fensulfothion-sulfone | nd | nd | nd | nd    | nd | nd | nd   | nd | nd | nd | nd | nd | nd | nd | nd | nd | nd   | nd   | nd   | nd   |
| Fenthion-sulfoxid     | nd | nd | nd | nd    | nd | nd | nd   | nd | nd | nd | nd | nd | nd | nd | nd | nd | nd   | nd   | 1.54 | nd   |
| Fenuron               | nd | nd | nd | nd    | nd | nd | nd   | nd | nd | nd | nd | nd | nd | nd | nd | nd | nd   | nd   | nd   | nd   |
| Flamprop-isopropyl    | nd | nd | nd | nd    | nd | nd | nd   | nd | nd | nd | nd | nd | nd | nd | nd | nd | nd   | nd   | nd   | nd   |
| Flamprop-methyl       | nd | nd | nd | nd    | nd | nd | nd   | nd | nd | nd | nd | nd | nd | nd | nd | nd | nd   | nd   | nd   | nd   |
| Flazasulfuron         | nd | nd | nd | nd    | nd | nd | nd   | nd | nd | nd | nd | nd | nd | nd | nd | nd | nd   | nd   | 1.62 | nd   |
| Flonicamid            | nd | nd | nd | nd    | nd | nd | nd   | nd | nd | nd | nd | nd | nd | nd | nd | nd | nd   | nd   | nd   | nd   |
| Florasulam            | nd | nd | nd | nd    | nd | nd | nd   | nd | nd | nd | nd | nd | nd | nd | nd | nd | nd   | nd   | nd   | nd   |

|                 |    |    |    |    |    |      |    |    |    |    |    |      |    |    |    |    |      |    |      |    |
|-----------------|----|----|----|----|----|------|----|----|----|----|----|------|----|----|----|----|------|----|------|----|
| Fluazuron       | nd | nd | nd | nd | nd | nd   | nd | nd | nd | nd | nd | nd   | nd | nd | nd | nd | nd   | nd | nd   | nd |
| Flubendiamide   | nd | nd | nd | nd | nd | nd   | nd | nd | nd | nd | nd | nd   | nd | nd | nd | nd | nd   | nd | nd   | nd |
| Flufenacet      | nd | nd | nd | nd | nd | nd   | nd | nd | nd | nd | nd | nd   | nd | nd | nd | nd | nd   | nd | 1.35 | nd |
| Flufenoxuron    | nd | nd | nd | nd | nd | nd   | nd | nd | nd | nd | nd | nd   | nd | nd | nd | nd | nd   | nd | nd   | nd |
| Fluometuron     | nd | nd | nd | nd | nd | nd   | nd | nd | nd | nd | nd | nd   | nd | nd | nd | nd | nd   | nd | nd   | nd |
| Fluopicolide    | nd | nd | nd | nd | nd | nd   | nd | nd | nd | nd | nd | nd   | nd | nd | nd | nd | nd   | nd | 1.28 | nd |
| Fluopyram       | nd | nd | nd | nd | nd | 3.98 | nd | nd | nd | nd | nd | 5.71 | nd | nd | nd | nd | 1.10 | nd | 1.53 | nd |
| Fluoxastrobin   | nd | nd | nd | nd | nd | nd   | nd | nd | nd | nd | nd | nd   | nd | nd | nd | nd | nd   | nd | 1.53 | nd |
| Fluquinconazole | nd | nd | nd | nd | nd | nd   | nd | nd | nd | nd | nd | nd   | nd | nd | nd | nd | nd   | nd | nd   | nd |
| Fluridone       | nd | nd | nd | nd | nd | nd   | nd | nd | nd | nd | nd | nd   | nd | nd | nd | nd | nd   | nd | 1.49 | nd |
| Flusilazole     | nd | nd | nd | nd | nd | nd   | nd | nd | nd | nd | nd | nd   | nd | nd | nd | nd | nd   | nd | 1.65 | nd |
| Flutolanil      | nd | nd | nd | nd | nd | nd   | nd | nd | nd | nd | nd | nd   | nd | nd | nd | nd | nd   | nd | 1.80 | nd |
| Flutriafol      | nd | nd | nd | nd | nd | nd   | nd | nd | nd | nd | nd | nd   | nd | nd | nd | nd | nd   | nd | nd   | nd |
| Fluxapyroxad    | nd | nd | nd | nd | nd | nd   | nd | nd | nd | nd | nd | 1.31 | nd | nd | nd | nd | nd   | nd | 1.59 | nd |
| Fonofos         | nd | nd | nd | nd | nd | nd   | nd | nd | nd | nd | nd | nd   | nd | nd | nd | nd | nd   | nd | nd   | nd |
| Foramsulfuron   | nd | nd | nd | nd | nd | nd   | nd | nd | nd | nd | nd | nd   | nd | nd | nd | nd | nd   | nd | 1.96 | nd |
| Forchlorfenuron | nd | nd | nd | nd | nd | nd   | nd | nd | nd | nd | nd | nd   | nd | nd | nd | nd | nd   | nd | nd   | nd |
| Formetanate HCl | nd | nd | nd | nd | nd | nd   | nd | nd | nd | nd | nd | nd   | nd | nd | nd | nd | nd   | nd | nd   | nd |
| Fosthiazat      | nd | nd | nd | nd | nd | nd   | nd | nd | nd | nd | nd | nd   | nd | nd | nd | nd | nd   | nd | 1.47 | nd |

|                         |    |    |    |       |      |       |    |    |    |       |    |       |    |    |      |    |    |    |      |    |
|-------------------------|----|----|----|-------|------|-------|----|----|----|-------|----|-------|----|----|------|----|----|----|------|----|
| Fuberidazole            | nd | nd | nd | nd    | nd   | nd    | nd | nd | nd | nd    | nd | nd    | nd | nd | nd   | nd | nd | nd | 1.60 | nd |
| Furalaxyl               | nd | nd | nd | nd    | nd   | nd    | nd | nd | nd | nd    | nd | nd    | nd | nd | nd   | nd | nd | nd | 1.54 | nd |
| Furathiocarb            | nd | nd | nd | nd    | nd   | nd    | nd | nd | nd | nd    | nd | nd    | nd | nd | nd   | nd | nd | nd | nd   | nd |
| Halofenozide            | nd | nd | nd | nd    | nd   | nd    | nd | nd | nd | nd    | nd | nd    | nd | nd | nd   | nd | nd | nd | nd   | nd |
| Haloxyfop-2-ethoxyethyl | nd | nd | nd | nd    | nd   | nd    | nd | nd | nd | nd    | nd | nd    | nd | nd | nd   | nd | nd | nd | 1.48 | nd |
| Haloxyfop-P-methyl      | nd | nd | nd | nd    | nd   | nd    | nd | nd | nd | nd    | nd | nd    | nd | nd | nd   | nd | nd | nd | 1.69 | nd |
| Heptenophos             | nd | nd | nd | nd    | nd   | nd    | nd | nd | nd | nd    | nd | nd    | nd | nd | nd   | nd | nd | nd | nd   | nd |
| Hexaconazole            | nd | nd | nd | nd    | nd   | nd    | nd | nd | nd | nd    | nd | nd    | nd | nd | nd   | nd | nd | nd | nd   | nd |
| Hexaflumuron            | nd | nd | nd | nd    | nd   | nd    | nd | nd | nd | nd    | nd | nd    | nd | nd | nd   | nd | nd | nd | nd   | nd |
| Hexazonon(Velpar)       | nd | nd | nd | nd    | nd   | nd    | nd | nd | nd | nd    | nd | nd    | nd | nd | nd   | nd | nd | nd | 2.04 | nd |
| Hydramethylnon          | nd | nd | nd | nd    | nd   | nd    | nd | nd | nd | nd    | nd | nd    | nd | nd | nd   | nd | nd | nd | nd   | nd |
| Hydroxycarbofuran       | nd | nd | nd | nd    | nd   | nd    | nd | nd | nd | nd    | nd | nd    | nd | nd | nd   | nd | nd | nd | 1.45 | nd |
| Imazalil                | nd | nd | nd | nd    | nd   | nd    | nd | nd | nd | nd    | nd | nd    | nd | nd | nd   | nd | nd | nd | nd   | nd |
| Imazaquin               | nd | nd | nd | nd    | nd   | nd    | nd | nd | nd | nd    | nd | nd    | nd | nd | nd   | nd | nd | nd | nd   | nd |
| Imidacloprid            | nd | nd | nd | 32.21 | 4.11 | 27.85 | nd | nd | nd | 10.85 | nd | 37.13 | nd | nd | 1.85 | nd | nd | nd | nd   | nd |
| Indoxacarb              | nd | nd | nd | nd    | nd   | nd    | nd | nd | nd | nd    | nd | nd    | nd | nd | nd   | nd | nd | nd | nd   | nd |
| Ipconazole              | nd | nd | nd | nd    | nd   | nd    | nd | nd | nd | nd    | nd | nd    | nd | nd | nd   | nd | nd | nd | nd   | nd |
| Iprobenfos              | nd | nd | nd | nd    | nd   | nd    | nd | nd | nd | nd    | nd | nd    | nd | nd | nd   | nd | nd | nd | nd   | nd |
| Iprovalicarb            | nd | nd | nd | nd    | nd   | nd    | nd | nd | nd | nd    | nd | nd    | nd | nd | nd   | nd | nd | nd | nd   | nd |

|                   |    |    |    |      |    |      |    |    |    |    |    |       |    |    |    |    |    |    |      |    |
|-------------------|----|----|----|------|----|------|----|----|----|----|----|-------|----|----|----|----|----|----|------|----|
| Isocarbamide      | nd | nd | nd | nd   | nd | nd   | nd | nd | nd | nd | nd | nd    | nd | nd | nd | nd | nd | nd | nd   | nd |
| Isofenphos        | nd | nd | nd | nd   | nd | nd   | nd | nd | nd | nd | nd | nd    | nd | nd | nd | nd | nd | nd | nd   | nd |
| Isofenphos-methyl | nd | nd | nd | nd   | nd | nd   | nd | nd | nd | nd | nd | nd    | nd | nd | nd | nd | nd | nd | nd   | nd |
| Isoprocarb        | nd | nd | nd | nd   | nd | nd   | nd | nd | nd | nd | nd | nd    | nd | nd | nd | nd | nd | nd | nd   | nd |
| Isoprothiolane    | nd | nd | nd | nd   | nd | nd   | nd | nd | nd | nd | nd | nd    | nd | nd | nd | nd | nd | nd | nd   | nd |
| Isoproturon       | nd | nd | nd | 1.90 | nd | 3.85 | nd | nd | nd | nd | nd | 10.89 | nd | nd | nd | nd | nd | nd | 1.95 | nd |
| Isoxaflutole      | nd | nd | nd | nd   | nd | nd   | nd | nd | nd | nd | nd | nd    | nd | nd | nd | nd | nd | nd | nd   | nd |
| Isoxathion        | nd | nd | nd | nd   | nd | nd   | nd | nd | nd | nd | nd | nd    | nd | nd | nd | nd | nd | nd | nd   | nd |
| Ivermectin        | nd | nd | nd | nd   | nd | nd   | nd | nd | nd | nd | nd | nd    | nd | nd | nd | nd | nd | nd | nd   | nd |
| izoxaben          | nd | nd | nd | nd   | nd | nd   | nd | nd | nd | nd | nd | nd    | nd | nd | nd | nd | nd | nd | nd   | nd |
| Kresoxim-methyl   | nd | nd | nd | nd   | nd | nd   | nd | nd | nd | nd | nd | nd    | nd | nd | nd | nd | nd | nd | nd   | nd |
| Lenacil           | nd | nd | nd | nd   | nd | nd   | nd | nd | nd | nd | nd | nd    | nd | nd | nd | nd | nd | nd | nd   | nd |
| Lufenuron         | nd | nd | nd | nd   | nd | nd   | nd | nd | nd | nd | nd | nd    | nd | nd | nd | nd | nd | nd | nd   | nd |
| Malaoxon          | nd | nd | nd | nd   | nd | nd   | nd | nd | nd | nd | nd | nd    | nd | nd | nd | nd | nd | nd | 1.34 | nd |
| Malathion         | nd | nd | nd | nd   | nd | nd   | nd | nd | nd | nd | nd | nd    | nd | nd | nd | nd | nd | nd | nd   | nd |
| Mandipropamid     | nd | nd | nd | nd   | nd | nd   | nd | nd | nd | nd | nd | nd    | nd | nd | nd | nd | nd | nd | 1.86 | nd |
| Mecarbam          | nd | nd | nd | nd   | nd | nd   | nd | nd | nd | nd | nd | nd    | nd | nd | nd | nd | nd | nd | nd   | nd |
| Mefenacet         | nd | nd | nd | nd   | nd | nd   | nd | nd | nd | nd | nd | nd    | nd | nd | nd | nd | nd | nd | 1.58 | nd |
| Mepanipirim       | nd | nd | nd | nd   | nd | nd   | nd | nd | nd | nd | nd | nd    | nd | nd | nd | nd | nd | nd | nd   | nd |

|                    |      |      |      |      |    |       |      |      |      |      |      |       |      |      |      |      |      |      |      |      |
|--------------------|------|------|------|------|----|-------|------|------|------|------|------|-------|------|------|------|------|------|------|------|------|
| Mephosfolan        | nd   | nd   | nd   | nd   | nd | nd    | nd   | nd   | nd   | nd   | nd   | nd    | nd   | nd   | nd   | nd   | nd   | nd   | 1.38 | nd   |
| Mepronil           | nd   | nd   | nd   | nd   | nd | nd    | nd   | nd   | nd   | nd   | nd   | nd    | nd   | nd   | nd   | nd   | nd   | nd   | nd   | nd   |
| Mesotrione         | nd   | nd   | nd   | nd   | nd | nd    | nd   | nd   | nd   | nd   | nd   | nd    | nd   | nd   | nd   | nd   | nd   | nd   | nd   | nd   |
| Metaflumizone      | nd   | nd   | nd   | nd   | nd | nd    | nd   | nd   | nd   | nd   | nd   | nd    | nd   | nd   | nd   | nd   | nd   | nd   | nd   | nd   |
| Metalaxyl          | nd   | nd   | nd   | 2.71 | nd | nd    | nd   | nd   | nd   | 3.69 | nd   | 9.39  | nd   | nd   | nd   | nd   | nd   | nd   | 1.63 | nd   |
| Metamitron         | nd   | nd   | nd   | nd   | nd | nd    | nd   | nd   | nd   | nd   | nd   | nd    | nd   | nd   | nd   | nd   | nd   | nd   | nd   | nd   |
| Metazachlor        | nd   | nd   | nd   | nd   | nd | nd    | nd   | nd   | nd   | nd   | nd   | nd    | nd   | nd   | nd   | nd   | nd   | nd   | 1.43 | nd   |
| Metconazole        | nd   | nd   | nd   | nd   | nd | nd    | nd   | nd   | nd   | nd   | nd   | nd    | nd   | nd   | nd   | nd   | nd   | nd   | nd   | nd   |
| Methabenzthiazuron | nd   | nd   | nd   | nd   | nd | nd    | nd   | nd   | nd   | nd   | nd   | nd    | nd   | nd   | nd   | nd   | nd   | nd   | nd   | nd   |
| Methamidophos      | nd   | nd   | nd   | nd   | nd | nd    | nd   | nd   | nd   | nd   | nd   | nd    | nd   | nd   | nd   | nd   | nd   | nd   | nd   | nd   |
| Methidathion       | nd   | nd   | nd   | nd   | nd | nd    | nd   | nd   | nd   | nd   | nd   | nd    | nd   | nd   | nd   | nd   | nd   | nd   | nd   | nd   |
| Methiocarb         | nd   | nd   | nd   | nd   | nd | nd    | nd   | nd   | nd   | nd   | nd   | nd    | nd   | nd   | nd   | nd   | nd   | nd   | nd   | nd   |
| Methiocarb-sulfone | nd   | nd   | nd   | nd   | nd | nd    | nd   | nd   | nd   | nd   | nd   | nd    | nd   | nd   | nd   | nd   | nd   | nd   | nd   | nd   |
| Methomyl           | nd   | nd   | nd   | nd   | nd | nd    | nd   | nd   | nd   | nd   | nd   | nd    | nd   | nd   | nd   | nd   | nd   | nd   | nd   | nd   |
| Methoprotryne      | nd   | nd   | nd   | nd   | nd | nd    | nd   | nd   | nd   | nd   | nd   | nd    | nd   | nd   | nd   | nd   | nd   | nd   | 1.61 | nd   |
| Methoxyfenozide    | nd   | nd   | nd   | nd   | nd | nd    | nd   | nd   | nd   | nd   | nd   | nd    | nd   | nd   | nd   | nd   | nd   | nd   | 1.30 | nd   |
| Metobromuron       | nd   | nd   | nd   | nd   | nd | nd    | nd   | nd   | nd   | nd   | nd   | nd    | nd   | nd   | nd   | nd   | nd   | nd   | 1.55 | nd   |
| Metolachlor        | 7.55 | 2.25 | 1.79 | 1.94 | nd | 11.23 | 1.34 | 2.25 | 2.11 | 2.77 | 2.58 | 10.77 | 1.85 | 2.48 | 1.59 | 1.39 | 2.43 | 1.93 | 3.77 | 3.21 |
| Metolcarb          | nd   | nd   | nd   | nd   | nd | nd    | nd   | nd   | nd   | nd   | nd   | nd    | nd   | nd   | nd   | nd   | nd   | nd   | nd   | nd   |



|                    |    |    |    |    |    |    |    |    |    |    |    |    |    |    |    |    |    |    |      |    |
|--------------------|----|----|----|----|----|----|----|----|----|----|----|----|----|----|----|----|----|----|------|----|
| Metosulam          | nd | 2.03 | nd |
| Metoxuron          | nd   | nd |
| Metrafenon         | nd | 1.59 | nd |
| Metsulfuron-methyl | nd | 1.64 | nd |
| Mevinphos-Isomer   | nd   | nd |
| Mexacarbate        | nd | 1.39 | nd |
| Molinate           | nd   | nd |
| Monocrotophos      | nd | 1.54 | nd |
| Monolinuron        | nd   | nd |
| Moxidectin         | nd   | nd |
| Myclobutanil       | nd   | nd |
| Napropamide        | nd   | nd |
| Neburon            | nd   | nd |
| Nitenpyram         | nd   | nd |
| Nitralin           | nd   | nd |
| Norflurazon        | nd   | nd |
| Novaluron          | nd   | nd |
| Nuarimol           | nd | 2.75 | nd |
| Omethoate          | nd | 1.35 | nd |

|                   |    |    |    |       |    |      |    |    |    |    |    |      |    |    |    |    |    |    |      |    |
|-------------------|----|----|----|-------|----|------|----|----|----|----|----|------|----|----|----|----|----|----|------|----|
| Oxadiazon         | nd | nd | nd | nd    | nd | nd   | nd | nd | nd | nd | nd | nd   | nd | nd | nd | nd | nd | nd | nd   | nd |
| Oxadixyl          | nd | nd | nd | nd    | nd | nd   | nd | nd | nd | nd | nd | nd   | nd | nd | nd | nd | nd | nd | nd   | nd |
| Oxamyl            | nd | nd | nd | nd    | nd | nd   | nd | nd | nd | nd | nd | nd   | nd | nd | nd | nd | nd | nd | nd   | nd |
| Oxamyl-oxime      | nd | nd | nd | nd    | nd | nd   | nd | nd | nd | nd | nd | nd   | nd | nd | nd | nd | nd | nd | nd   | nd |
| Oxydemeton-methyl | nd | nd | nd | nd    | nd | nd   | nd | nd | nd | nd | nd | nd   | nd | nd | nd | nd | nd | nd | 1.52 | nd |
| Paclobutrazol     | nd | nd | nd | nd    | nd | nd   | nd | nd | nd | nd | nd | nd   | nd | nd | nd | nd | nd | nd | nd   | nd |
| Paraoxon          | nd | nd | nd | nd    | nd | nd   | nd | nd | nd | nd | nd | nd   | nd | nd | nd | nd | nd | nd | 1.54 | nd |
| Paraoxon-ethyl    | nd | nd | nd | nd    | nd | nd   | nd | nd | nd | nd | nd | nd   | nd | nd | nd | nd | nd | nd | 1.60 | nd |
| Penconazole       | nd | nd | nd | 12.20 | nd | 2.51 | nd | nd | nd | nd | nd | 4.21 | nd   | nd |
| Penthiopyrad      | nd | nd | nd | nd    | nd | nd   | nd | nd | nd | nd | nd | nd   | nd | nd | nd | nd | nd | nd | 1.44 | nd |
| Pethoxamid        | nd | nd | nd | nd    | nd | nd   | nd | nd | nd | nd | nd | nd   | nd | nd | nd | nd | nd | nd | nd   | nd |
| Phenmedipham      | nd | nd | nd | nd    | nd | nd   | nd | nd | nd | nd | nd | nd   | nd | nd | nd | nd | nd | nd | nd   | nd |
| Phenthoate        | nd | nd | nd | nd    | nd | nd   | nd | nd | nd | nd | nd | nd   | nd | nd | nd | nd | nd | nd | nd   | nd |
| Phorate-sulfone   | nd | nd | nd | nd    | nd | nd   | nd | nd | nd | nd | nd | nd   | nd | nd | nd | nd | nd | nd | nd   | nd |
| Phorate-sulfoxide | nd | nd | nd | nd    | nd | nd   | nd | nd | nd | nd | nd | nd   | nd | nd | nd | nd | nd | nd | nd   | nd |
| Phosalone         | nd | nd | nd | nd    | nd | nd   | nd | nd | nd | nd | nd | nd   | nd | nd | nd | nd | nd | nd | nd   | nd |
| Phosmet           | nd | nd | nd | nd    | nd | nd   | nd | nd | nd | nd | nd | nd   | nd | nd | nd | nd | nd | nd | nd   | nd |
| Phosphamidon      | nd | nd | nd | nd    | nd | nd   | nd | nd | nd | nd | nd | nd   | nd | nd | nd | nd | nd | nd | nd   | nd |
| Phoxim            | nd | nd | nd | nd    | nd | nd   | nd | nd | nd | nd | nd | nd   | nd | nd | nd | nd | nd | nd | nd   | nd |

|                               |    |    |    |      |    |      |    |    |    |    |    |      |    |    |    |    |    |    |      |    |
|-------------------------------|----|----|----|------|----|------|----|----|----|----|----|------|----|----|----|----|----|----|------|----|
| Picoxystrobin                 | nd | nd | nd | nd   | nd | nd   | nd | nd | nd | nd | nd | nd   | nd | nd | nd | nd | nd | nd | 1.27 | nd |
| Pinoxaden                     | nd | nd | nd | nd   | nd | nd   | nd | nd | nd | nd | nd | nd   | nd | nd | nd | nd | nd | nd | 1.37 | nd |
| Piperonyl-butoxide            | nd | nd | nd | nd   | nd | nd   | nd | nd | nd | nd | nd | nd   | nd | nd | nd | nd | nd | nd | 1.46 | nd |
| Piperophos                    | nd | nd | nd | nd   | nd | nd   | nd | nd | nd | nd | nd | nd   | nd | nd | nd | nd | nd | nd | 1.31 | nd |
| Pirimicarb                    | nd | nd | nd | 1.69 | nd | nd   | nd | nd | nd | nd | nd | 2.67 | nd | nd | nd | nd | nd | nd | 1.87 | nd |
| Pirimicarb-desmethyl          | nd | nd | nd | nd   | nd | nd   | nd | nd | nd | nd | nd | nd   | nd | nd | nd | nd | nd | nd | 1.52 | nd |
| Pirimiphos-ethyl              | nd | nd | nd | nd   | nd | nd   | nd | nd | nd | nd | nd | nd   | nd | nd | nd | nd | nd | nd | 1.55 | nd |
| Pirimiphos-methyl             | nd | nd | nd | nd   | nd | nd   | nd | nd | nd | nd | nd | nd   | nd | nd | nd | nd | nd | nd | 1.97 | nd |
| Pirimisulfuron-metil          | nd | nd | nd | nd   | nd | nd   | nd | nd | nd | nd | nd | nd   | nd | nd | nd | nd | nd | nd | nd   | nd |
| Prochloraz                    | nd | nd | nd | nd   | nd | nd   | nd | nd | nd | nd | nd | nd   | nd | nd | nd | nd | nd | nd | nd   | nd |
| Prochloraz-desimidazole-amino | nd | nd | nd | nd   | nd | nd   | nd | nd | nd | nd | nd | nd   | nd | nd | nd | nd | nd | nd | nd   | nd |
| Promecarb                     | nd | nd | nd | nd   | nd | nd   | nd | nd | nd | nd | nd | nd   | nd | nd | nd | nd | nd | nd | nd   | nd |
| Prometon                      | nd | nd | nd | nd   | nd | nd   | nd | nd | nd | nd | nd | nd   | nd | nd | nd | nd | nd | nd | 1.79 | nd |
| Prometryne                    | nd | nd | nd | nd   | nd | 7.87 | nd | nd | nd | nd | nd | nd   | nd | nd | nd | nd | nd | nd | 1.53 | nd |
| Propachlor                    | nd | nd | nd | nd   | nd | nd   | nd | nd | nd | nd | nd | nd   | nd | nd | nd | nd | nd | nd | nd   | nd |
| Propamocarb                   | nd | nd | nd | nd   | nd | nd   | nd | nd | nd | nd | nd | nd   | nd | nd | nd | nd | nd | nd | nd   | nd |
| Propanil                      | nd | nd | nd | nd   | nd | nd   | nd | nd | nd | nd | nd | nd   | nd | nd | nd | nd | nd | nd | nd   | nd |
| Propargite                    | nd | nd | nd | nd   | nd | nd   | nd | nd | nd | nd | nd | nd   | nd | nd | nd | nd | nd | nd | nd   | nd |
| Propetamphos                  | nd | nd | nd | nd   | nd | nd   | nd | nd | nd | nd | nd | nd   | nd | nd | nd | nd | nd | nd | nd   | nd |

|                  |    |    |    |    |    |    |      |      |      |    |      |      |      |      |      |    |    |    |      |    |
|------------------|----|----|----|----|----|----|------|------|------|----|------|------|------|------|------|----|----|----|------|----|
| Propiconazole    | nd | nd | nd | nd | nd | nd | 2.22 | 1.84 | 1.74 | nd | 3.23 | 3.57 | 2.91 | 4.37 | 2.04 | nd | nd | nd | nd   | nd |
| Propoxur         | nd   | nd   | nd   | nd | nd   | nd   | nd   | nd   | nd   | nd | nd | nd | 1.59 | nd |
| Propyzamide      | nd   | nd   | nd   | nd | nd   | nd   | nd   | nd   | nd   | nd | nd | nd | nd   | nd |
| Prosulfocarb     | nd   | nd   | nd   | nd | nd   | nd   | nd   | nd   | nd   | nd | nd | nd | 1.66 | nd |
| Pymetrozine      | nd   | nd   | nd   | nd | nd   | nd   | nd   | nd   | nd   | nd | nd | nd | 1.24 | nd |
| Pyracarbolid     | nd   | nd   | nd   | nd | nd   | nd   | nd   | nd   | nd   | nd | nd | nd | 1.04 | nd |
| Pyraclostrobin   | nd   | nd   | nd   | nd | nd   | nd   | nd   | nd   | nd   | nd | nd | nd | 1.52 | nd |
| Pyraflufen-ethyl | nd   | nd   | nd   | nd | nd   | nd   | nd   | nd   | nd   | nd | nd | nd | nd   | nd |
| Pyrazophos       | nd   | nd   | nd   | nd | nd   | nd   | nd   | nd   | nd   | nd | nd | nd | nd   | nd |
| Pyridafol        | nd   | nd   | nd   | nd | nd   | nd   | nd   | nd   | nd   | nd | nd | nd | nd   | nd |
| Pyridaphenthion  | nd   | nd   | nd   | nd | nd   | nd   | nd   | nd   | nd   | nd | nd | nd | 1.28 | nd |
| Pyrifenox        | nd   | nd   | nd   | nd | nd   | nd   | nd   | nd   | nd   | nd | nd | nd | nd   | nd |
| Pyrimethanil     | nd   | nd   | nd   | nd | nd   | nd   | nd   | nd   | nd   | nd | nd | nd | nd   | nd |
| Pyroquilon       | nd   | nd   | nd   | nd | nd   | nd   | nd   | nd   | nd   | nd | nd | nd | nd   | nd |
| Quinalphos       | nd   | nd   | nd   | nd | nd   | nd   | nd   | nd   | nd   | nd | nd | nd | nd   | nd |
| Sebuthylazin     | nd   | nd   | nd   | nd | nd   | nd   | nd   | nd   | nd   | nd | nd | nd | nd   | nd |
| Secbumeton       | nd   | nd   | nd   | nd | nd   | nd   | nd   | nd   | nd   | nd | nd | nd | 2.22 | nd |
| Silthiofam       | nd   | nd   | nd   | nd | nd   | nd   | nd   | nd   | nd   | nd | nd | nd | nd   | nd |
| Simazine         | nd   | nd   | nd   | nd | nd   | nd   | nd   | nd   | nd   | nd | nd | nd | nd   | nd |

|                         |      |       |      |       |    |       |      |       |       |       |       |       |       |       |      |      |       |       |       |
|-------------------------|------|-------|------|-------|----|-------|------|-------|-------|-------|-------|-------|-------|-------|------|------|-------|-------|-------|
| Simetryn                | nd   | nd    | nd   | nd    | nd | nd    | nd   | nd    | nd    | nd    | nd    | nd    | nd    | nd    | nd   | nd   | nd    | 1.37  | nd    |
| Spinetoram              | nd   | nd    | nd   | nd    | nd | nd    | nd   | nd    | nd    | nd    | nd    | nd    | nd    | nd    | nd   | nd   | nd    | nd    | nd    |
| Spiromesifen            | nd   | nd    | nd   | nd    | nd | nd    | nd   | nd    | nd    | nd    | nd    | nd    | nd    | nd    | nd   | nd   | nd    | nd    | nd    |
| Spirotetramat           | nd   | nd    | nd   | nd    | nd | nd    | nd   | nd    | nd    | nd    | nd    | nd    | nd    | nd    | nd   | nd   | nd    | nd    | nd    |
| Spiroxamine-Isomer      | nd   | nd    | nd   | nd    | nd | nd    | nd   | nd    | nd    | nd    | nd    | nd    | nd    | nd    | nd   | nd   | nd    | 2.72  | 1.23  |
| Sulfometuron-methyl     | nd   | nd    | nd   | nd    | nd | nd    | nd   | nd    | nd    | nd    | nd    | nd    | nd    | nd    | nd   | nd   | nd    | nd    | nd    |
| Sulfosulfuron           | nd   | nd    | nd   | nd    | nd | nd    | nd   | nd    | nd    | nd    | nd    | nd    | nd    | nd    | nd   | nd   | nd    | nd    | nd    |
| Tebuconazole            | nd   | nd    | nd   | 5.62  | nd | nd    | nd   | nd    | nd    | nd    | nd    | 15.19 | nd    | nd    | nd   | nd   | nd    | nd    | nd    |
| Tebufenozide            | nd   | nd    | nd   | nd    | nd | nd    | nd   | nd    | nd    | nd    | nd    | nd    | nd    | nd    | nd   | nd   | nd    | nd    | nd    |
| Tebufenpyrad            | nd   | nd    | nd   | nd    | nd | nd    | nd   | nd    | nd    | nd    | nd    | nd    | nd    | nd    | nd   | nd   | nd    | nd    | nd    |
| Tebutam                 | nd   | nd    | nd   | nd    | nd | nd    | nd   | nd    | nd    | nd    | nd    | nd    | nd    | nd    | nd   | nd   | nd    | nd    | nd    |
| Tebuthiuron             | nd   | nd    | nd   | nd    | nd | nd    | nd   | nd    | nd    | nd    | nd    | nd    | nd    | nd    | nd   | nd   | nd    | 1.28  | nd    |
| Terbufos-sulfoxide      | nd   | nd    | nd   | nd    | nd | nd    | nd   | nd    | nd    | nd    | nd    | nd    | nd    | nd    | nd   | nd   | nd    | nd    | nd    |
| Terbumeton              | nd   | nd    | nd   | nd    | nd | nd    | nd   | nd    | nd    | nd    | nd    | nd    | nd    | nd    | nd   | nd   | nd    | 1.88  | nd    |
| Terbuthylazine-desethyl | nd   | nd    | nd   | 18.13 | nd | 1.91  | 1.11 | 1.42  | 1.70  | 3.06  | 1.39  | 1.75  | 1.21  | 1.49  | nd   | 1.07 | 1.20  | 1.16  | 2.54  |
| Terbutryn               | nd   | nd    | nd   | nd    | nd | 5.84  | nd   | 1.66  | nd    | 5.12  | 1.00  | 6.15  | nd    | 1.00  | nd   | nd   | nd    | nd    | nd    |
| Tetrachlorvinphos       | nd   | nd    | nd   | nd    | nd | nd    | nd   | nd    | nd    | nd    | nd    | nd    | nd    | nd    | nd   | nd   | nd    | nd    | nd    |
| Tetraconazole           | nd   | nd    | nd   | nd    | nd | 6.84  | nd   | nd    | nd    | nd    | nd    | nd    | nd    | nd    | nd   | nd   | nd    | nd    | nd    |
| Thiabendazole           | 1.50 | 12.62 | 6.44 | 3.74  | nd | 42.36 | 8.19 | 16.44 | 10.33 | 43.88 | 11.95 | 27.94 | 10.08 | 15.04 | 6.52 | 9.23 | 10.55 | 10.17 | 14.44 |

|                       |    |    |    |    |    |    |    |    |    |    |    |      |      |    |    |    |    |    |      |      |
|-----------------------|----|----|----|----|----|----|----|----|----|----|----|------|------|----|----|----|----|----|------|------|
| Thiacloprid           | nd   | nd   | nd | nd | nd | nd | nd | 1.55 | nd   |
| Thiamethoxam          | nd | 8.07 | 3.58 | nd | nd | nd | nd | nd | nd   | nd   |
| Thidiazuron           | nd   | nd   | nd | nd | nd | nd | nd | nd   | nd   |
| Thifensulfuron-methyl | nd   | nd   | nd | nd | nd | nd | nd | 1.58 | nd   |
| Thiodicarb            | nd   | nd   | nd | nd | nd | nd | nd | nd   | nd   |
| Thiofanox-sulfoxide   | nd   | nd   | nd | nd | nd | nd | nd | nd   | nd   |
| Thiophanate           | nd   | nd   | nd | nd | nd | nd | nd | nd   | nd   |
| Thiophanate-methyl    | nd   | nd   | nd | nd | nd | nd | nd | nd   | nd   |
| Tralkoxydim           | nd   | nd   | nd | nd | nd | nd | nd | nd   | nd   |
| Triadimefon           | nd   | nd   | nd | nd | nd | nd | nd | nd   | nd   |
| Triadimenol           | nd   | nd   | nd | nd | nd | nd | nd | nd   | nd   |
| Triasulfuron          | nd   | nd   | nd | nd | nd | nd | nd | 2.61 | nd   |
| Triazophos            | nd   | nd   | nd | nd | nd | nd | nd | 1.53 | nd   |
| Tricyclazole          | nd   | nd   | nd | nd | nd | nd | nd | 1.53 | nd   |
| Trietazin             | nd   | nd   | nd | nd | nd | nd | nd | 1.19 | 1.07 |
| Trifloxystrobin       | nd   | nd   | nd | nd | nd | nd | nd | nd   | nd   |
| Triflumizole          | nd   | nd   | nd | nd | nd | nd | nd | nd   | nd   |
| Triflumuron           | nd   | nd   | nd | nd | nd | nd | nd | nd   | nd   |
| Triflusulfuron-methyl | nd   | nd   | nd | nd | nd | nd | nd | 1.57 | nd   |

|                                 |               |             |               |              |               |              |               |             |             |              |             |              |             |             |             |             |             |             |              |             |
|---------------------------------|---------------|-------------|---------------|--------------|---------------|--------------|---------------|-------------|-------------|--------------|-------------|--------------|-------------|-------------|-------------|-------------|-------------|-------------|--------------|-------------|
| Trimethylphenyl-methylcarbamate | nd            | nd          | nd            | nd           | nd            | nd           | nd            | nd          | nd          | nd           | nd          | nd           | nd          | nd          | nd          | nd          | nd          | nd          | nd           | nd          |
| Triticonazole                   | nd            | nd          | nd            | nd           | nd            | nd           | nd            | nd          | nd          | nd           | nd          | nd           | nd          | nd          | nd          | nd          | nd          | nd          | nd           | nd          |
| Vamidothion                     | nd            | nd          | nd            | nd           | nd            | nd           | nd            | nd          | nd          | nd           | nd          | nd           | nd          | nd          | nd          | nd          | nd          | nd          | 1.54         | nd          |
| Vamidothion-sulfoxide           | nd            | nd          | nd            | nd           | nd            | nd           | nd            | nd          | nd          | nd           | nd          | nd           | nd          | nd          | nd          | nd          | nd          | nd          | nd           | nd          |
| Zoxamide                        | nd            | nd          | nd            | nd           | nd            | nd           | nd            | nd          | nd          | nd           | nd          | nd           | nd          | nd          | nd          | nd          | nd          | nd          | nd           | nd          |
| <b>SUM (above 10 ng/L)</b>      | <b>&lt;10</b> | <b>28.0</b> | <b>&lt;10</b> | <b>163.2</b> | <b>&lt;10</b> | <b>92.9</b>  | <b>&lt;10</b> | <b>30.5</b> | <b>20.7</b> | <b>85.8</b>  | <b>28.8</b> | <b>145.9</b> | <b>20.2</b> | <b>31.3</b> | <b>31.9</b> | <b>10.3</b> | <b>22.5</b> | <b>22.5</b> | <b>33.2</b>  | <b>25.0</b> |
| <b>SUM (all results)</b>        | <b>11.8</b>   | <b>34.5</b> | <b>19.5</b>   | <b>212.7</b> | <b>15.7</b>   | <b>159.0</b> | <b>30.0</b>   | <b>45.8</b> | <b>31.3</b> | <b>131.4</b> | <b>45.2</b> | <b>219.1</b> | <b>34.7</b> | <b>46.1</b> | <b>58.4</b> | <b>26.2</b> | <b>36.5</b> | <b>30.8</b> | <b>244.5</b> | <b>41.5</b> |
